# Supplementary material for: Antimicrobially Active Zn(II) Complexes of Reduced Schiff Bases Derived from Cyclohexane-1,2-diamine and Fluorinated Benzaldehydes—Synthesis, Crystal Structure and Bioactivity
Source: MDPI journal article supplement (doi:10.3390/life13071516), 2023-07-06
Supplement: s1 [file s1]

## Supplementary Materials

### NMR and IR characterisation of ligands and Zn(II) complexes:

#### (±)-*trans*-*N,N'*-Bis-(4-fluoro-benzylidene)-cyclohexane-1,2-diamine (L1):

IR (neat, cm<sup>-1</sup>): 2936, 2860 ν(CH<sub>2</sub>/CH), 1645 ν(CH=N), 1601, 1506, 1226 ν(C-F), 834. <sup>1</sup>H NMR (400 MHz, CDCl<sub>3</sub>, δ, ppm) 1.45 – 1.51 (m, 2H); 1.74 – 1.87 (m, 6H); 3.33 – 3.40 (m, 2H); 6.96 – 7.01 (m, 4H); 7.54 – 7.59 (m, 4H); 8.13 (s, 2H). <sup>13</sup>C-NMR (100 MHz, CDCl<sub>3</sub>, δ, ppm): 24.44, 32.88 (CH<sub>2</sub>); 73.70 (CH); 115.35, 115.55, 129.64, 129.73, 132.55, 132.58 (arom-C); 159.55, 162.77 (CH=N); 165.28 (CF).

#### (±)-*trans*-*N,N'*-Bis-(4-trifluoromethyl-benzylidene)-cyclohexane-1,2-diamine (L2):

IR (neat, cm<sup>-1</sup>): 2936, 2862 ν(CH<sub>2</sub>/CH), 1643 ν(CH=N), 1320 ν(CF), 1170, 1126, 1064, 842. <sup>1</sup>H NMR (400 MHz, CDCl<sub>3</sub>, δ, ppm): 1.48 – 1.53 (m, 2H); 1.78 – 1.90 (m, 6H); 3.44 – 3.61 (m, 2H); 7.56 (d, J = 8.2 Hz, 4H); 7.69 (d, J = 7.0 Hz, 4H); 8.22 (s, 2H). <sup>13</sup>C-NMR (100 MHz, CDCl<sub>3</sub>, δ, ppm): 24.32, 32.74 (CH<sub>2</sub>); 73.87 (CH); 122.52 (CF<sub>3</sub>); 125.42, 125.22, 125.35, 125.39, 125.42, 125.46, 127.93, 128.04, 131.79, 132.11, 139.33 (arom-C); 159.43 (CH=N).

#### (±)-*trans*-*N,N'*-Bis-(3,5-difluorobenzylidene)-cyclohexane-1,2-diamine (L3):

IR (neat, cm<sup>-1</sup>): 3093, 3055, 3021, 2938, 2862 ν(CH<sub>2</sub>/CH), 1648 ν(CH=N), 1622, 1594, 1318, 1119 ν(CF), 854, 670. <sup>1</sup>H NMR (400 MHz, CDCl<sub>3</sub>, δ, ppm): 1.45 – 1.51 (m, 2H); 1.75 – 1.89 (m, 6H); 3.36 – 3.43 (m, 2H); 6.76 – 6.81 (m, 2H); 7.09 – 7.15 (m, 4H); 8.08 (s, 2H). <sup>13</sup>C-NMR (100 MHz, CDCl<sub>3</sub>, δ, ppm): 24.25, 32.65 (CH<sub>2</sub>); 73.54 (CH); 105.33, 105.59, 105.84, 110.34, 110.41, 110.53, 110.60, 139.42, 139.51, 139.60, 158.33, 158.36, 158.39 (arom-C); 161.72, 161.84 (CH=N); 164.20, 164.32 (CF).

#### (±)-*trans*-*N,N'*-Bis-(3,5-bis-trifluoromethylbenzylidene)-cyclohexane-1,2-diamine (L4):

IR (neat, cm<sup>-1</sup>): 2942, 2872 ν(CH<sub>2</sub>/CH), 1652 ν(CH=N), 1277 ν(CF), 1131, 894, 681. <sup>1</sup>H NMR (400 MHz, CDCl<sub>3</sub>, δ, ppm): 1.49 – 1.62 (m, 2H), 1.80 – 1.92 (m, 6H); 3.46 – 3.53 (m, 2H); 7.83 (s, 2H); 8.04 (s, 4H); 8.27 (s, 2H). <sup>13</sup>C-NMR (100 MHz, CDCl<sub>3</sub>, δ, ppm): 24.20, 32.60 (CH<sub>2</sub>); 73.76 (CH); 118.96, 121.67, 123.69, 123.73, 123.77 (CF<sub>3</sub>); 124.39, 127.10, 127.64, 127.67, 131.50, 131.83, 132.16, 132.50, 138.01 (arom-C); 157.70 (CH=N).

#### (±)-*trans*-*N,N'*-Bis-(4-fluorobenzyl)-cyclohexane-1,2-diaminium dichloride (L11):

IR (neat, cm<sup>-1</sup>): 2937 ν(CH<sub>2</sub>/CH), 2702, 2630 ν(NH<sub>2</sub><sup>+</sup>), 1603, 1509, 1221 ν(CF), 833. <sup>1</sup>H NMR (400 MHz, CD<sub>3</sub>OD, δ, ppm): 1.42 – 1.47 (m, 2H); 1.67 (d, J = 11.0 Hz, 2H); 1.89 – 1.92 (m, 2H); 2.47 (d, J = 13.1 Hz, 2H); 3.55 (s, 2H); 4.29 (d, J = 13.0 Hz, 2H); 4.40 (d, J = 13.0 Hz, 2H); 7.16 – 7.22 (m, 4H); 7.68 – 7.71 (m, 4H). <sup>13</sup>C-NMR (100 MHz, CD<sub>3</sub>OD, δ, ppm): 22.23, 26.37 (CH<sub>2</sub>); 57.01 (CH); 115.50, 115.72, 132.53, 132.61 (arom-C); 162.26, 164.73 (CF).

#### (±)-*trans*-*N,N'*-Bis-(4-trifluoromethylbenzyl)-cyclohexane-1,2-diaminium dichloride (L12):

IR (neat, cm<sup>-1</sup>): 2934, 2873 ν(CH<sub>2</sub>/CH), 2707, 2630 ν(NH<sub>2</sub><sup>+</sup>), 1621, 1323 ν(CF), 1162, 1127, 1067, 828. <sup>1</sup>H NMR (400 MHz, CD<sub>3</sub>OD, δ, ppm): 1.43 – 1.48 (m, 2H); 1.69 – 1.72 (m, 2H); 1.92 – 1.94 (m, 2H); 2.51 (d, J = 15.3 Hz, 2H); 3.62 (s, 2H); 4.39 (d, J = 13.1 Hz, 2H); 4.53 (d, J = 13.1 Hz, 2H); 7.76 (d, J = 8.2 Hz, 4H); 7.88 (d, J = 8.0 Hz, 4H). <sup>13</sup>C-NMR (100 MHz, CD<sub>3</sub>OD, δ, ppm): 22.38, 26.53 (CH<sub>2</sub>); 57.62 (CH); 122.56 (CF<sub>3</sub>); 125.26, 125.49, 125.53, 125.60, 126.64, 130.76, 130.86, 131.07, 131.40, 135.06 (arom-C).

#### (±)-*trans*-*N,N'*-Bis-(3,5-difluorobenzyl)-cyclohexane-1,2-diaminium dichloride (L13):

IR (neat, cm<sup>-1</sup>): 3046, 2950, 2874  $\nu$ (CH<sub>2</sub>/CH), 2629, 2593  $\nu$ (NH<sub>2</sub><sup>+</sup>), 1625, 1597, 1459, 1321, 1124  $\nu$ (CF), 858, 698. <sup>1</sup>H NMR (400 MHz, CD<sub>3</sub>OD,  $\delta$ , ppm): 1.41 – 1.46 (m, 2H); 1.63 – 1.65 (m, 2H); 1.90 – 1.93 (m, 2H); 2.46 (d, *J* = 13.2 Hz, 2H); 3.51 (s, 2H); 4.30 (d, *J* = 13.1 Hz, 2H); 4.44 (d, *J* = 13.2 Hz, 2H); 7.04 – 7.09 (m, 2H); 7.34 (d, *J* = 5.8 Hz, 4H). <sup>13</sup>C-NMR (100 MHz, CD<sub>3</sub>OD,  $\delta$ , ppm): 22.42, 26.63 (CH<sub>2</sub>); 57.66 (CH); 104.51, 112.96, 113.20 (arom-C); 161.87, 162.00, 164.35, 164.48 (CF).

( $\pm$ )-*trans*-*N,N'*-Bis-(3,5-bis-trifluoromethylbenzyl)-cyclohexane-1,2-diaminium dichloride (L14):

IR (neat, cm<sup>-1</sup>): 2955  $\nu$ (CH<sub>2</sub>/CH), 2725, 2563, 2408  $\nu$ (NH<sub>2</sub><sup>+</sup>), 1597, 1278  $\nu$ (CF), 1139, 907, 683. <sup>1</sup>H NMR (400 MHz, CD<sub>3</sub>OD,  $\delta$ , ppm): 1.45 – 1.50 (m, 2H); 1.69 (s, 2H); 1.94 – 1.97 (m, 2H); 2.52 (d, *J* = 13.2 Hz, 2H); 3.59 (s, 2H); 4.46 (d, *J* = 13.1 Hz, 2H); 4.64 (d, *J* = 13.1 Hz, 2H); 8.06 (s, 2H); 8.33 (s, 4H). <sup>13</sup>C-NMR (100 MHz, CD<sub>3</sub>OD,  $\delta$ , ppm): 23.71, 28.42 (CH<sub>2</sub>); 59.46 (CH); 119.15, 121.85 (CF<sub>3</sub>); 124.56, 127.26, 129.55, 131.27, 131.60, 131.93, 132.26 (C-arom.).

Dichloro[( $\pm$ )-*trans*-*N,N'*-bis-(4-fluorobenzyl)-cyclohexane-1,2-diamine]zinc(II) (Zn-L11):

IR (neat, cm<sup>-1</sup>): 3206  $\nu$ (NH), 2960 – 2871  $\nu$ (CH<sub>2</sub>/CH), 1604, 1511, 1220  $\nu$ (CF), 840. <sup>1</sup>H NMR (400 MHz, DMSO-d<sub>6</sub>,  $\delta$ , ppm): 1.13 – 1.35 (m, 4H), 1.71 – 1.73 (m, 4H), 2.30 – 2.43 (m, 2H), 3.71 (t, *J* = 11.0 Hz, 2H), 3.94 (d, *J* = 12.2 Hz, 2H), 7.13 – 7.17 (m, 4H), 7.53 (s, 4H). <sup>13</sup>C-NMR (100 MHz, DMSO-d<sub>6</sub>,  $\delta$ , ppm): 24.16, 28.38, 48.67 (CH<sub>2</sub>); 60.88 (CH); 114.63, 114.84, 131.46, 132.62 (C-arom.); 160.28, 162.70 (CF).

Dichlorido[( $\pm$ )-*trans*-*N,N'*-bis-(4-trifluoromethylbenzyl)-cyclohexane-1,2-diamine]zinc(II) (Zn-L12):

IR (neat, cm<sup>-1</sup>): 3204  $\nu$ (NH), 2953, 2867  $\nu$ (CH<sub>2</sub>/CH), 1324  $\nu$ (CF), 1113, 1065, 823. <sup>1</sup>H NMR (400 MHz, DMSO-d<sub>6</sub>,  $\delta$ , ppm): 1.15 – 1.36 (m, 4H); 1.73 – 1.74 (m, 4H); 2.33 – 2.46 (m, 2H); 3.81 (t, *J* = 11.2 Hz, 2H); 4.08 (d, *J* = 12.6 Hz, 2H); 7.69 (s, 8H). <sup>13</sup>C-NMR (100 MHz, DMSO-d<sub>6</sub>,  $\delta$ , ppm): 24.68, 28.96, 49.58 (CH<sub>2</sub>); 61.54 (CH); 123.37 (C-F); 125.26, 125.30, 125.38, 126.08, 130.27, 125.34, 126.08, 128.24 – 128.78, 130.27, 141.66 (C-arom.).

Dichlorido[( $\pm$ )-*trans*-*N,N'*-bis-(3,5-difluorobenzyl)-cyclohexane-1,2-diamine]zinc(II) (Zn-L13):

IR (neat, cm<sup>-1</sup>): 3195  $\nu$ (NH), 2951, 2870  $\nu$ (CH<sub>2</sub>/CH), 1628, 1601, 1446, 1115  $\nu$ (CF), 833, 670. <sup>1</sup>H NMR (400 MHz, DMSO-d<sub>6</sub>,  $\delta$ , ppm): 1.14 – 1.34 (m, 4H); 1.73 – 1.75 (m, 4H); 2.30 – 2.43 (m, 2H); 3.70 (t, *J* = 10.2 Hz, 2H); 4.04 (d, *J* = 12.9 Hz, 2H); 7.11 – 7.22 (m, 6H). <sup>13</sup>C-NMR (100 MHz, DMSO-d<sub>6</sub>,  $\delta$ , ppm): 24.64, 28.96, 43.31 (CH<sub>2</sub>); 61.49 (CH); 103.06, 103.30, 103.55, 112.67, 141.42 (C-arom.); 161.23, 161.36, 163.67, 163.80 (CF).

Dichlorido[( $\pm$ )-*trans*-*N,N'*-bis-(3,5-bis-trifluoromethylbenzyl)-cyclohexane-1,2-diamine]zinc(II) (Zn-L14):

IR (neat, cm<sup>-1</sup>): 3189  $\nu$ (NH), 2952, 2869  $\nu$ (CH<sub>2</sub>/CH), 1279  $\nu$ (CF), 1166, 1130, 897, 684. <sup>1</sup>H NMR (400 MHz, DMSO-d<sub>6</sub>,  $\delta$ , ppm): 1.19 – 1.34 (m, 4H); 1.77 (s, 4H); 2.34 – 2.48 (m, 2H); 3.82 (t, *J* = 11.6 Hz, 2H); 4.24 (s, 2H); 7.99 (s, 2H); 8.16 (s, 4H). <sup>13</sup>C-NMR (100 MHz, DMSO-d<sub>6</sub>,  $\delta$ , ppm): 24.67, 29.02, 49.27 (CH<sub>2</sub>); 61.93 (CH); 119.75, 121.64 (CF<sub>3</sub>); 122.46, 125.17, 127.89, 129.84, 130.17, 130.49, 130.71, 130.82, 140.09 (C-arom.).

**Table S1** Hydrogen bonds and interactions for compounds **L1** – **L4**.

| Hydrogen Bonds for L1 |     |                   |          |          |          |         |
|-----------------------|-----|-------------------|----------|----------|----------|---------|
| D                     | H   | A                 | d(D-H)/Å | d(H-A)/Å | d(D-A)/Å | D-H-A/° |
| C9                    | H9B | F1 <sup>(i)</sup> | 0.99     | 2.60     | 3.116(3) | 112.5   |

|                       |          |                       |                 |                 |                 |                |
|-----------------------|----------|-----------------------|-----------------|-----------------|-----------------|----------------|
| C30                   | H30B     | F4 <sup>(ii)</sup>    | 0.99            | 2.62            | 3.104(3)        | 110.5          |
| Hydrogen Bonds for L2 |          |                       |                 |                 |                 |                |
| <b>D</b>              | <b>H</b> | <b>A</b>              | <b>d(D-H)/Å</b> | <b>d(H-A)/Å</b> | <b>d(D-A)/Å</b> | <b>D-H-A/°</b> |
| C10                   | H10A     | F6 <sup>(iii)</sup>   | 0.99            | 2.68            | 3.395(4)        | 129.8          |
| C11                   | H11A     | F5 <sup>(iv)</sup>    | 0.99            | 2.62            | 3.337(5)        | 129.1          |
| Hydrogen Bonds for L3 |          |                       |                 |                 |                 |                |
|                       | <b>H</b> | <b>A</b>              | <b>d(D-H)/Å</b> | <b>d(H-A)/Å</b> | <b>d(D-A)/Å</b> | <b>D-H-A/°</b> |
| C32                   | H32      | F4                    | 0.95            | 2.62            | 3.0856(13)      | 110.6          |
| C46                   | H46      | N1 <sup>(v)</sup>     | 0.95            | 2.56            | 3.4900(15)      | 167.3          |
| C13                   | H13A     | F3 <sup>(vi)</sup>    | 0.95            | 2.60            | 3.2856(14)      | 126.2          |
| Hydrogen Bonds for L4 |          |                       |                 |                 |                 |                |
| <b>D</b>              | <b>H</b> | <b>A</b>              | <b>d(D-H)/Å</b> | <b>d(H-A)/Å</b> | <b>d(D-A)/Å</b> | <b>D-H-A/°</b> |
| C3                    | H3       | F1 <sup>(vii)</sup>   | 0.95            | 2.63            | 3.531(4)        | 157.9          |
| C7                    | H7       | F12 <sup>(viii)</sup> | 0.95            | 2.66            | 3.598(4)        | 171.4          |
| C13                   | H13B     | F8 <sup>(ix)</sup>    | 0.99            | 2.63            | 3.461(4)        | 141.9          |
| C15                   | H15A     | F11 <sup>(x)</sup>    | 0.99            | 2.56            | 3.487(4)        | 155.2          |
| C15                   | H15B     | F1 <sup>(xi)</sup>    | 0.99            | 2.60            | 3.436(4)        | 142.3          |
| C18                   | H18      | F7 <sup>(xii)</sup>   | 0.95            | 2.61            | 3.193(4)        | 119.7          |

Symmetry transformations used to generate equivalent atoms:

(i)-1/2+x,1/2-y,+z; (ii)1/2+x,-5/2-y,+z; (iii)1/2+x,1-y,+z; (iv)1/2-x,-1+y,-1/2+z; (v)1-x,1/2+y,3/2-z; (vi)-x,1-y,1-z; (vii)1-x,1-y,-z; (viii)x,-1+y,+z; (ix)2-x,1-y,1-z; (x)1+x,+y,+z; (xi)1-x,1-y,1-z

**Table S2.** Hydrogen bonds and interactions for compounds L11 – L13.

| Hydrogen Bonds for L11 |          |          |                 |                 |                 |                |
|------------------------|----------|----------|-----------------|-----------------|-----------------|----------------|
| <b>D</b>               | <b>H</b> | <b>A</b> | <b>d(D-H)/Å</b> | <b>d(H-A)/Å</b> | <b>d(D-A)/Å</b> | <b>D-H-A/°</b> |

| N1                     | H1A  | Cl <sub>2</sub> | 0.91     | 2.34     | 3.106(3)   | 142     |
|------------------------|------|-----------------|----------|----------|------------|---------|
| N1                     | H1B  | Cl <sub>1</sub> | 0.91     | 2.15     | 3.057(2)   | 176     |
| N2                     | H2A  | Cl <sub>2</sub> | 0.91     | 2.35     | 3.107(2)   | 141     |
| N3                     | H2B  | Cl <sub>1</sub> | 0.91     | 2.35     | 3.127(2)   | 168     |
| Hydrogen Bonds for L12 |      |                 |          |          |            |         |
| D                      | H    | A               | d(D-H)/Å | d(H-A)/Å | d(D-A)/Å   | D-H-A/° |
| N1 <sub>1</sub>        | H11A | Cl <sub>4</sub> | 0.91     | 2.18     | 3.0716(19) | 165     |
| N1 <sub>1</sub>        | H11B | Cl <sub>2</sub> | 0.91     | 2.26     | 3.092(2)   | 151     |
| N2 <sub>3</sub>        | H23A | Cl <sub>3</sub> | 0.91     | 2.26     | 3.1466(19) | 166     |
| N2 <sub>3</sub>        | H23B | Cl <sub>2</sub> | 0.91     | 2.43     | 3.215(2)   | 144     |
| N4 <sub>1</sub>        | H41A | Cl <sub>4</sub> | 0.91     | 2.35     | 3.172(2)   | 151     |
| N4 <sub>1</sub>        | H41B | Cl <sub>1</sub> | 0.91     | 2.34     | 3.171(2)   | 151     |
| N5 <sub>3</sub>        | H53A | Cl <sub>1</sub> | 0.91     | 2.34     | 3.120(2)   | 144     |
| N5 <sub>3</sub>        | H53B | Cl <sub>3</sub> | 0.91     | 2.17     | 3.077(2)   | 177     |
| Hydrogen Bonds for L13 |      |                 |          |          |            |         |
| D                      | H    | A               | d(D-H)/Å | d(H-A)/Å | d(D-A)/Å   | D-H-A/° |
| N1                     | H1A  | Cl <sub>1</sub> | 0.91     | 2.49     | 3.2302(10) | 138     |
| N1                     | H1B  | Cl <sub>1</sub> | 0.91     | 2.16     | 3.0703(11) | 173     |

**Table S3.** Hydrogen bonds and interactions for compounds **Zn-L11** – **Zn-L14**.

| Hydrogen Bonds for Zn-L11 |     |                   |          |          |          |           |
|---------------------------|-----|-------------------|----------|----------|----------|-----------|
| D                         | H   | A                 | d(D-H)/Å | d(H-A)/Å | d(D-A)/Å | D-H-A/°   |
| C1 <sub>0</sub>           | H10 | F1 <sup>(i)</sup> | 0.95     | 2.589(2) | 3.193(2) | 121.72(5) |
| C1 <sub>1</sub>           | H11 | F1 <sup>(i)</sup> | 0.95     | 2.540(2) | 3.160(2) | 123.06(5) |

|                                  |          |                      |                 |                 |                 |                |
|----------------------------------|----------|----------------------|-----------------|-----------------|-----------------|----------------|
| C1<br>3                          | H13      | F1 <sup>(ii)</sup>   | 0.95            | 2.506(2)        | 3.279(2)        | 138.63(5)      |
| Hydrogen Bonds for <b>Zn-L12</b> |          |                      |                 |                 |                 |                |
| <b>D</b>                         | <b>H</b> | <b>A</b>             | <b>d(D-H)/Å</b> | <b>d(H-A)/Å</b> | <b>d(D-A)/Å</b> | <b>D-H-A/°</b> |
| N1                               | H1       | Cl1 <sup>(iii)</sup> | 1.00            | 2.55            | 3.462(2)        | 152            |
| N2                               | H2       | Cl2 <sup>(iv)</sup>  | 1.00            | 2.47            | 3.410(2)        | 157            |
| C1                               | H1A      | F6A <sup>(iv)</sup>  | 0.99            | 2.47            | 3.426(4)        | 161            |
| C1                               | H1A      | F6B <sup>(iv)</sup>  | 0.99            | 2.53            | 3.43(2)         | 151' 11' 323   |
| C6                               | H6       | F3 <sup>(v)</sup>    | 0.95            | 2.54            | 3.483(3)        | 169            |
| Hydrogen Bonds for <b>Zn-L13</b> |          |                      |                 |                 |                 |                |
| <b>D</b>                         | <b>H</b> | <b>A</b>             | <b>d(D-H)/Å</b> | <b>d(H-A)/Å</b> | <b>d(D-A)/Å</b> | <b>D-H-A/°</b> |
| N1                               | H1       | Cl1 <sup>(vi)</sup>  | 1.00            | 2.41            | 3.4001(18)      | 168            |
| C8                               | H8       | F1 <sup>(vii)</sup>  | 1.00            | 2.47            | 3.225(2)        | 131            |
| Hydrogen Bonds for <b>Zn-L14</b> |          |                      |                 |                 |                 |                |
| <b>D</b>                         | <b>H</b> | <b>A</b>             | <b>d(D-H)/Å</b> | <b>d(H-A)/Å</b> | <b>d(D-A)/Å</b> | <b>D-H-A/°</b> |
| N1                               | H1       | Cl1                  | 1.00            | 2.31            | 3.259(2)        | 158            |

Symmetry transformations used to generate equivalent atoms:

(i)-x,1-y,1-z; (ii)+x,3/2-y, -1/2+z; (iii)1-x,1-y,,1-z; (iv)1-x,2-y,1-z; (v)-x,-y,-z; (vi)-x,1-y,1-z; (vii)1/2+x,1-y,z

**Table S4.** Crystal data and structure refinement for compounds **L1**, **L2**, **L3** and **L4**.

| Compound                      | L1                                                            | L2                                                            | L3                                                                     | L4                                                                        |
|-------------------------------|---------------------------------------------------------------|---------------------------------------------------------------|------------------------------------------------------------------------|---------------------------------------------------------------------------|
| Empirical formula             | C <sub>20</sub> H <sub>20</sub> F <sub>2</sub> N <sub>2</sub> | C <sub>22</sub> H <sub>20</sub> F <sub>6</sub> N <sub>2</sub> | C <sub>20</sub> H <sub>18</sub> F <sub>4</sub> N <sub>2</sub>          | C <sub>24</sub> H <sub>18</sub> F <sub>12</sub> N <sub>2</sub>            |
| Temperature [K]               | 100(1)                                                        | 100(1)                                                        | 100(1)                                                                 | 100(1)                                                                    |
| Wavelength [Å]                | 1.54186                                                       | 1.54186                                                       | 1.54184                                                                | 1.54186                                                                   |
| Crystal system                | Orthorhombic                                                  | Orthorhombic                                                  | Monoclinic                                                             | Triclinic                                                                 |
| Space group                   | <i>Pna</i> 2 <sub>1</sub>                                     | <i>Pca</i> 2 <sub>1</sub>                                     | <i>P</i> 2 <sub>1</sub> /c                                             | <i>P</i> -1                                                               |
| Unit cell dimensions [Å], [°] | a = 12.2541(4)<br>b = 7.8234(2)<br>c = 14.2698(4)             | a = 21.2205(2)<br>b = 11.0966(3)<br>c = 8.4451(4)             | a = 16.01994(8)<br>b = 16.33377(8)<br>c = 13.72619(7)<br>$\alpha$ = 90 | a = 9.2376(2)<br>b = 9.7046(2)<br>c = 15.6329(3)<br>$\alpha$ = 105.839(2) |

|                                                     |                                             |                                             |                                              |                                              |
|-----------------------------------------------------|---------------------------------------------|---------------------------------------------|----------------------------------------------|----------------------------------------------|
|                                                     | $\alpha, \beta, \gamma = 90.0$              | $\alpha, \beta, \gamma = 90.0$              | $\beta = 90.5538(4)$<br>$\gamma = 90$        | $\beta = 92.671(2)$<br>$\gamma = 117.377(2)$ |
| Formula weight                                      | 326.38                                      | 426.40                                      | 362.36                                       | 562.40                                       |
| Volume [ $\text{\AA}^3$ ]                           | 3323.94(11)                                 | 1988.61(11)                                 | 3591.51(3)                                   | 1172.68(5)                                   |
| Z / Calculated density [ $\text{Mg/m}^3$ ]          | 8 / 1.304                                   | 4 / 1.424                                   | 8 / 1.340                                    | 2 / 1.593                                    |
| Absorption coeff. [ $\text{mm}^{-1}$ ]              | 0.759                                       | 1.071                                       | 0.924                                        | 1.488                                        |
| F(000)                                              | 1376                                        | 880                                         | 1504.0                                       | 568                                          |
| Crystal size [mm]                                   | 0.3 x 0.29 x 0.08                           | 0.24 x 0.13 x 0.08                          | 0.32 x 0.23 x 0.18                           | 0.30 x 0.26 x 0.18                           |
| Theta range for data collection                     | 10.316 to 144.256°                          | 7.968 to 144.238°                           | 5.516 to 133.202°                            | 10.542 to 130.148°                           |
| Index ranges                                        | -10 ≤ h ≤ 20<br>-7 ≤ k ≤ 6<br>-40 ≤ l ≤ 41  | -25 ≤ h ≤ 25<br>-13 ≤ k ≤ 13<br>-10 ≤ l ≤ 5 | -19 ≤ h ≤ 19<br>-19 ≤ k ≤ 19<br>-16 ≤ l ≤ 15 | -10 ≤ h ≤ 10<br>-11 ≤ k ≤ 5<br>-16 ≤ l ≤ 18  |
| Reflections collected / Independent reflections     | 33784 / 6372<br>[R(int) = 0.0234]           | 43994 / 2847 [R(int) = 0.0563]              | 64208 / 6349<br>[R(int) = 0.0442]            | 38679 / 3962 [R(int) = 0.0235]               |
| Refinement method                                   | Full-matrix least-squares on F <sup>2</sup> |                                             |                                              |                                              |
| Data / restraints / parameters                      | 6372 / 1 / 433                              | 2847 / 1 / 272                              | 6349 / 0 / 469                               | 3962 / 0 / 343                               |
| Goodness-of-fit on F <sup>2</sup>                   | 1.046                                       | 1.063                                       | 1.029                                        | 1.089                                        |
| Final R indices [I > 2σ(I)]                         | R1 = 0.0415<br>wR2 = 0.1098                 | R1 = 0.0461<br>wR2 = 0.1238                 | R1 = 0.0316<br>wR2 = 0.0800                  | R1 = 0.0585<br>wR2 = 0.1806                  |
| R indices (all data)                                | R1 = 0.0422<br>wR2 = 0.1103                 | R1 = 0.0498<br>wR2 = 0.1288                 | R1 = 0.0338<br>wR2 = 0.0813                  | R1 = 0.0594<br>wR2 = 0.1814                  |
| Flack parameter                                     | 0.10(12)                                    | 0.0(3)                                      | n/a                                          | n/a                                          |
| Largest diff. peak and hole [ $\text{e.\AA}^{-3}$ ] | 0.30 and -0.21                              | 0.47 and -0.40                              | 0.193 and -0.206                             | 0.48 and -0.32                               |

**Table S5.** Crystal data and structure refinement for compounds **L11** – **L13**.

| Compound                    | <b>L11</b>                                                  | <b>L12</b>                                                  | <b>L13</b>                                                  |
|-----------------------------|-------------------------------------------------------------|-------------------------------------------------------------|-------------------------------------------------------------|
| Empirical formula           | $\text{C}_{20}\text{H}_{26}\text{Cl}_2\text{F}_2\text{N}_2$ | $\text{C}_{22}\text{H}_{26}\text{Cl}_2\text{F}_6\text{N}_2$ | $\text{C}_{20}\text{H}_{24}\text{Cl}_2\text{F}_4\text{N}_2$ |
| Temperature [K]             | 100(1)                                                      | 100(1)                                                      | 100(1)                                                      |
| Wavelength [ $\text{\AA}$ ] | 1.54184                                                     | 1.54184                                                     | 1.54184                                                     |
| Crystal system              | Tetragonal                                                  | Orthorhombic                                                | Orthorhombic                                                |

|                                                  |                                                                                          |                                                                                                |                                                                                                |
|--------------------------------------------------|------------------------------------------------------------------------------------------|------------------------------------------------------------------------------------------------|------------------------------------------------------------------------------------------------|
| Space group                                      | I4 <sub>1</sub> /a                                                                       | P2 <sub>1</sub> 2 <sub>1</sub> 2 <sub>1</sub>                                                  | Pbcn                                                                                           |
| Unit cell dimensions [Å], [°]                    | a = 24.7671(4)<br>b = 24.7671(4)<br>c = 13.7413(3)<br><br>$\alpha = \beta = \gamma = 90$ | a = 13.70588(12)<br>b = 17.22503(16)<br>c = 19.47689(18)<br><br>$\alpha = \beta = \gamma = 90$ | a = 13.70588(12)<br>b = 17.22503(16)<br>c = 19.47689(18)<br><br>$\alpha = \beta = \gamma = 90$ |
| Formula weight                                   | 403.33                                                                                   | 503.35                                                                                         | 439.31                                                                                         |
| Volume [Å <sup>3</sup> ]                         | 8429.1(4)                                                                                | 4598.19(7)                                                                                     | 2084.32(5)                                                                                     |
| Z / Calculated density [Mg/m <sup>3</sup> ]      | 16 / 1.271                                                                               | 8 / 1.454                                                                                      | 4 / 1.400                                                                                      |
| Absorption coeff. [mm <sup>-1</sup> ]            | 2.968                                                                                    | 3.098                                                                                          | 3.192                                                                                          |
| F(000)                                           | 3392.0                                                                                   | 2080.0                                                                                         | 912.0                                                                                          |
| Crystal size [mm]                                | 0.315 x 0.126 x 0.071                                                                    | 0.48 x 0.05 x 0.04                                                                             | 0.16 x 0.11 x 0.08                                                                             |
| Theta range for data collection                  | 7.138 to 133.128°                                                                        | 3.224 to 78.898°                                                                               | 3.046 to 78.729°                                                                               |
| Index ranges                                     | -24<= <i>h</i> <=18<br>-26<= <i>k</i> <=29<br>-12<= <i>l</i> <=16                        | -17<= <i>h</i> <=13<br>-21<= <i>k</i> <=21<br>-24<= <i>l</i> <=24                              | -17<= <i>h</i> <=17<br>-17<= <i>k</i> <=18<br>-13<= <i>l</i> <=11                              |
| Reflections collected / Independent reflections  | 11957 / 3676<br>[R(int) = 0.0511]                                                        | 49049 / 8119<br>[R(int) = 0.0479]                                                              | 17820 / 1844<br>[R(int) = 0.0385]                                                              |
| Refinement method                                | Full-matrix least-squares on F <sup>2</sup>                                              |                                                                                                |                                                                                                |
| Data / restraints / parameters                   | 3676 / 0 / 235                                                                           | 8119 / 0 / 577                                                                                 | 1844 / 0 / 127                                                                                 |
| Goodness-of-fit on F <sup>2</sup>                | 1.090                                                                                    | 1.036                                                                                          | 1.067                                                                                          |
| Final R indices [I>2σ(I)]                        | R1 = 0.0618<br>wR2 = 0.1748                                                              | R1 = 0.0240<br>wR2 = 0.0610                                                                    | R1 = 0.0256<br>wR2 = 0.0683                                                                    |
| R indices (all data)                             | R1 = 0.0715<br>wR2 = 0.1823                                                              | R1 = 0.0251<br>wR2 = 0.0615                                                                    | R1 = 0.0265<br>wR2 = 0.0693                                                                    |
| Flack parameter                                  | n/a                                                                                      | -0.002(4)                                                                                      | n/a                                                                                            |
| Largest diff. peak and hole [e.Å <sup>-3</sup> ] | 0.39 and -0.61                                                                           | 0.257 and -0.171                                                                               | 0.385 and -0.174                                                                               |

**Table S6.** Crystal data and structure refinement for compounds **Zn-L11 – Zn-L14**.

| Compound                                        | Zn-L11                                                                           | Zn-L12                                                                                                     | Zn-L13                                                                                       | Zn-L14                                                                                     |
|-------------------------------------------------|----------------------------------------------------------------------------------|------------------------------------------------------------------------------------------------------------|----------------------------------------------------------------------------------------------|--------------------------------------------------------------------------------------------|
| Empirical formula                               | C <sub>20</sub> H <sub>24</sub> Cl <sub>2</sub> F <sub>2</sub> N <sub>2</sub> Zn | C <sub>22</sub> H <sub>24</sub> Cl <sub>2</sub> F <sub>6</sub> N <sub>2</sub> Zn                           | C <sub>20</sub> H <sub>22</sub> Cl <sub>2</sub> F <sub>4</sub> N <sub>2</sub> Zn             | C <sub>24</sub> H <sub>22</sub> Cl <sub>2</sub> F <sub>12</sub> N <sub>2</sub> Zn          |
| Temperature [K]                                 | 100.02(13)                                                                       | 100(1)                                                                                                     | 99.99(11)                                                                                    | 100(1)                                                                                     |
| Wavelength [Å]                                  | 1.54184                                                                          | 1.54184                                                                                                    | 1.54184                                                                                      | 1.54184                                                                                    |
| Crystal system                                  | Orthorhombic                                                                     | Triclinic                                                                                                  | Monoclinic                                                                                   | Monoclinic                                                                                 |
| Space group                                     | <i>Pbca</i>                                                                      | <i>P</i> -1                                                                                                | <i>C2/c</i>                                                                                  | <i>C2/c</i>                                                                                |
| Unit cell dimensions [Å], [°]                   | a = 13.32270(10)<br>b = 11.12120(10)<br>c = 27.4597(2)<br><br>α = β = γ = 90     | a = 9.7407(3)<br>b = 10.7838(3)<br>c = 12.9831(5)<br><br>α = 109.817(3)<br>β = 95.541(3)<br>γ = 103.759(3) | a = 11.1380(3)<br>b = 14.1925(3)<br>c = 13.9702(3)<br><br>α = 90<br>β = 111.490(3)<br>γ = 90 | a = 27.2981(8)<br>b = 9.8751(2)<br>c = 10.4760(3)<br><br>α = 90<br>β = 96.848(2)<br>γ = 90 |
| Formula weight                                  | 466.68                                                                           | 566.70                                                                                                     | 502.66                                                                                       | 702.70                                                                                     |
| Volume [Å <sup>3</sup> ]                        | 4068.55(6)                                                                       | 1222.54(7)                                                                                                 | 2054.83(9)                                                                                   | 2803.88(13)                                                                                |
| Z / Calculated density [Mg/m <sup>3</sup> ]     | 8 / 1.524                                                                        | 2 / 1.539                                                                                                  | 4 / 1.625                                                                                    | 4 / 1.665                                                                                  |
| Absorption coeff. [mm <sup>-1</sup> ]           | 4.311                                                                            | 3.942                                                                                                      | 4.462                                                                                        | 3.889                                                                                      |
| F(000)                                          | 1920.0                                                                           | 576.0                                                                                                      | 1024.0                                                                                       | 1408.0                                                                                     |
| Crystal size [mm]                               | 0.2 x 0.1 x 0.09                                                                 | 0.15 x 0.10 x 0.07                                                                                         | 0.14 x 0.11 x 0.07                                                                           | 0.11 x 0.04 x 0.03                                                                         |
| Theta range for data collection                 | 6.438 to 157.304°                                                                | 3.688 to 77.54°                                                                                            | 9.226 to 133.19°                                                                             | 6.522 to 157.064°                                                                          |
| Index ranges                                    | -15<=h<=16<br>-14<=k<=8<br>-34<=l<=34                                            | -11<=h<=12<br>-13<=k<=13<br>-16<=l<=16                                                                     | -10<=h<=13<br>-16<=k<=15<br>-16<=l<=16                                                       | -32<=h<=33<br>-12<=k<=12<br>-11<=l<=12                                                     |
| Reflections collected / Independent reflections | 20503 / 4143<br>[R(int) = 0.0320]                                                | 11784 / 4287<br>[R(int) = 0.0292]                                                                          | 5616 / 1793<br>[R(int) = 0.0425]                                                             | 20109 / 2874<br>[R(int) = 0.0702]                                                          |
| Refinement method                               | Full-matrix least-squares on F <sup>2</sup>                                      |                                                                                                            |                                                                                              |                                                                                            |
| Data / restraints / parameters                  | 4143 / 0 / 244                                                                   | 4287 / 0 / 307                                                                                             | 1793 / 0 / 132                                                                               | 2874 / 0 / 190                                                                             |
| Goodness-of-fit on F <sup>2</sup>               | 1.058                                                                            | 1.021                                                                                                      | 1.060                                                                                        | 1.062                                                                                      |
| Final R indices [I>2σ(I)]                       | R <sub>1</sub> = 0.0266<br>wR <sub>2</sub> = 0.0674                              | R <sub>1</sub> = 0.0324<br>wR <sub>2</sub> = 0.0800                                                        | R <sub>1</sub> = 0.0341<br>wR <sub>2</sub> = 0.0948                                          | R <sub>1</sub> = 0.0426<br>wR <sub>2</sub> = 0.1180                                        |



|                                                           |                                   |                                   |                                   |                                   |
|-----------------------------------------------------------|-----------------------------------|-----------------------------------|-----------------------------------|-----------------------------------|
| R indices (all data)                                      | $R_1 = 0.0282$<br>$wR_2 = 0.0683$ | $R_1 = 0.0344$<br>$wR_2 = 0.0814$ | $R_1 = 0.0359$<br>$wR_2 = 0.0960$ | $R_1 = 0.0475$<br>$wR_2 = 0.1216$ |
| Flack parameter                                           | n/a                               | n/a                               | n/a                               | n/a                               |
| Largest diff. peak and hole [ $e \cdot \text{\AA}^{-3}$ ] | 0.30 and -0.42                    | 0.825 and -0.401                  | 0.39 and -0.50                    | 0.82 and -0.40                    |

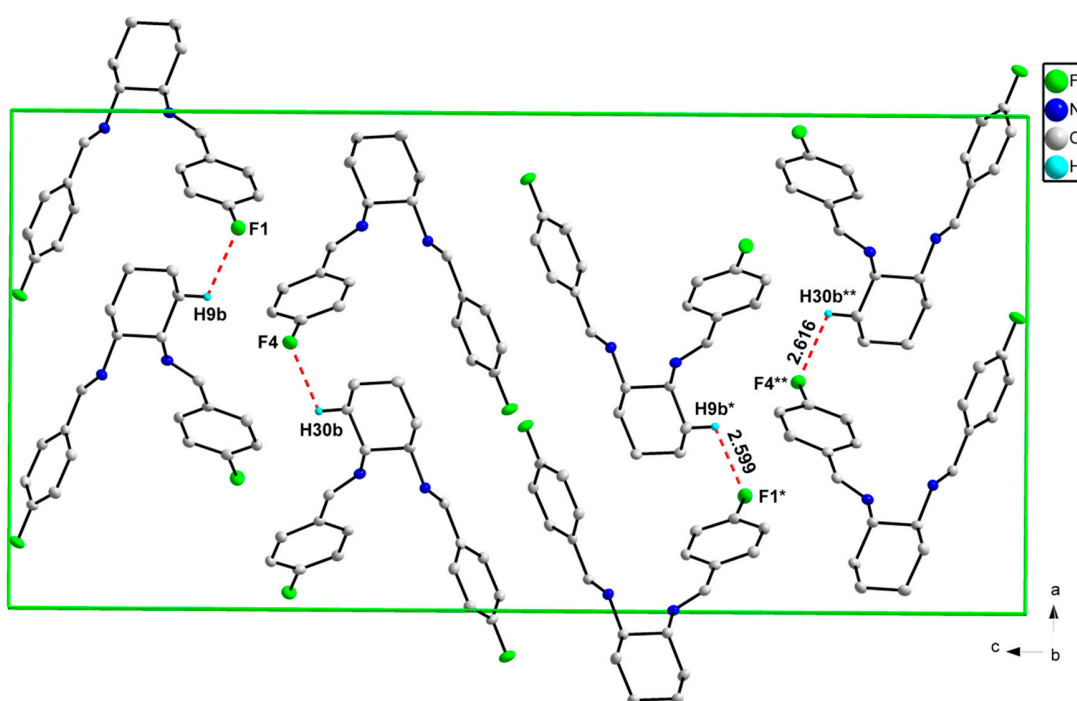

**Figure S1.** The crystal packing of **L1** viewed along the *b* axis. Red dashed lines indicate system (intermolecular) hydrogen-bond. Hydrogen atoms are omitted for clarity. Symmetry code: (\*)  $-0.5+x, 0.5-y, +z$ ; (\*\*)  $0.5+x, -2.5-y, +z$ .

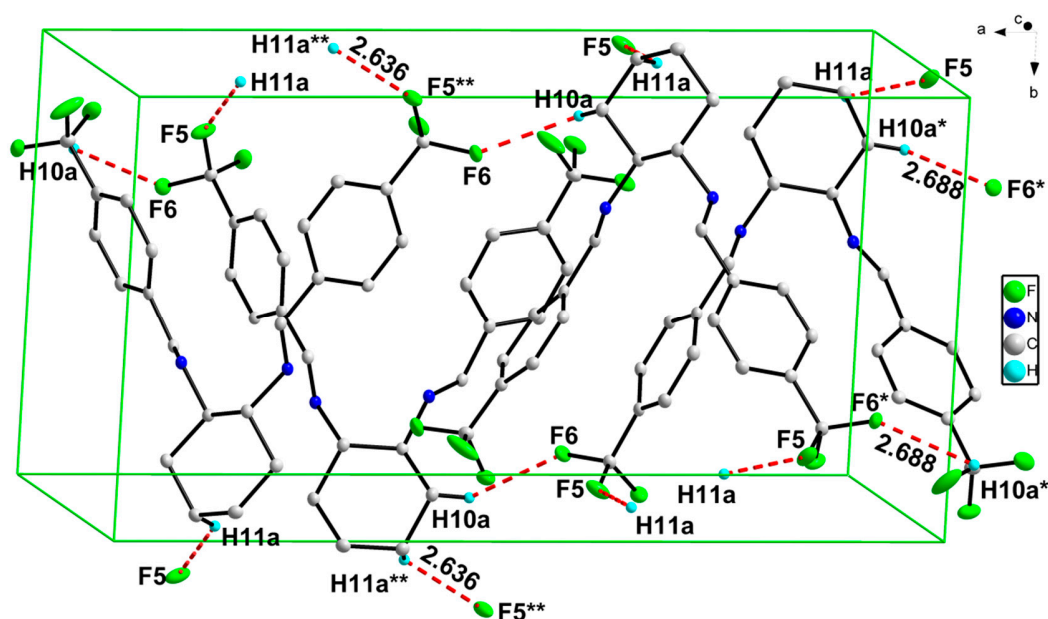

**Figure S2.** The crystal packing of **L2** viewed between the **a**, **b**, **c** axis. Red dashed lines indicate system (intermolecular) hydrogen-bond. Hydrogen atoms are omitted for clarity. Symmetry code: (\*)  $0.5+x, 1-y, +z$ ; (\*\*)  $0.5-x, -1+y, -0.5+z$

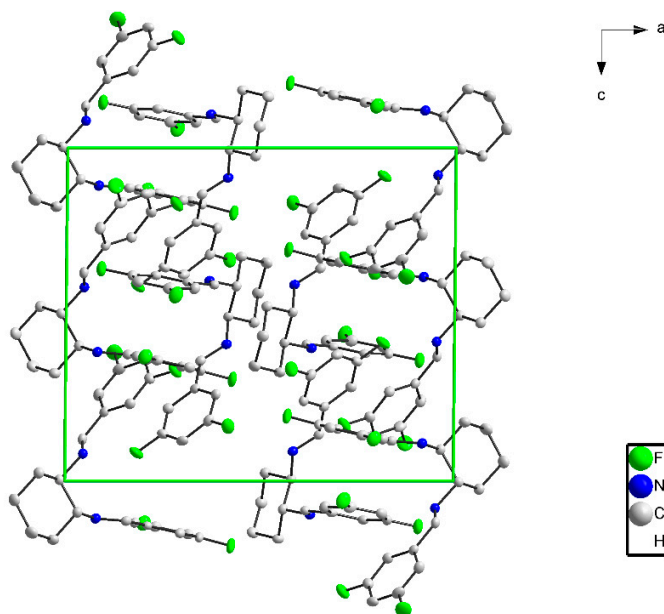

**Figure S3.** The crystal packing of **L3** viewed between the **a**, **b**, **c** axis. Red dashed lines indicate system (intermolecular) hydrogen-bond. Hydrogen atoms are omitted for clarity.

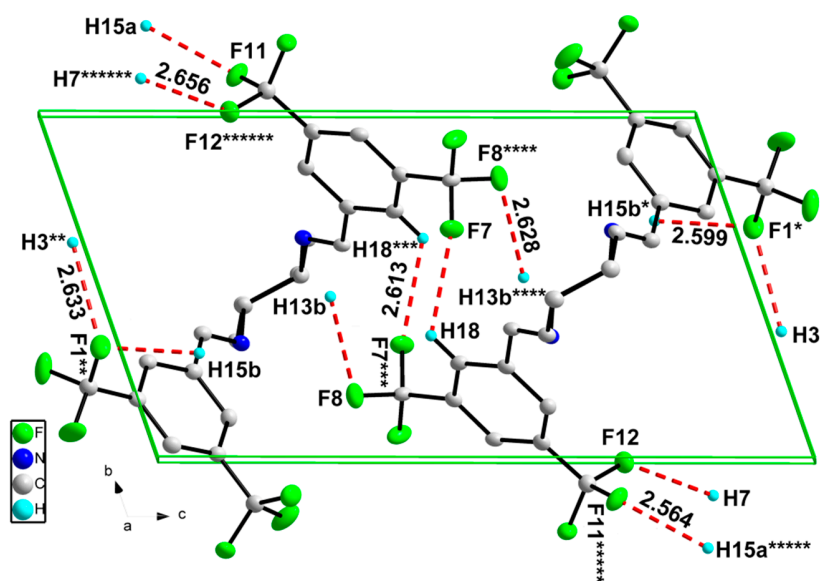

**Figure S4.** The crystal packing of **L4** viewed along the *a* axis. Red dashed lines indicate system (intermolecular) hydrogen-bond. Hydrogen atoms are omitted for clarity. Symmetry code: (\*) $1+x,y,z$ ; (\*\*)  $1-x,1-y,-z$ ; (\*\*\*)  $1-x,1-y,1-z$ ; (\*\*\*\*)  $2-x,1-y,1-z$ ; (\*\*\*\*\*)  $x,-1+y,z$ ; (\*\*\*\*\*)  $x,-1+y,z$ .

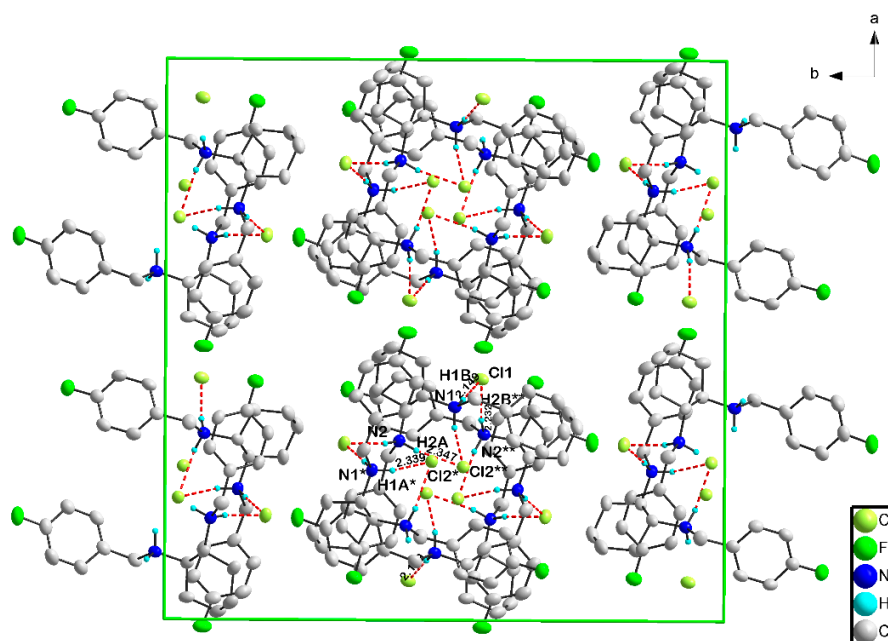

**Figure S5.** The crystal packing of **L11** viewed between the **a**, **b**, **c** axis. Red dashed lines indicate system (intermolecular) hydrogen-bond. Hydrogen atoms are omitted for clarity. Symmetry code: (\*) $1+x,y,z$ ; (\*\*) $1-x,1-y,-z$ .

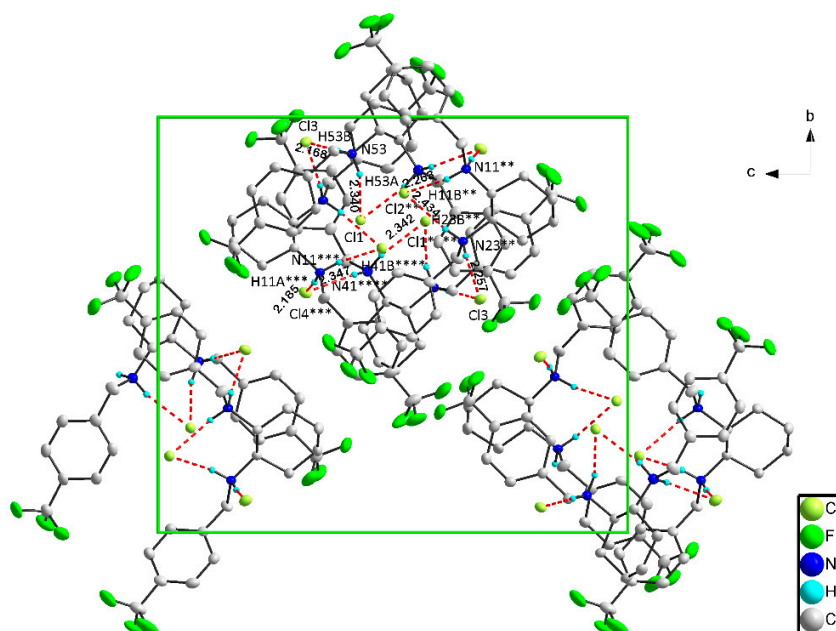

**Figure S6.** The crystal packing of **L12** viewed between the **a**, **b**, **c** axis. Red dashed lines indicate system (intermolecular) hydrogen-bond. Hydrogen atoms are omitted for clarity. Symmetry code: (\*) $1+x,y,z$ ; (\*\*) $1-x,1-y,-z$ ; (\*\*\*) $1-x,1-y,1-z$ .

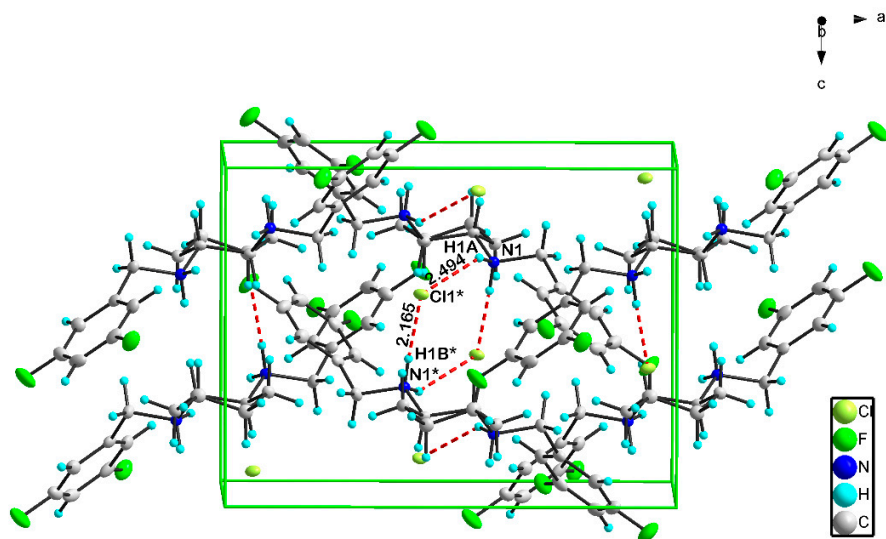

**Figure S7.** The crystal packing of **L13** viewed between the **a**, **b**, **c** axis. Red dashed lines indicate system (intermolecular) hydrogen-bond. Hydrogen atoms are omitted for clarity. Symmetry code: (\*)1+x,+y,+z.

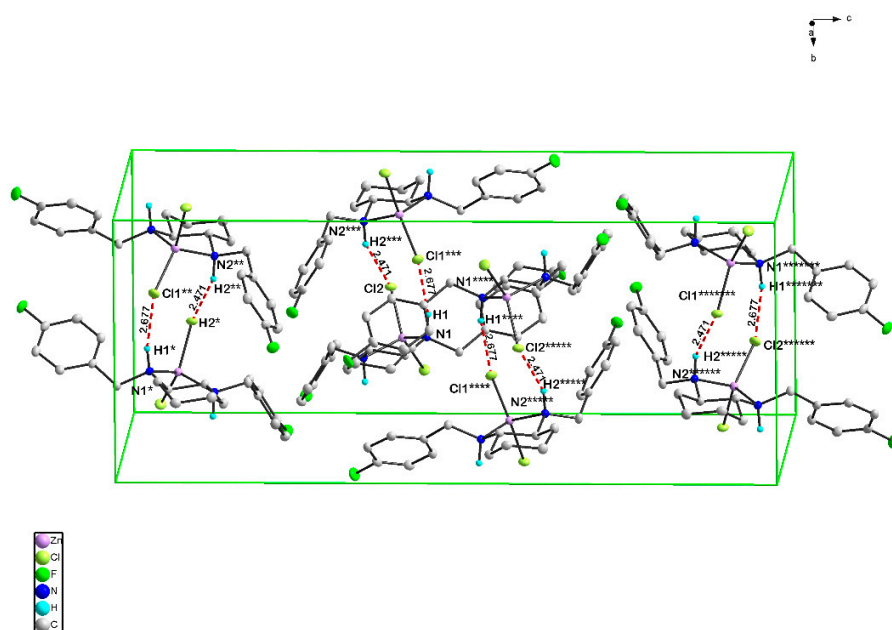

**Figure S8.** The crystal packing of **Zn-L11** viewed between the **a**, **b**, **c** axis. Red dashed lines indicate system (intermolecular) hydrogen-bond. Hydrogen atoms are omitted for clarity. Symmetry code: (\*)1+x,+y,+z; (\*\*)1-x,1-y,-z; (\*\*\*)1-x,1-y,1-z; (\*\*\*\*)2-x,1-y,1-z; (\*\*\*\*\*)x,-1+y,+z; (\*\*\*\*\*)x,-1+y,+z; (\*\*\*\*\*)1/2+x,1-y,+z.



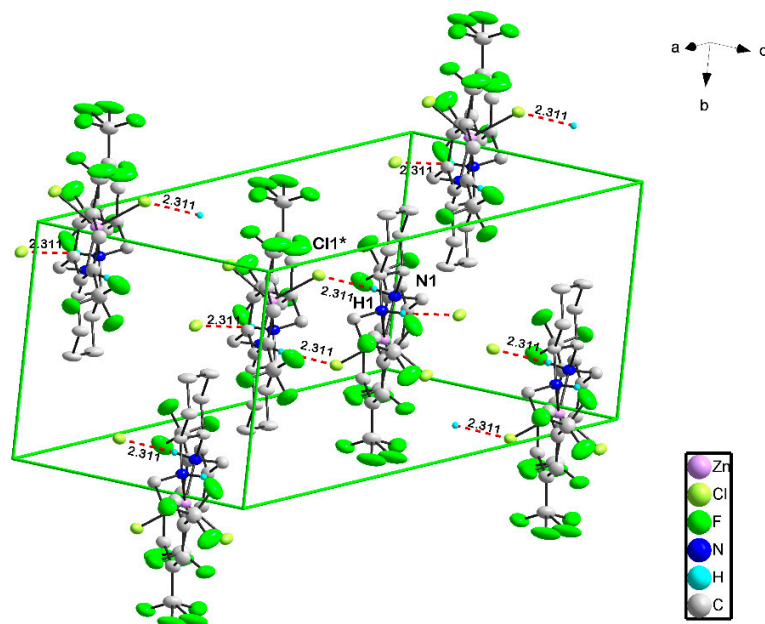

**Figure S11.** The crystal packing of **Zn-L14** viewed between the **a**, **b**, **c** axis. Red dashed lines indicate system (intermolecular) hydrogen-bond. Hydrogen atoms are omitted for clarity. Symmetry code: (\*)1+x,y,z.
