# Supplementary figures and images for: Antimicrobially Active Zn(II) Complexes of Reduced Schiff Bases Derived from Cyclohexane-1,2-diamine and Fluorinated Benzaldehydes—Synthesis, Crystal Structure and Bioactivity
Source: MDPI journal article supplement (doi:10.3390/life13071516), 2023-07-06

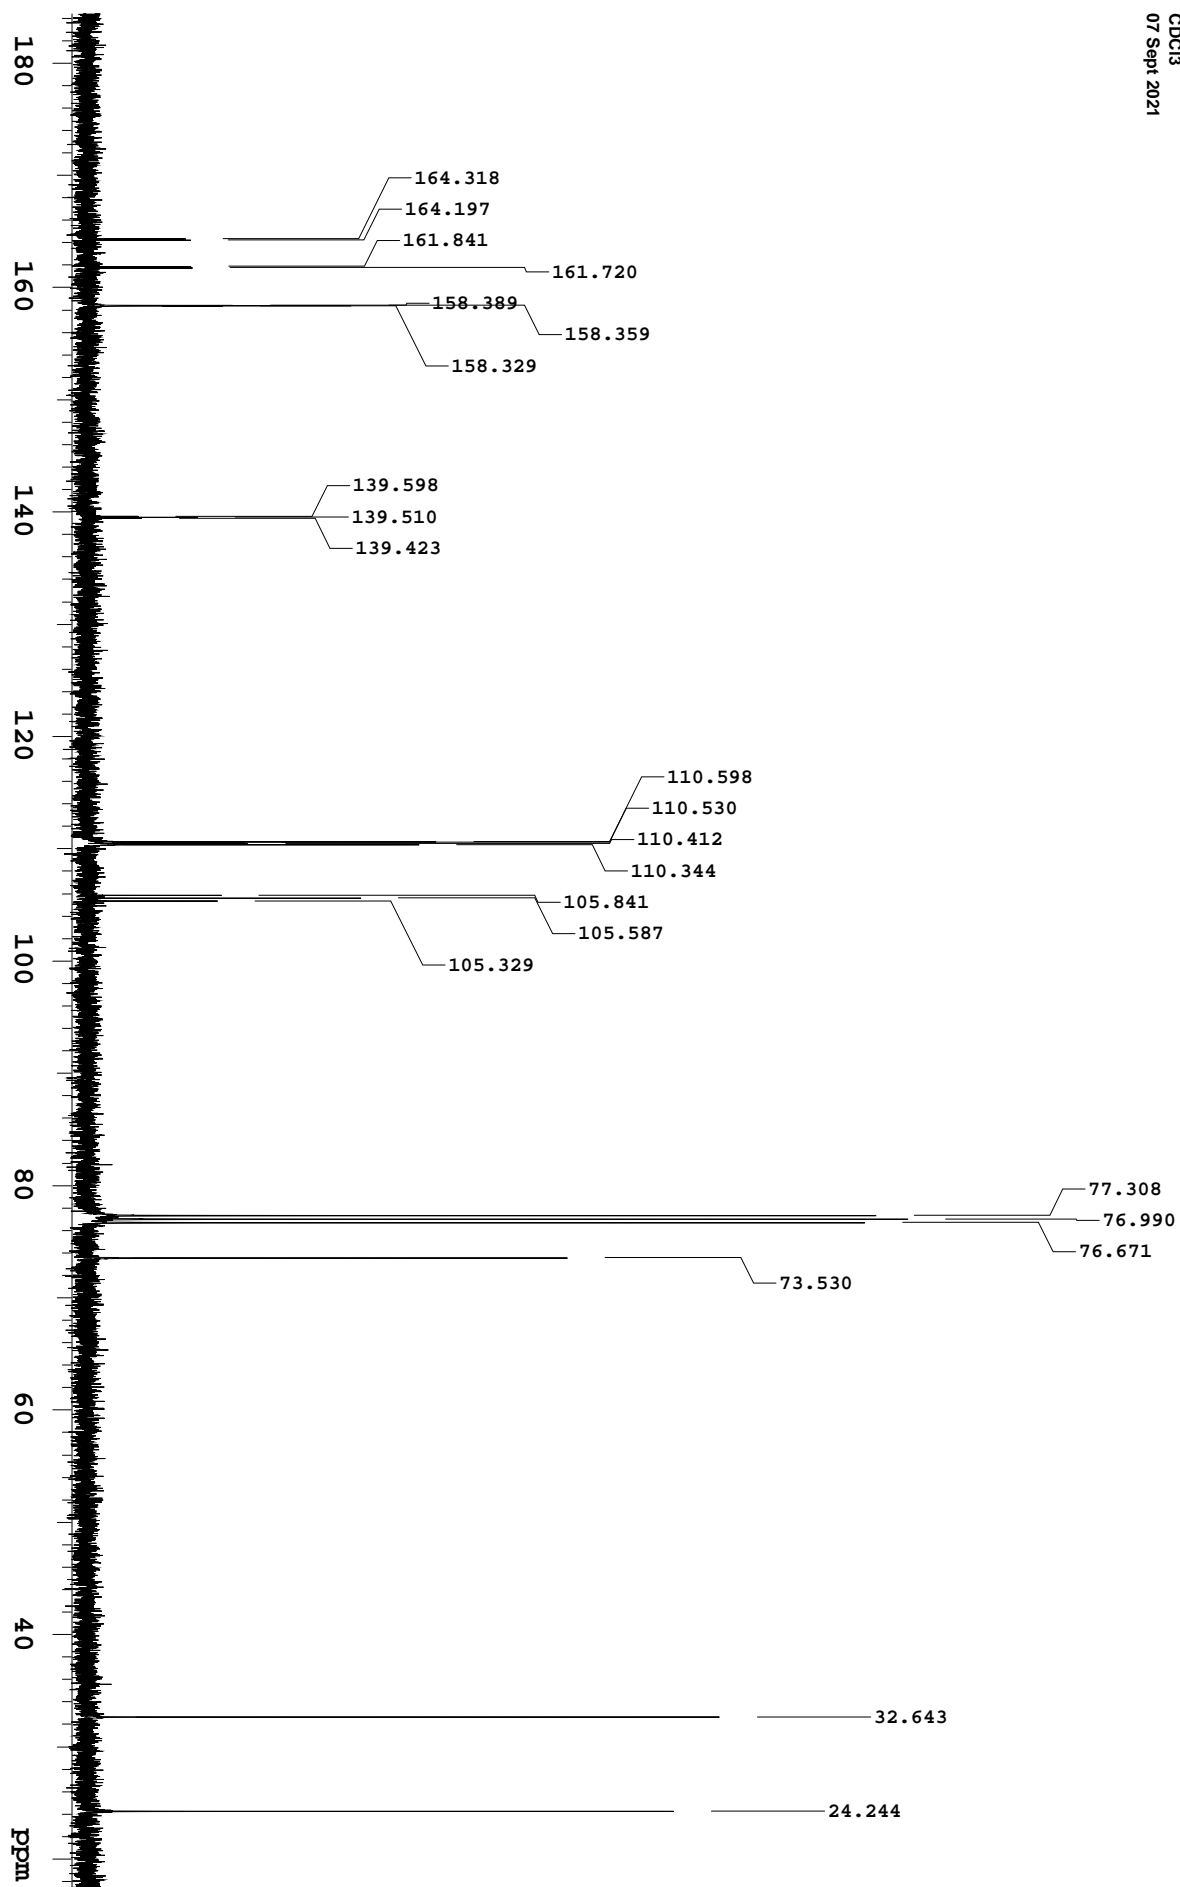

Supplement: s1 [file s1]

<sup>13</sup>C NMR, 100 MHz, Autocx\_DB  
BO-2R3-redHCl  
CD3OD  
08 Sept 2021

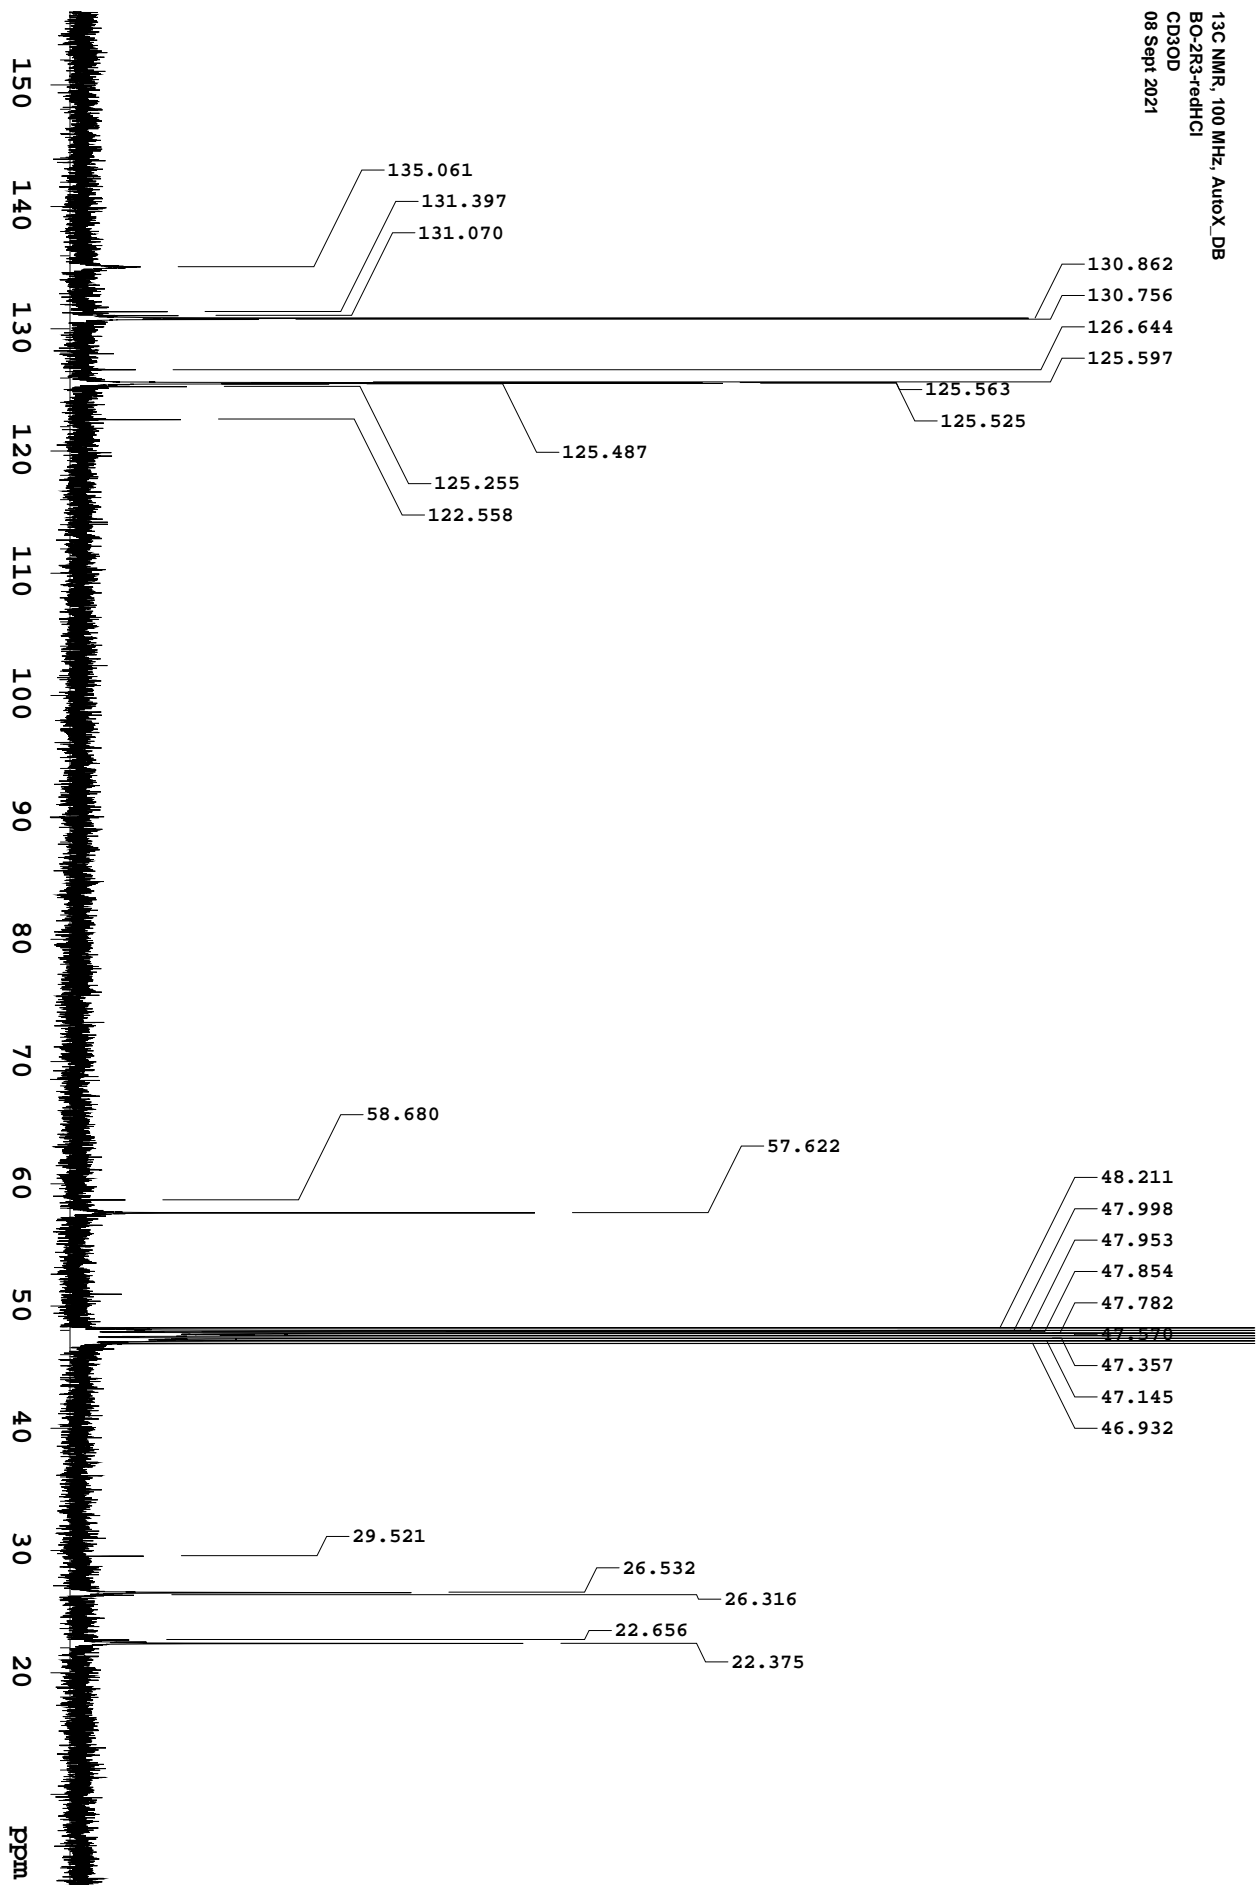

Plotname: CARBON\_01\_plot01

Supplement: s1 [file s1]

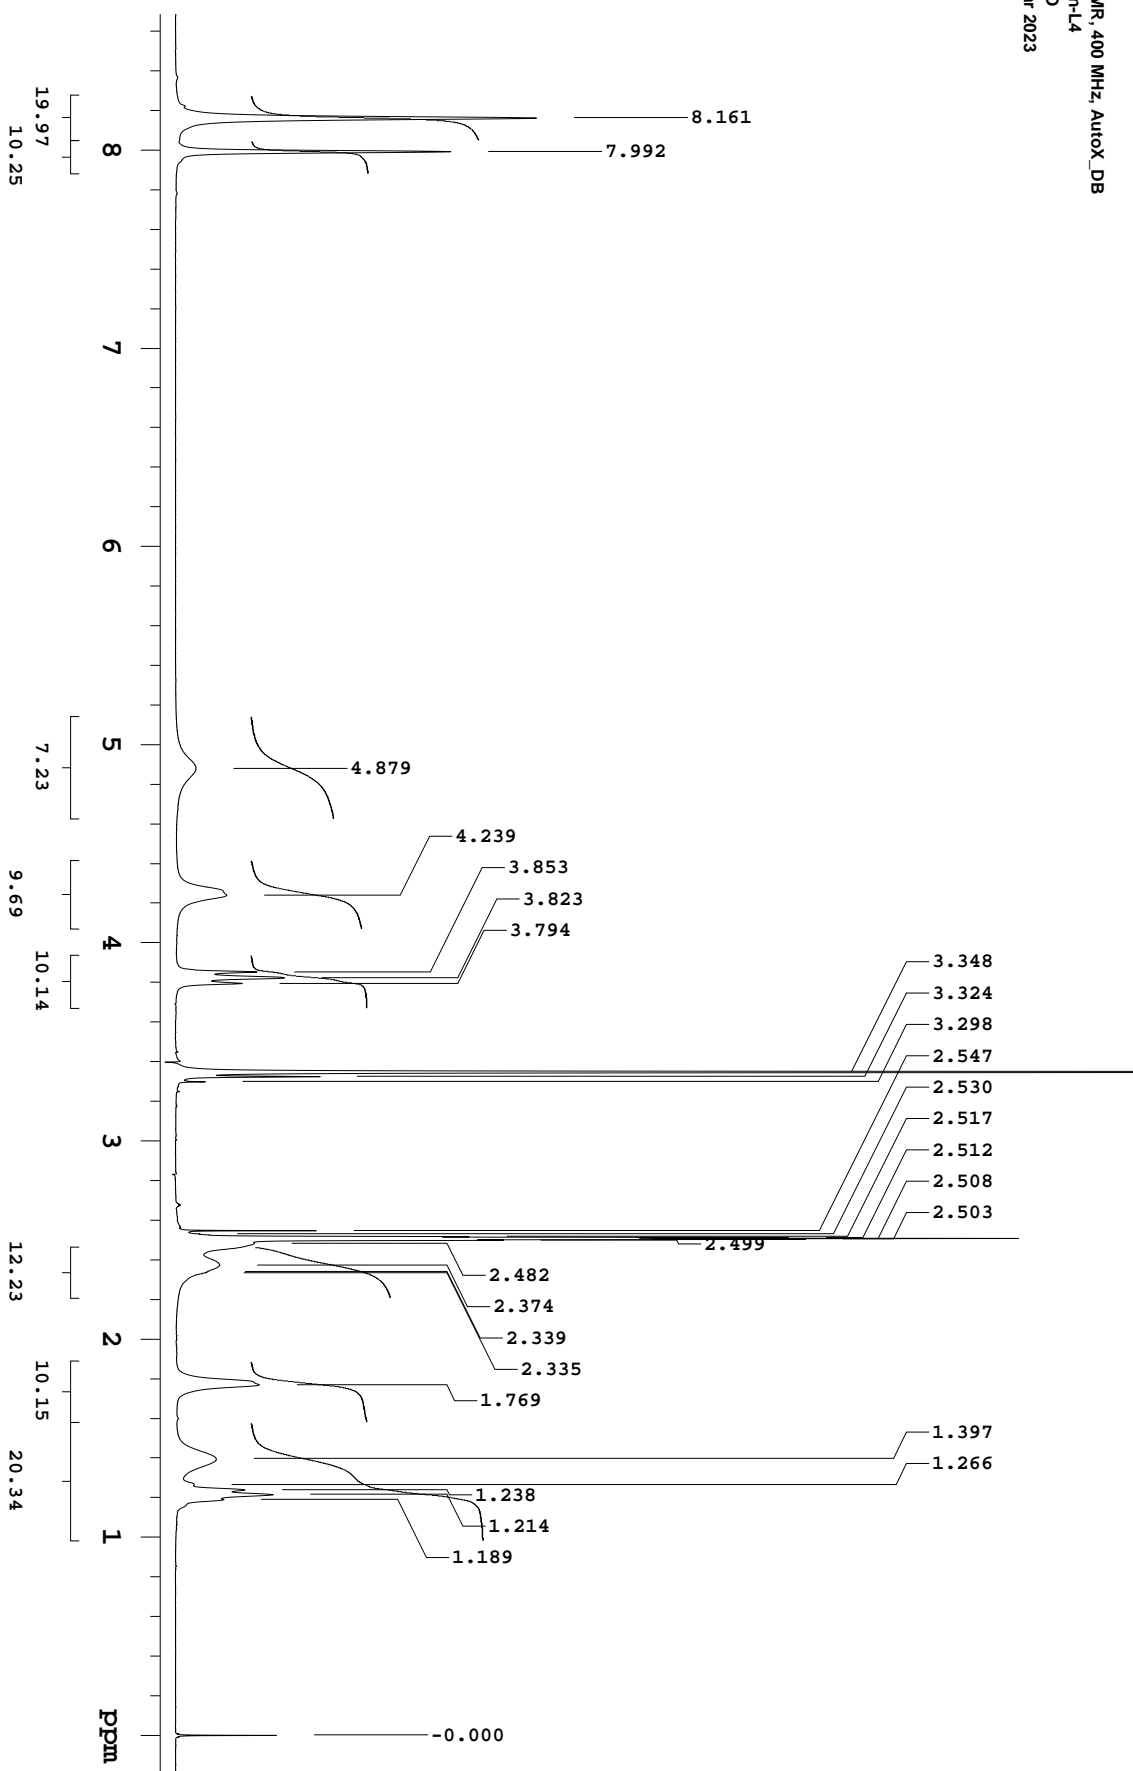

Supplement: s1 [file s1]

<sup>13</sup>C NMR, 100 MHz, Autocx\_DB  
BO-2R2-redHCl  
CD3OD  
08 Sept 2021

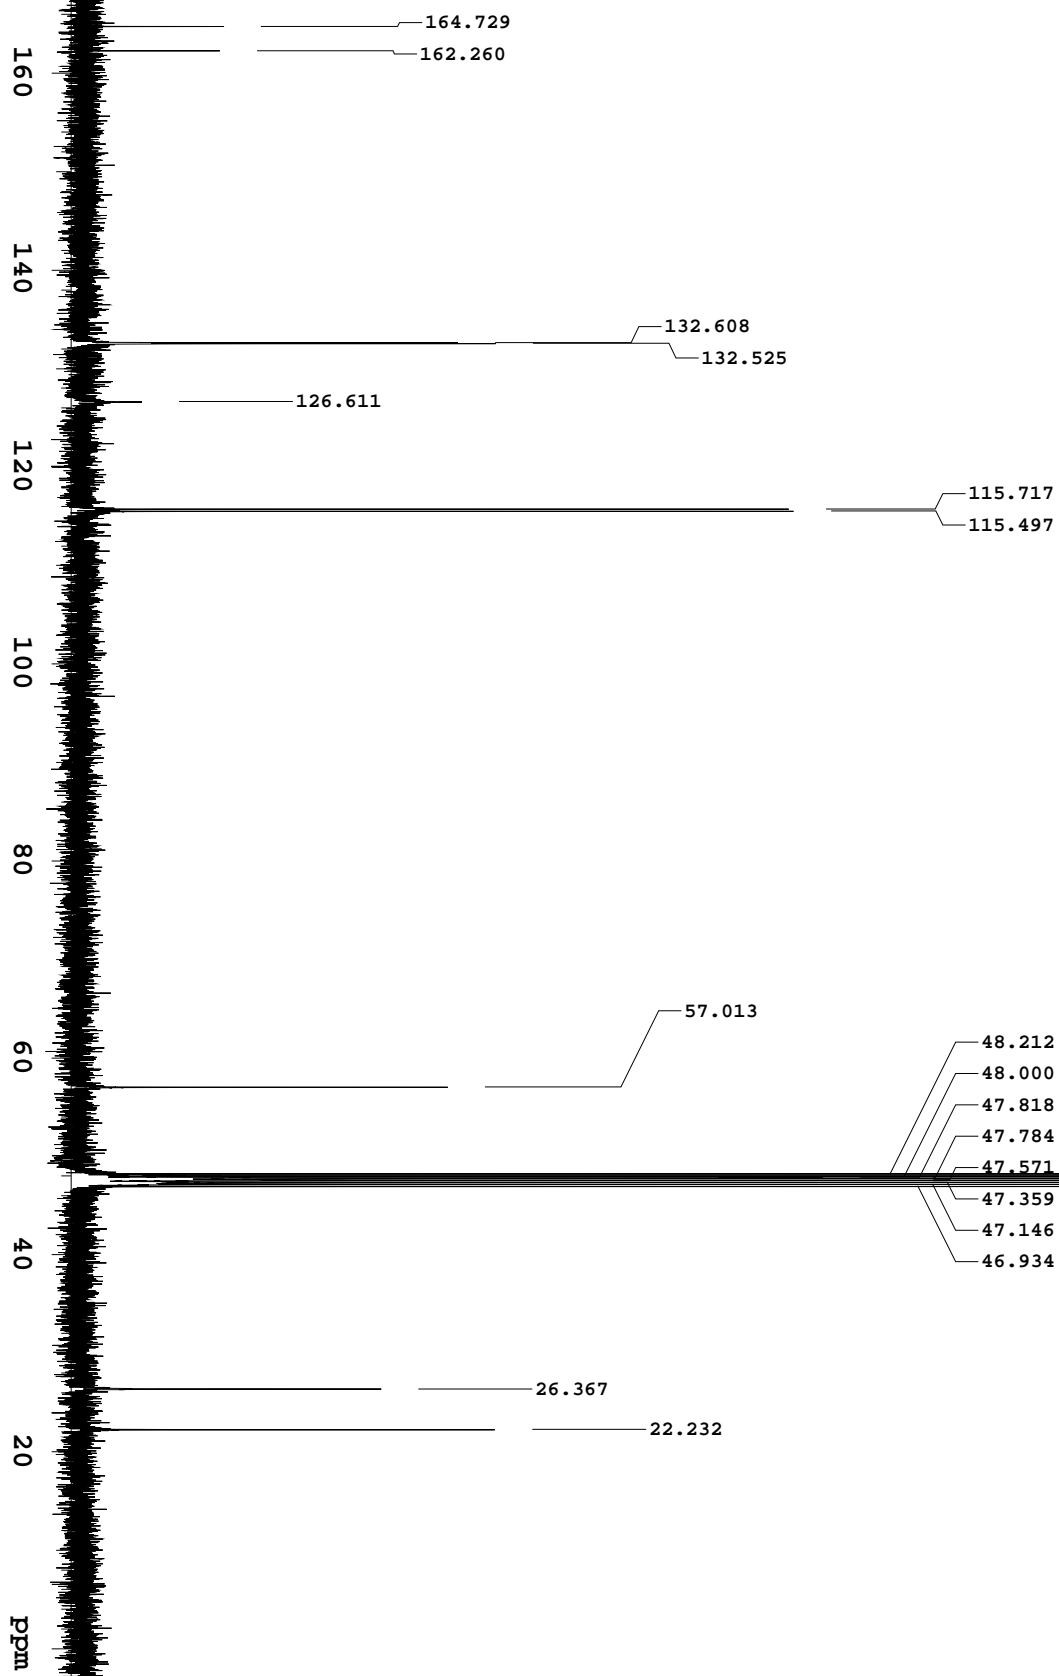

Plotname: CARBON\_01\_plot01

Supplement: s1 [file s1]

<sup>13</sup>C NMR, 100 MHz, AutoX\_DB  
BO-2R5-redHCl  
CD3OD  
08 Sept 2021

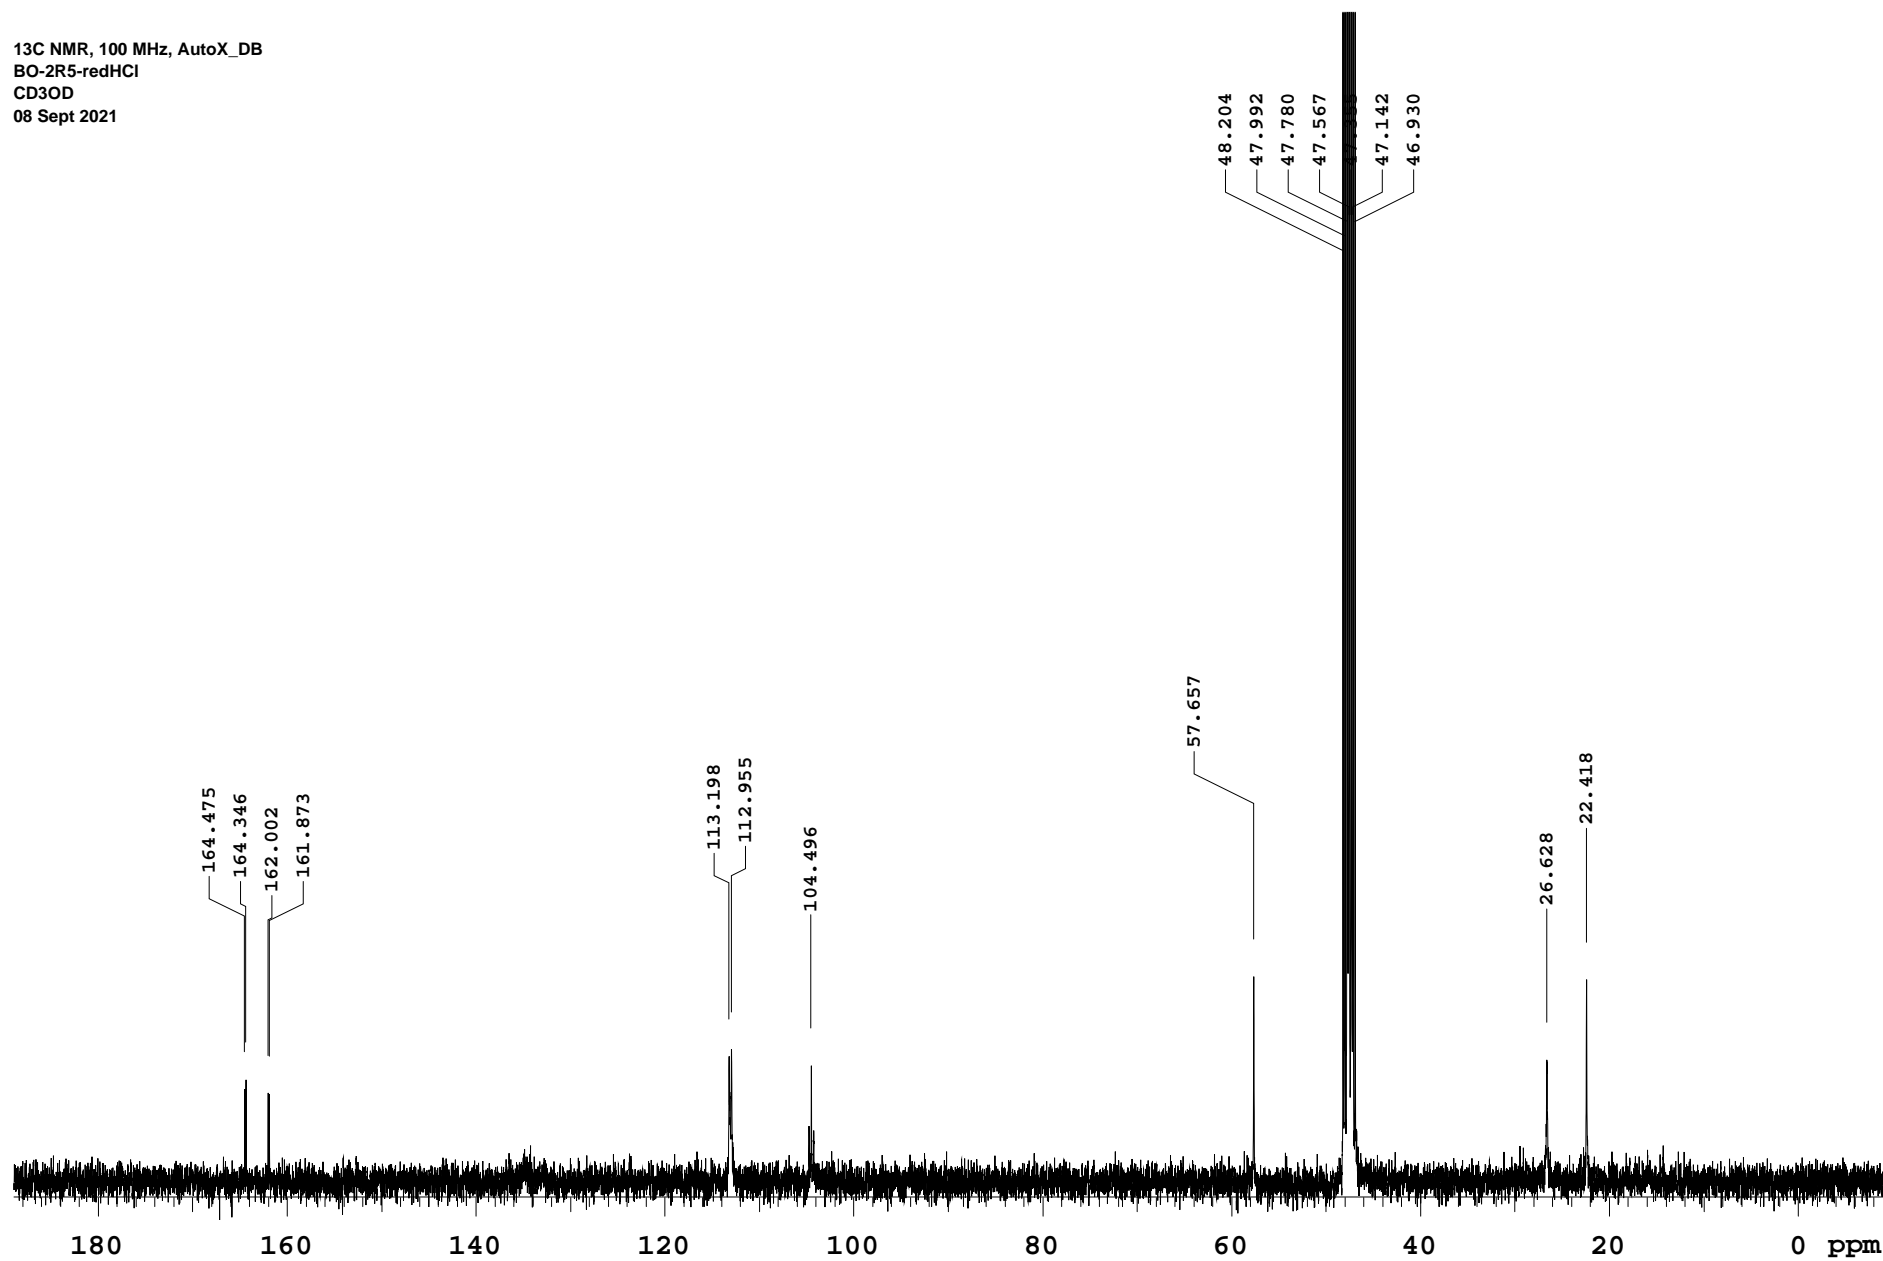

Plotname: CARBON\_01\_plot01

Supplement: s1 [file s1]

<sup>1</sup>H NMR, 400 MHz, AutoX\_DB  
BO-2R5-redHCl  
CD3OD  
08 Sept 2021

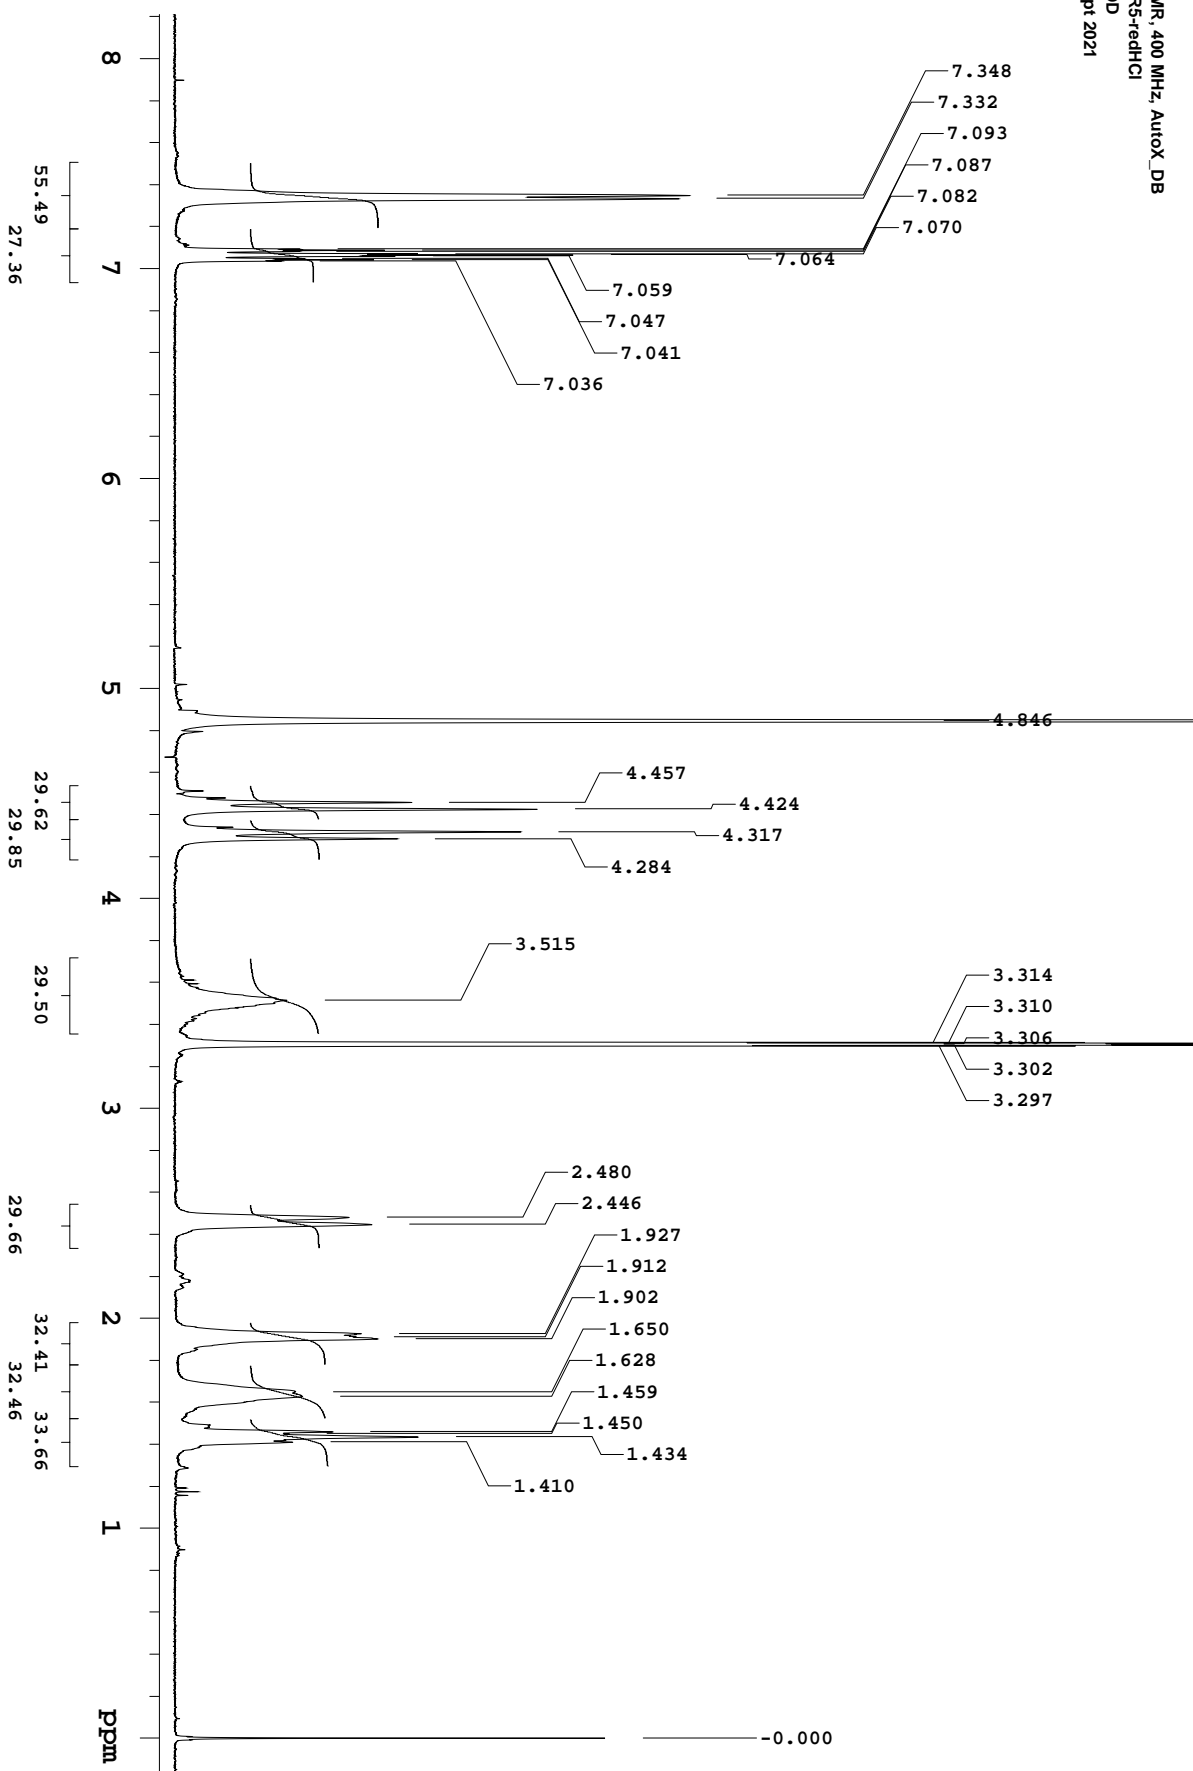

Supplement: s1 [file s1]

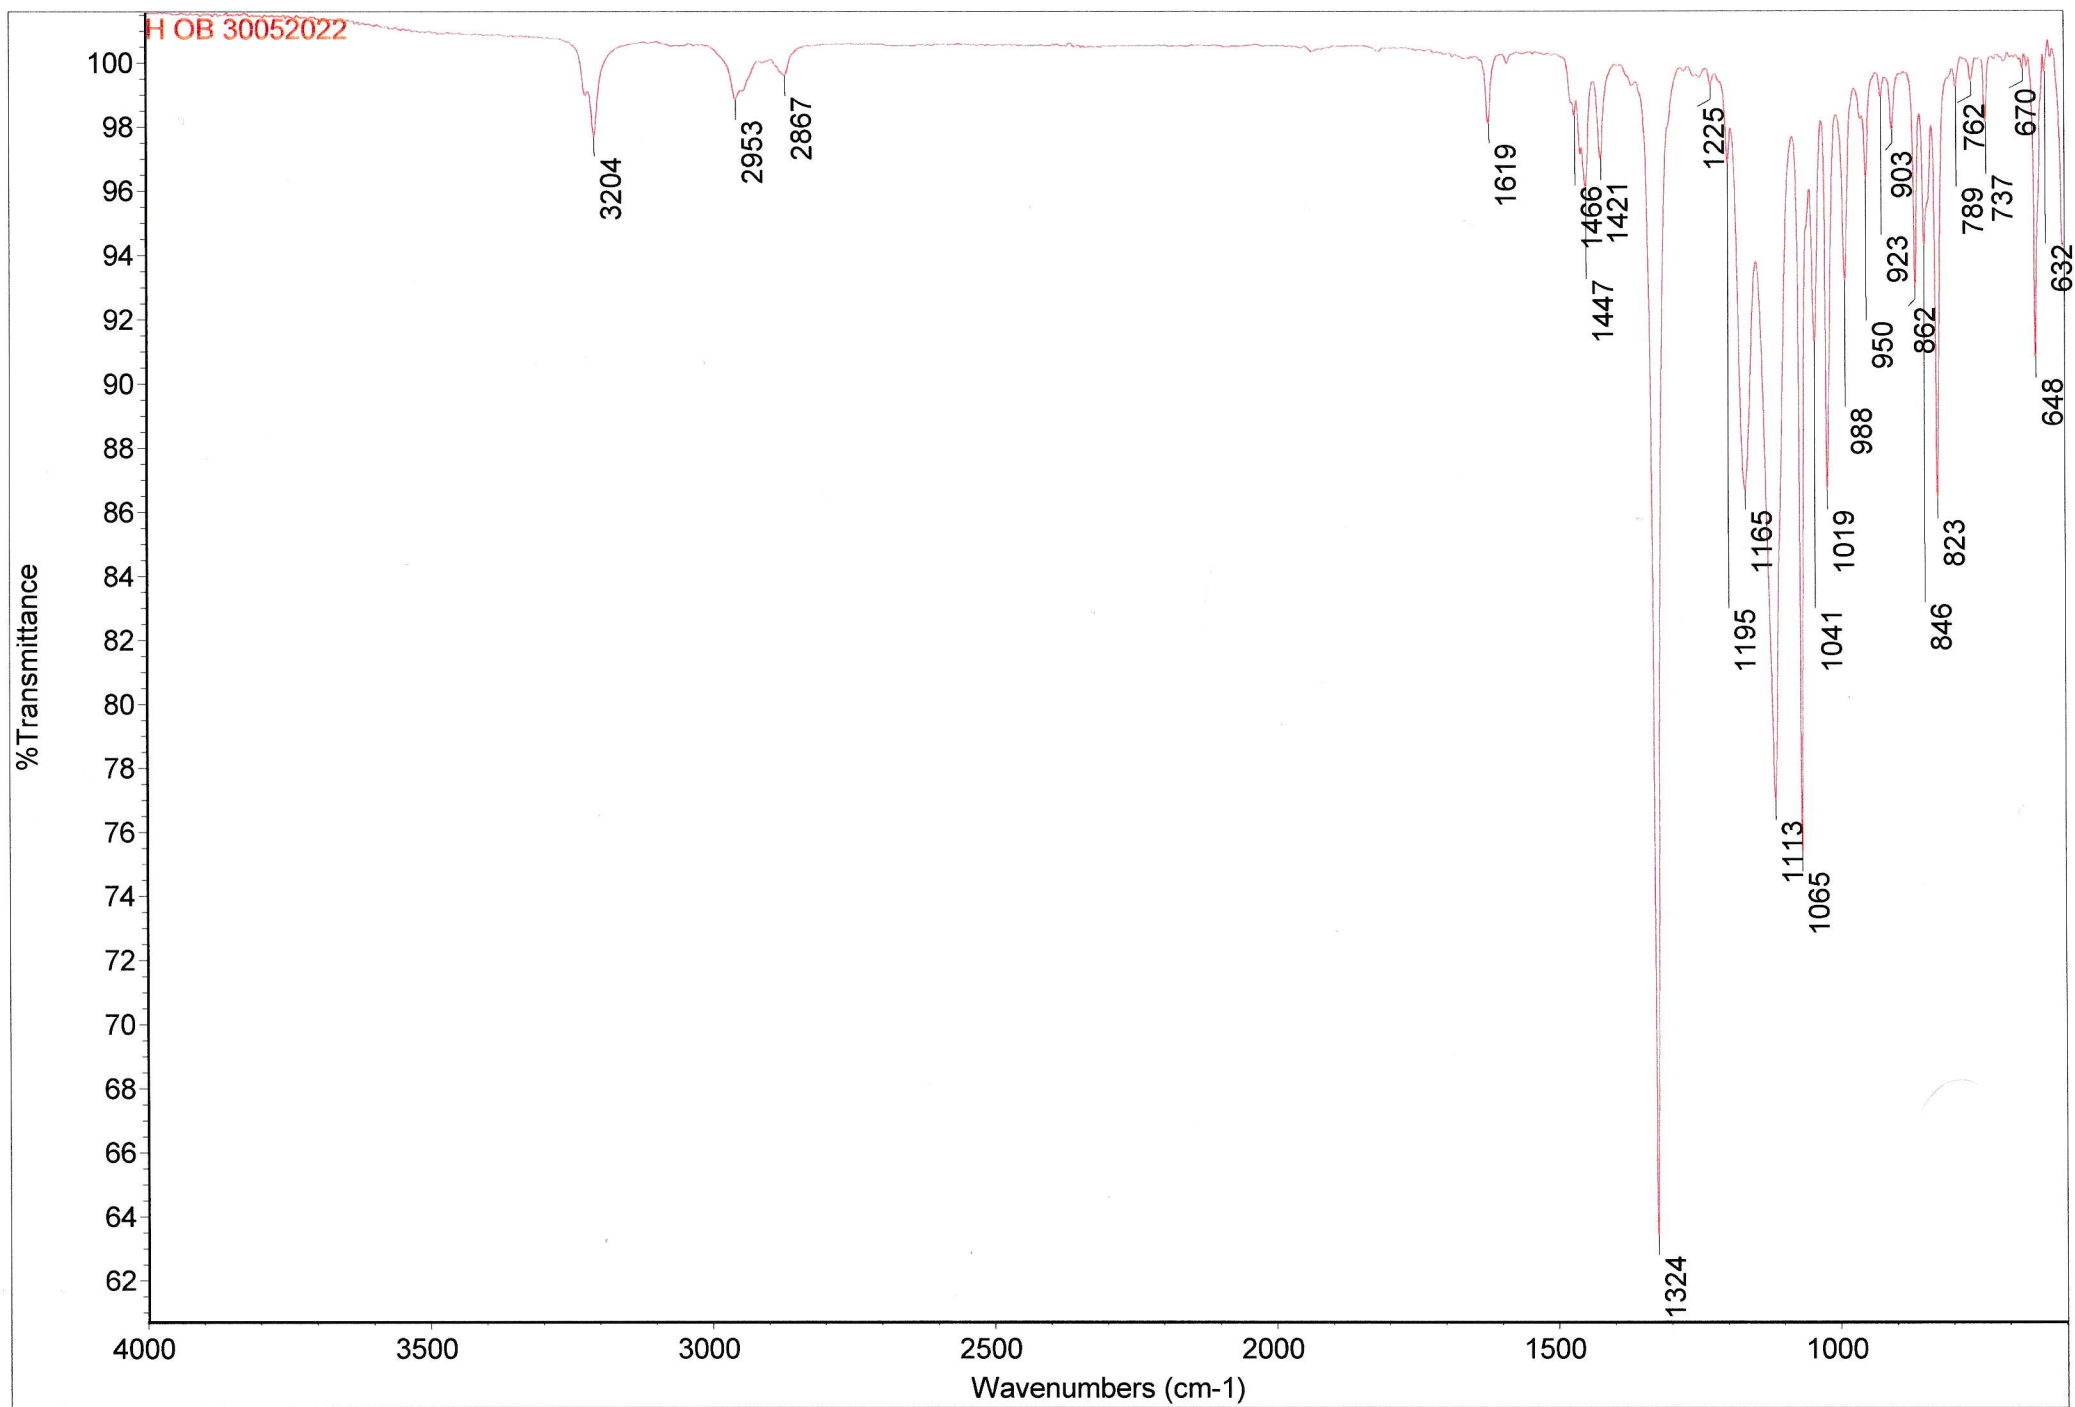

Supplement: s1 [file s1]

<sup>13</sup>C NMR, 100 MHz, AutoX\_DB  
BO-2R2  
CDCl<sub>3</sub>  
11 Nov 2020

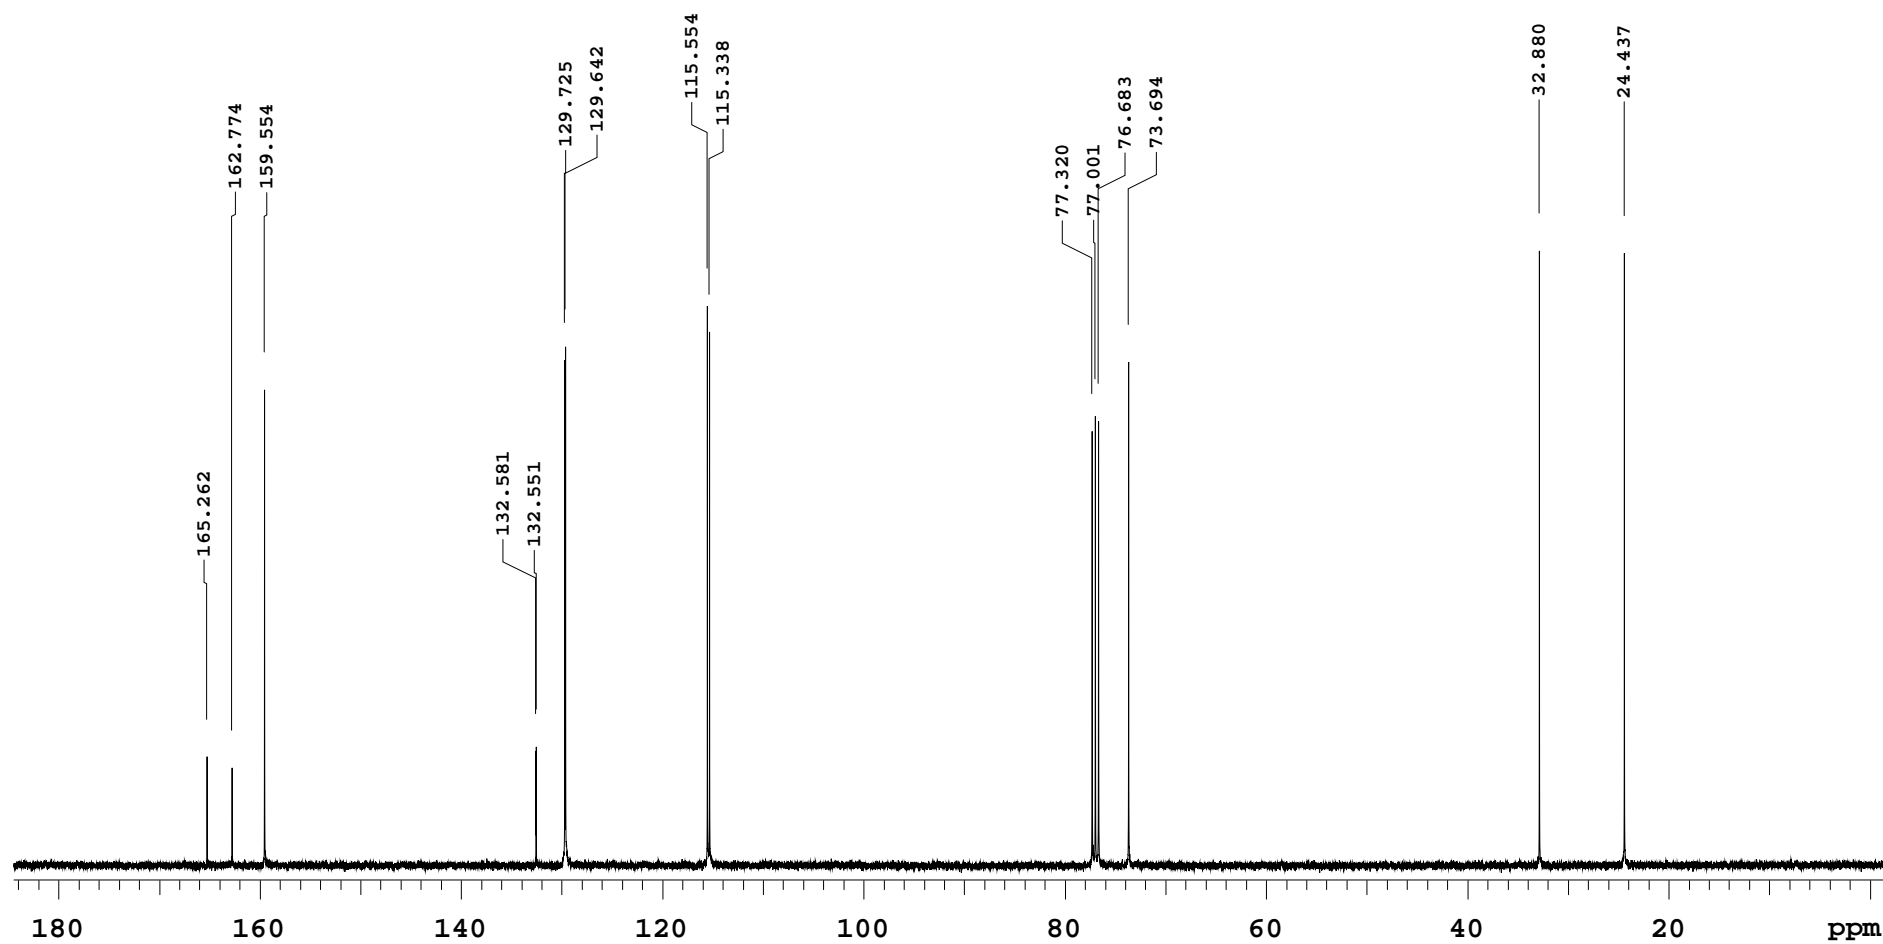

Plotname: CARBON\_01\_plot01

Supplement: s1 [file s1]

<sup>1</sup>H NMR, 400 MHz, AutoX\_DB  
BO-2R3-redHCl  
CD3OD  
08 Sept 2021

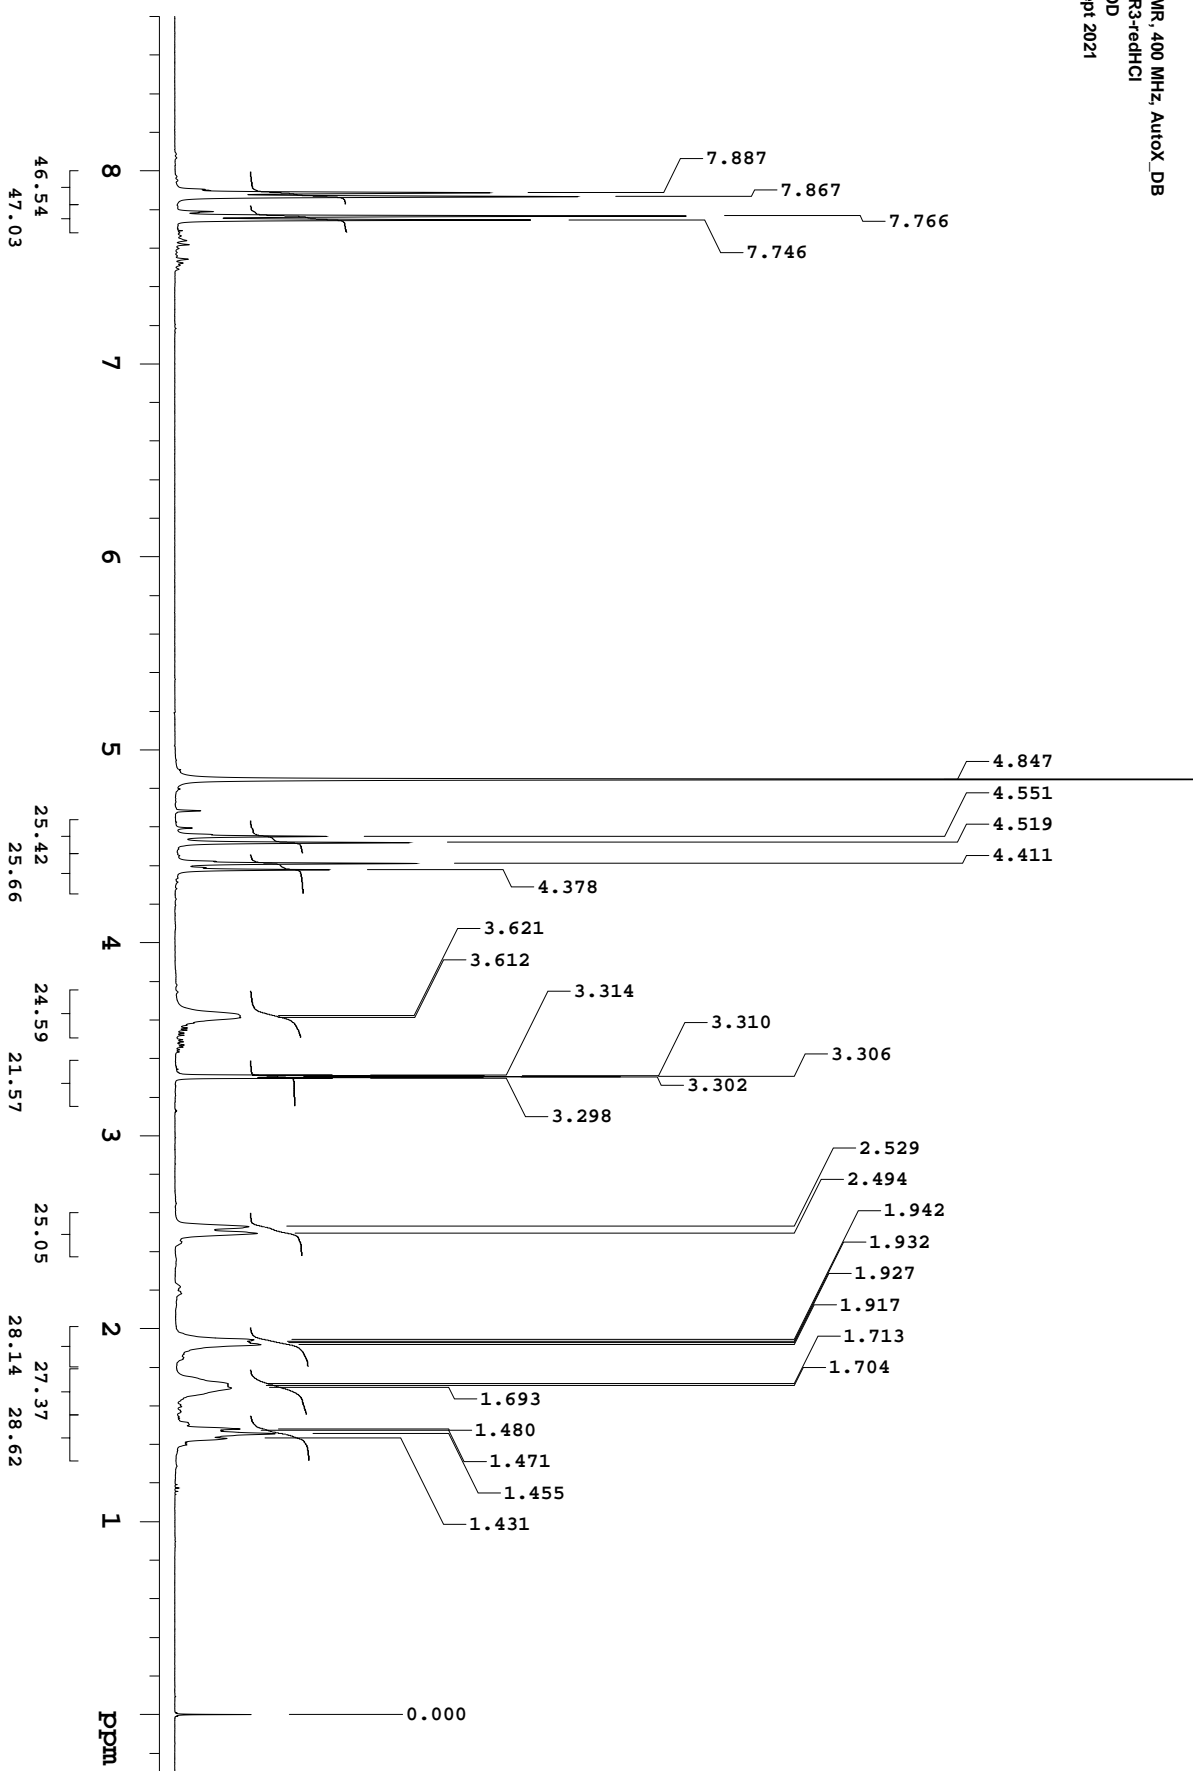

Plotname: PROTON\_01\_plot01

Supplement: s1 [file s1]

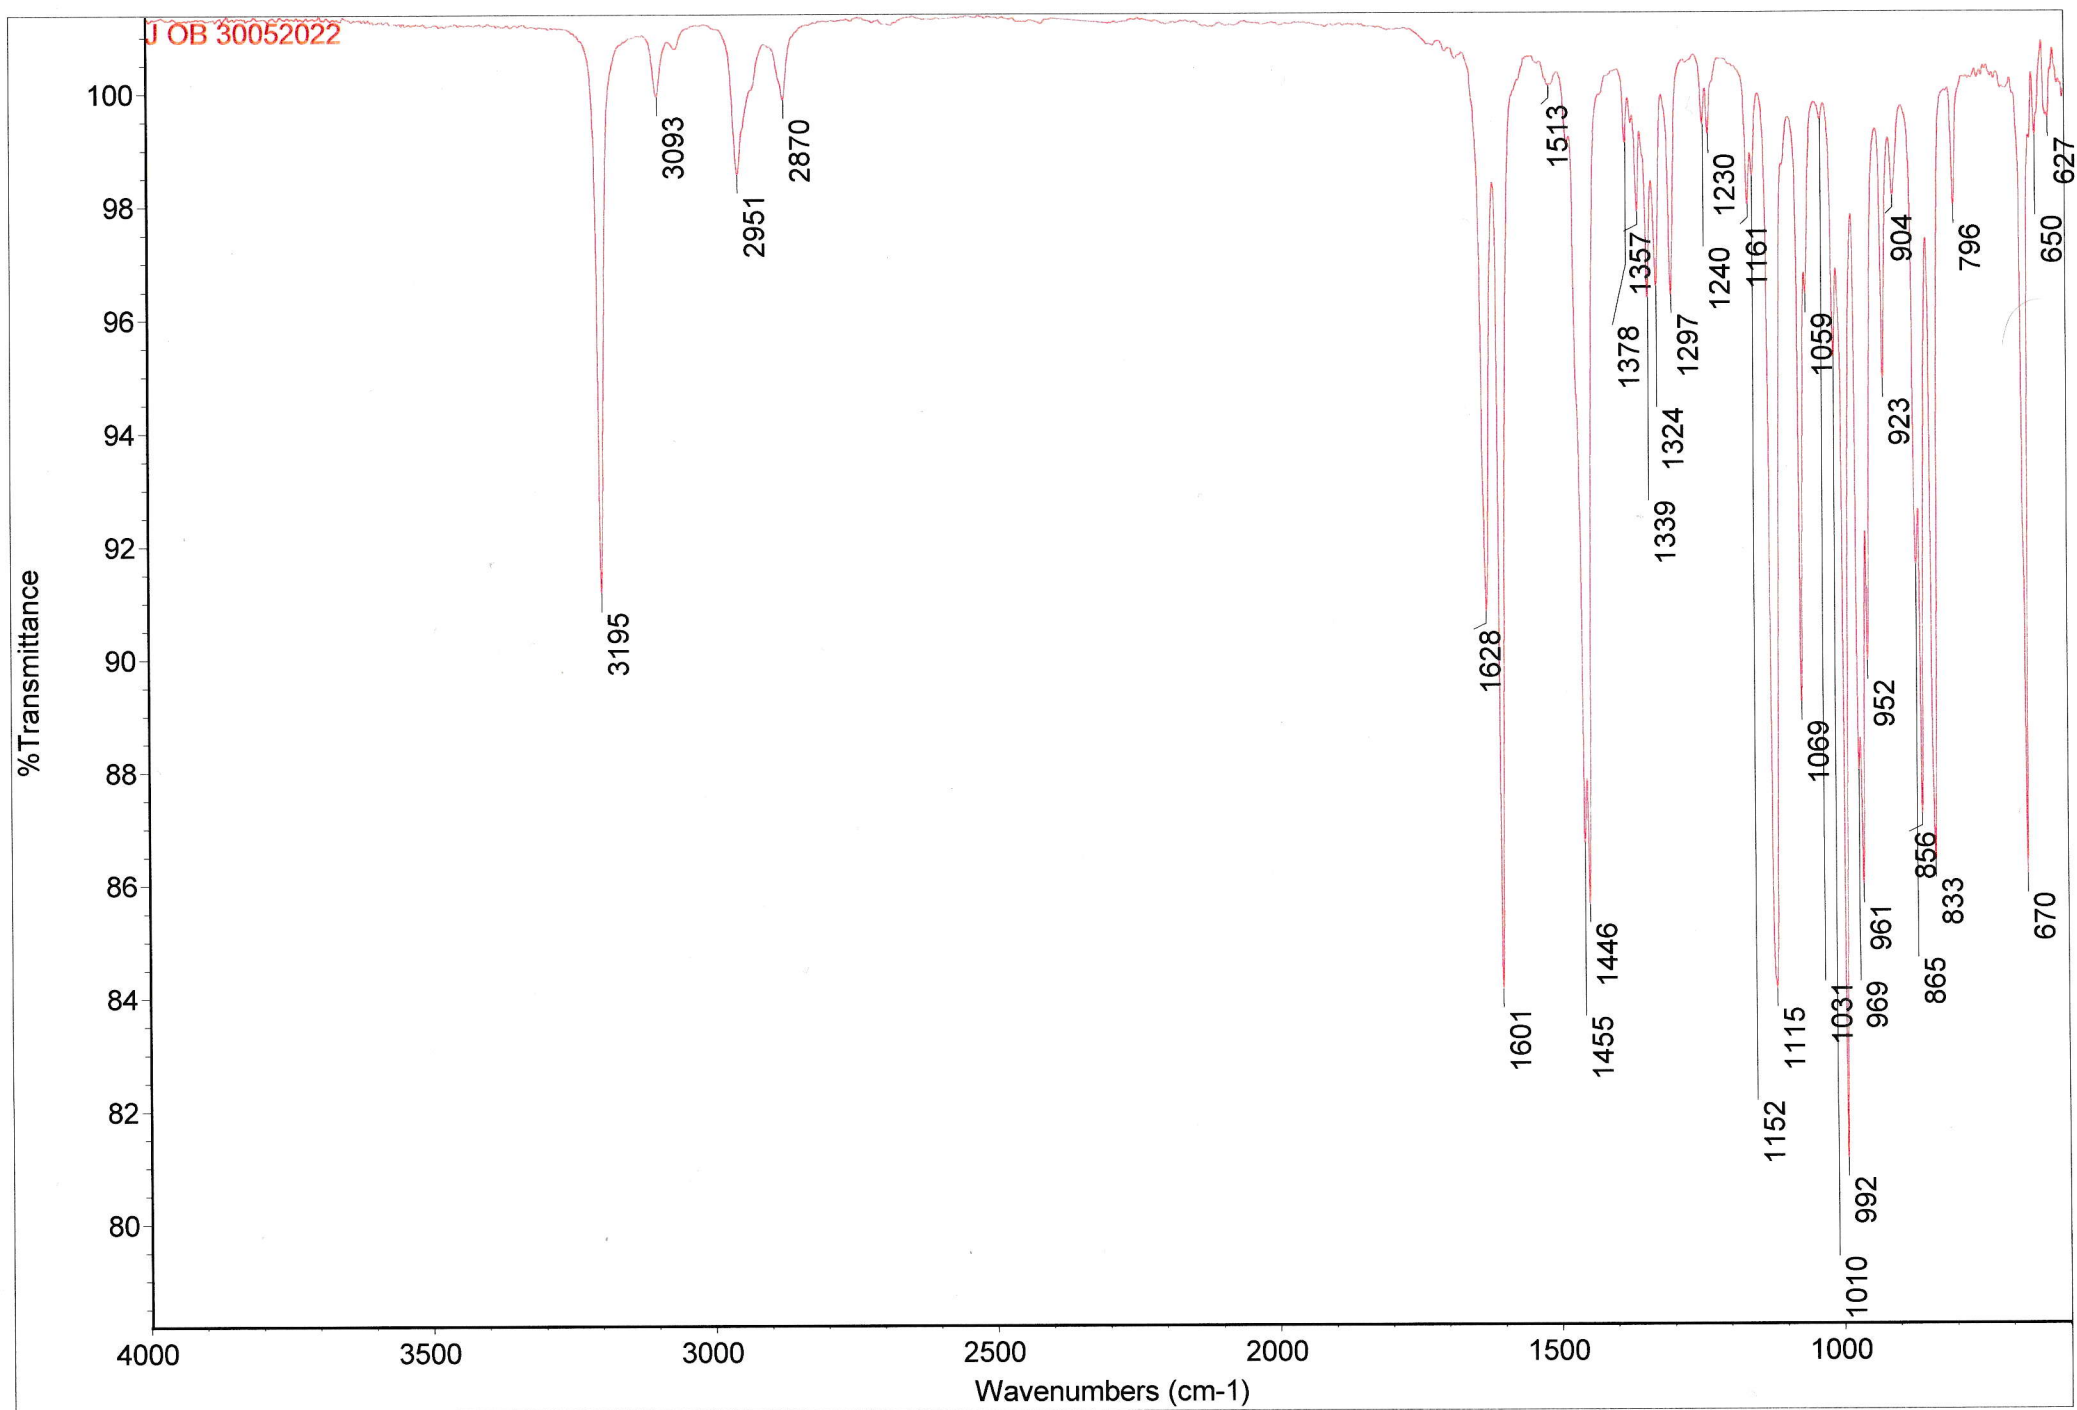

Supplement: s1 [file s1]

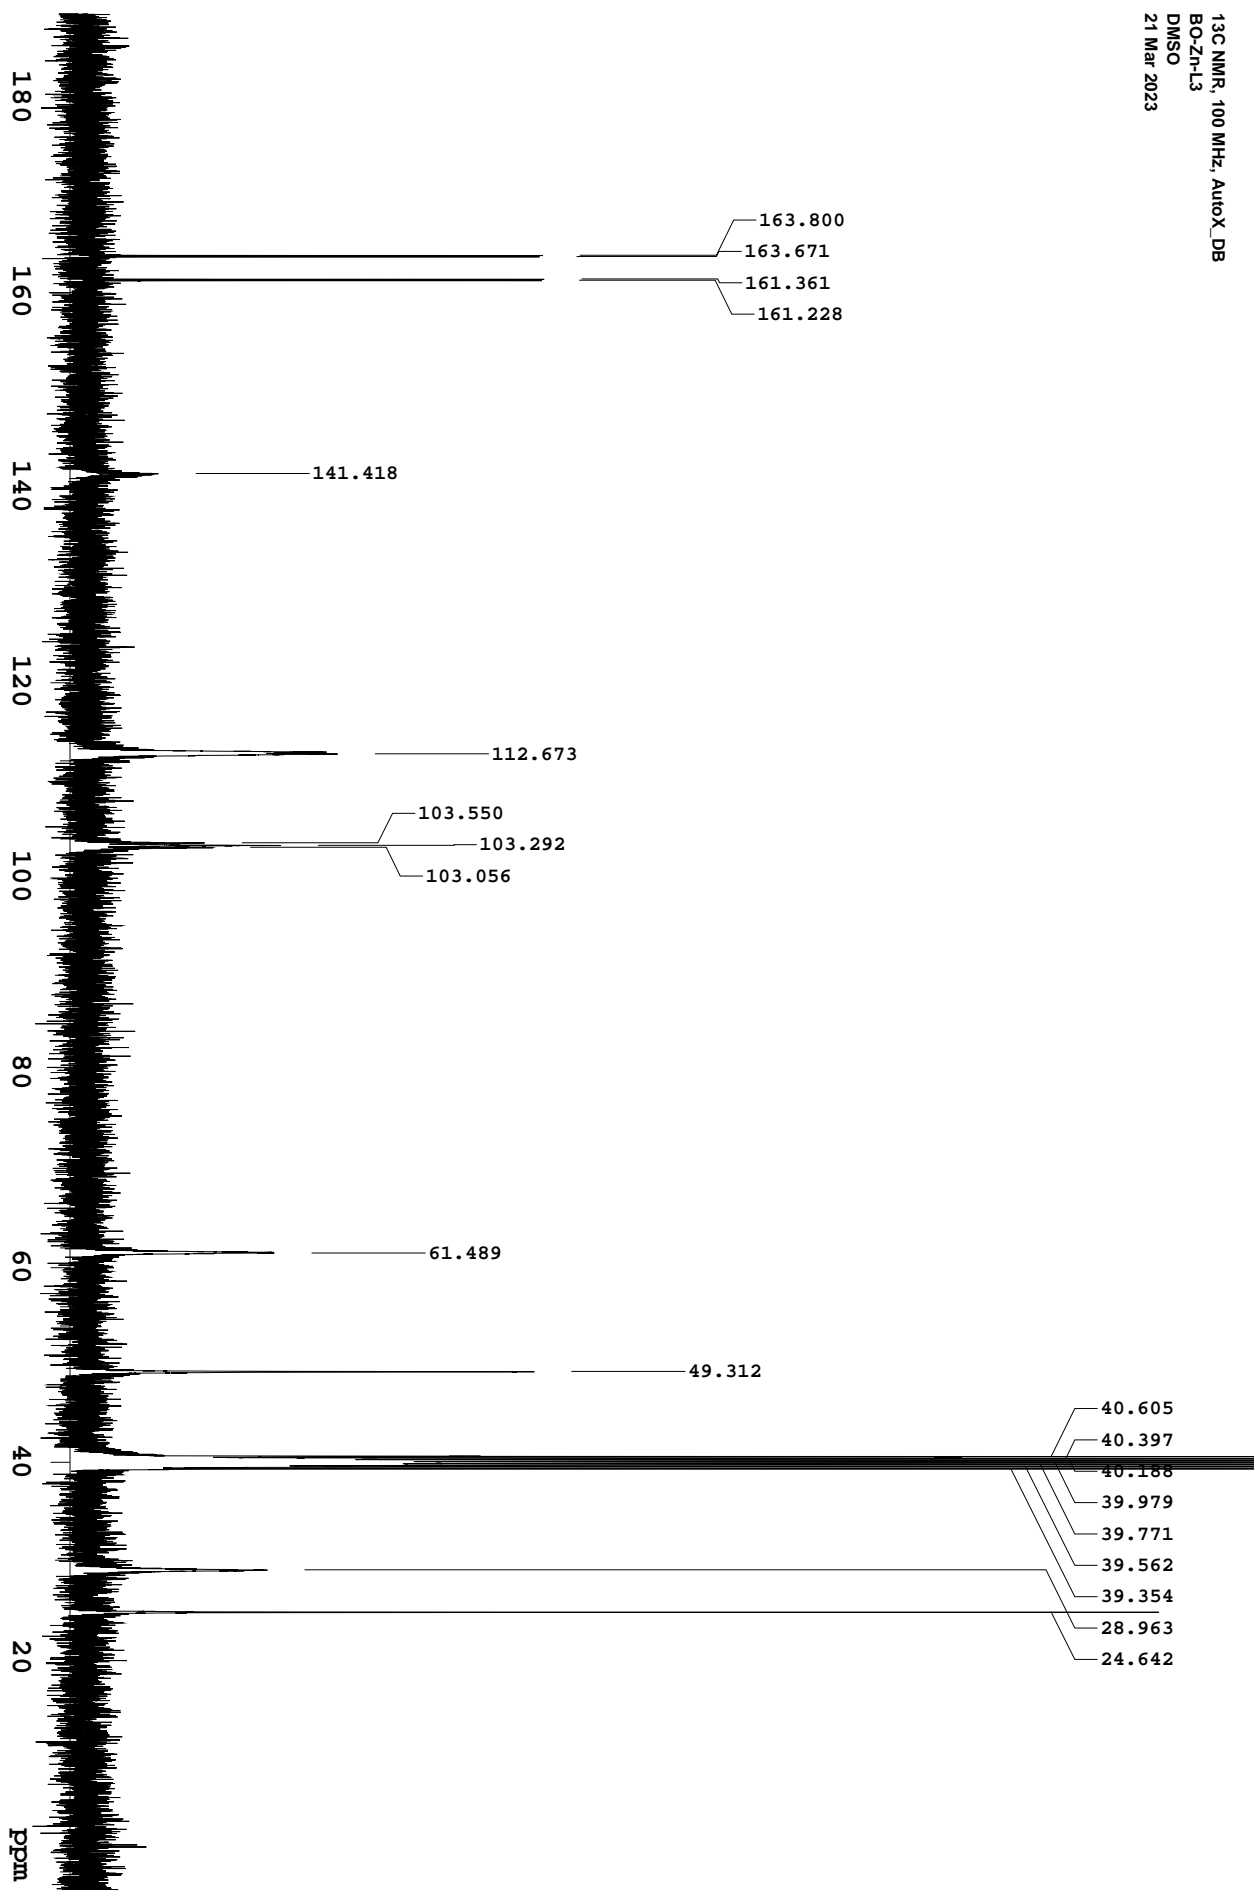

Supplement: s1 [file s1]

<sup>1</sup>H NMR, 400 MHz, AutoX\_DB  
BO-Zn-L2  
DMSO  
21 Mar 2023

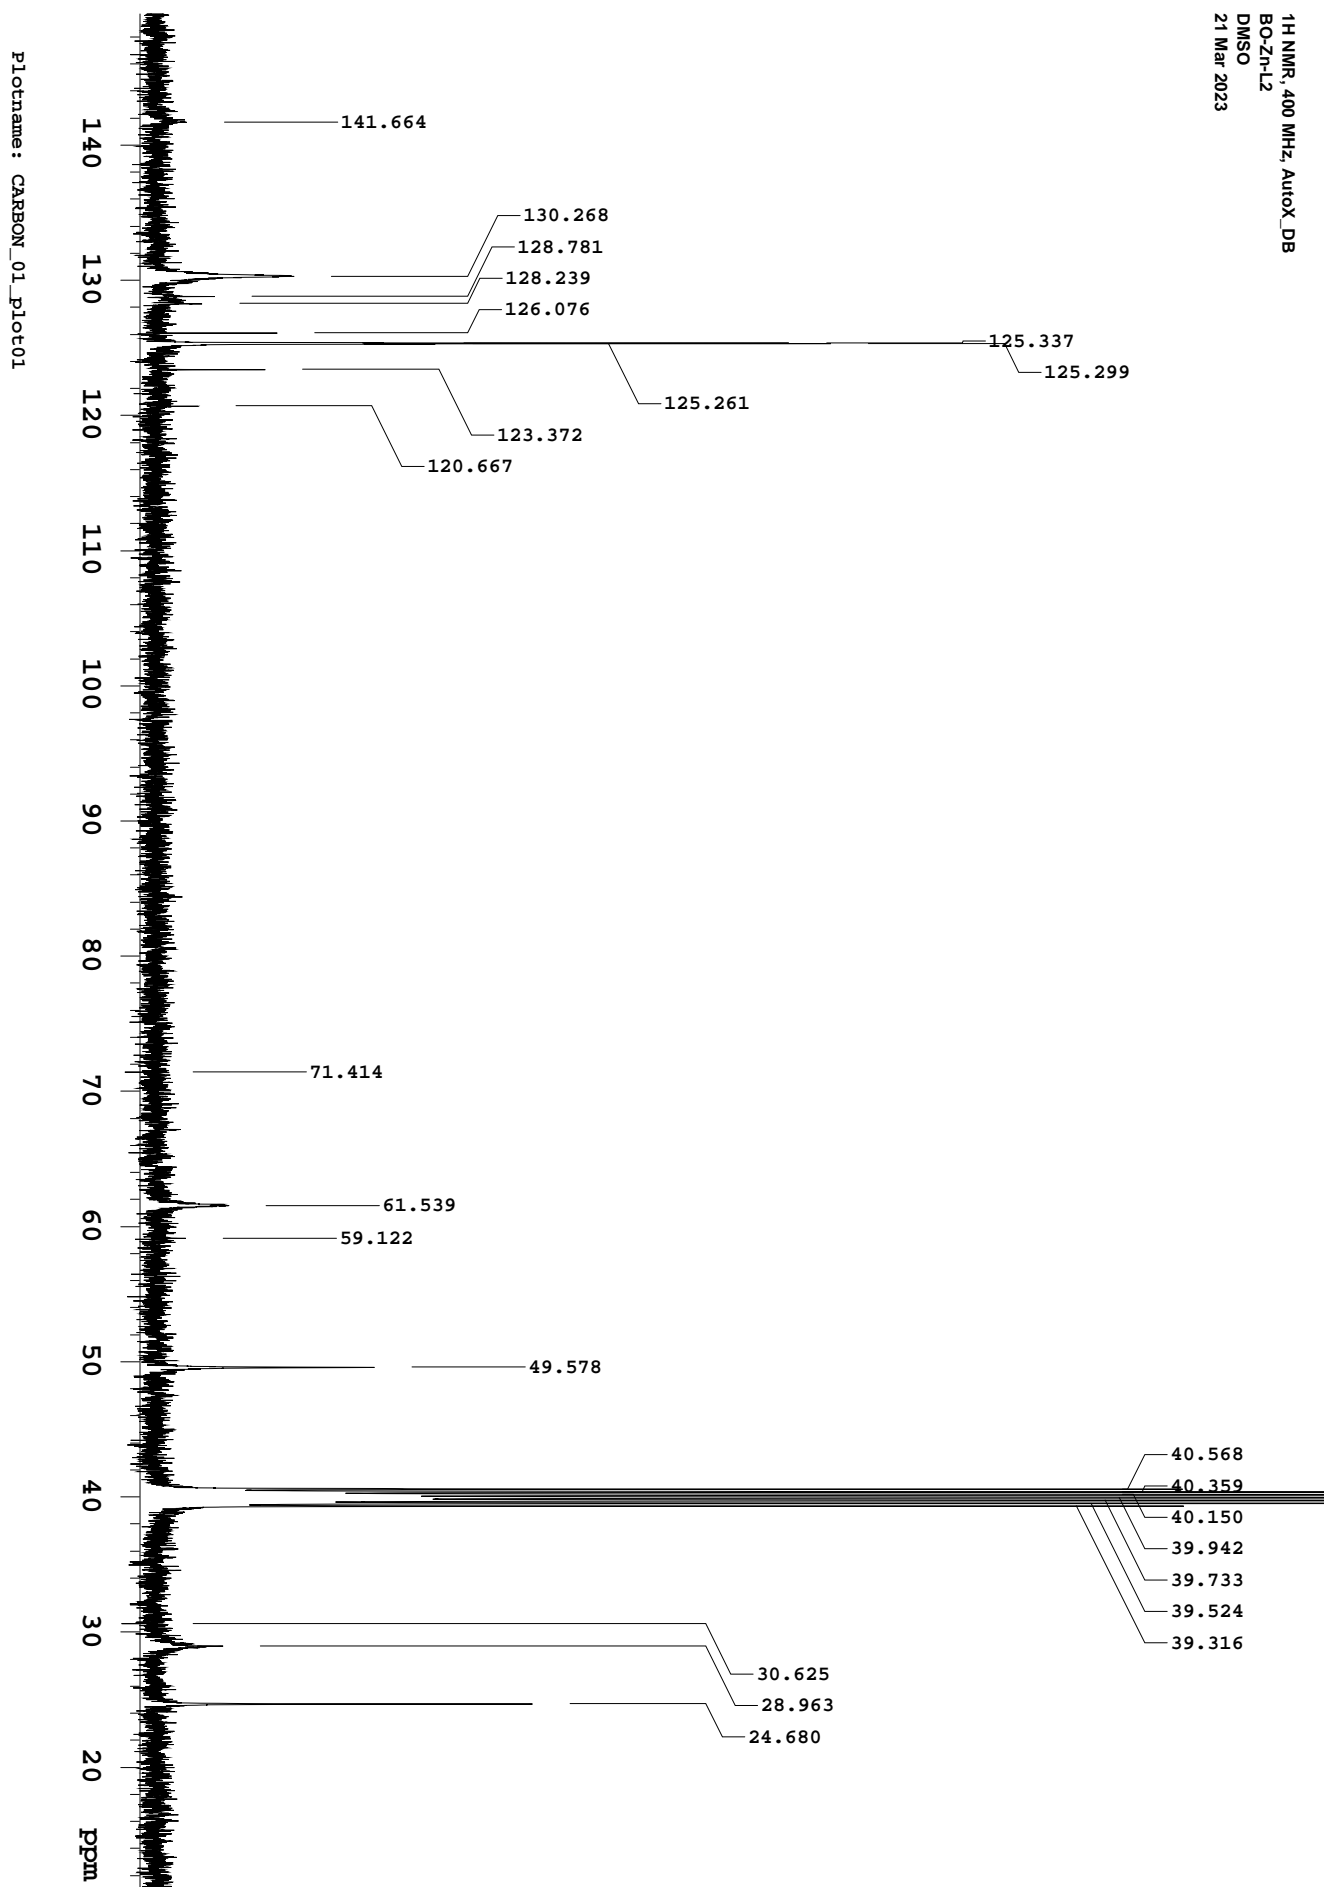

Supplement: s1 [file s1]

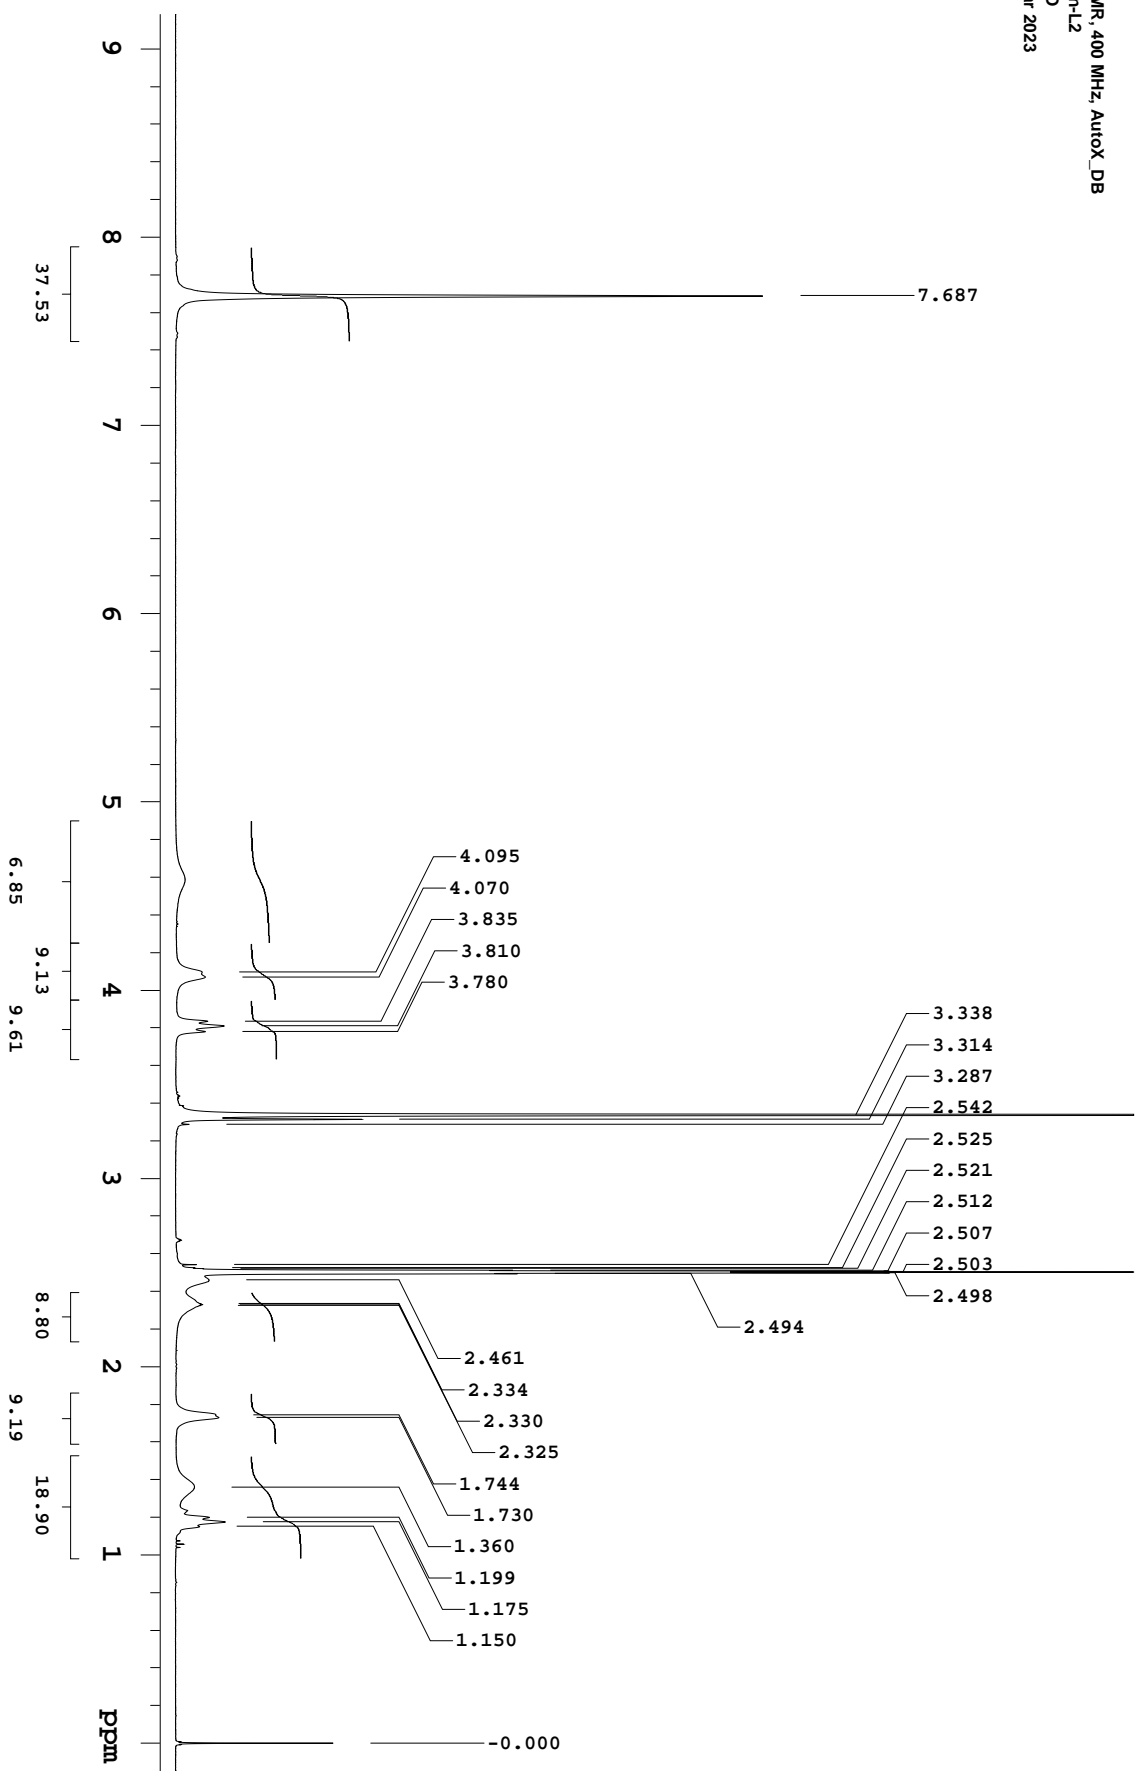

Supplement: s1 [file s1]

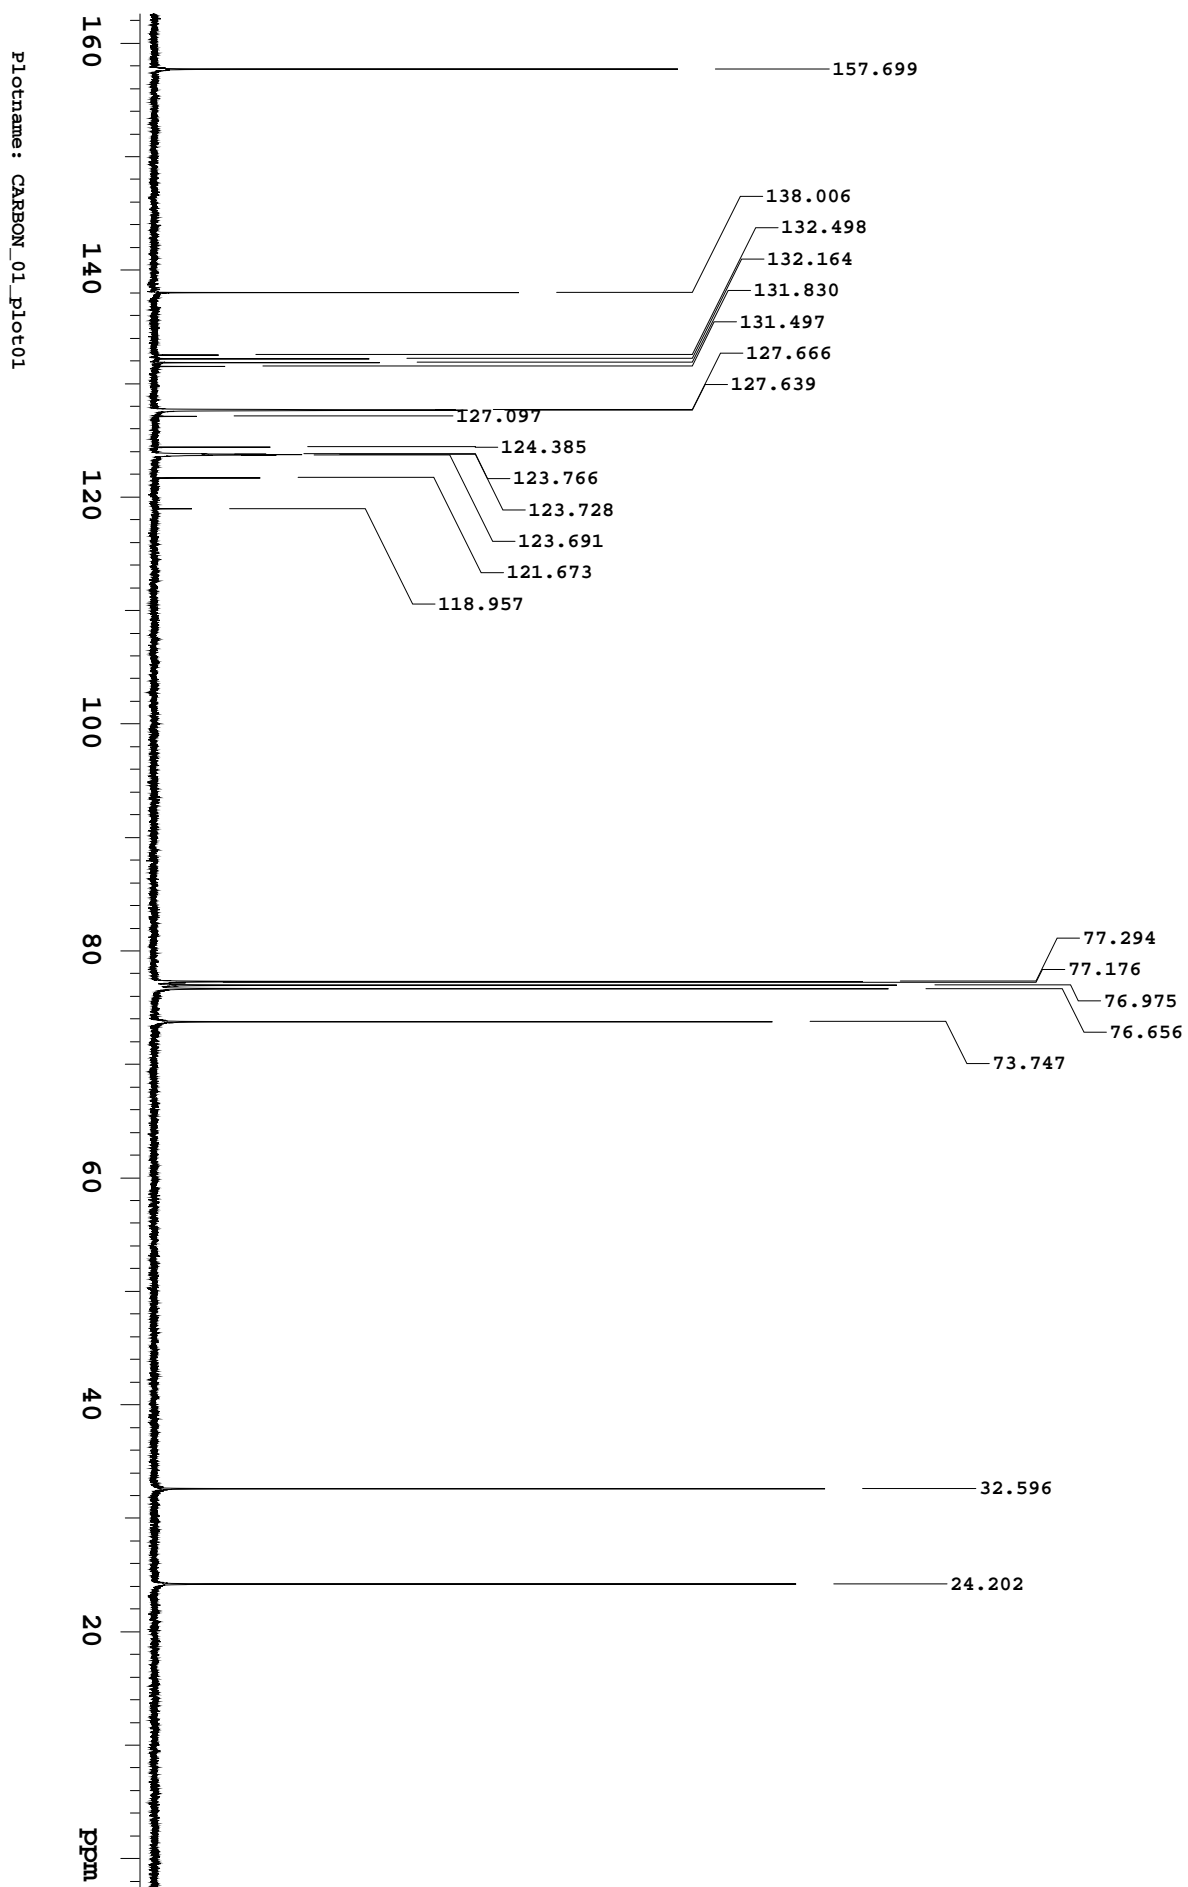

Supplement: s1 [file s1]

<sup>1</sup>H NMR, 400 MHz, AutoX\_DB  
BO-2R4  
CDCl<sub>3</sub>  
11 Nov 2020

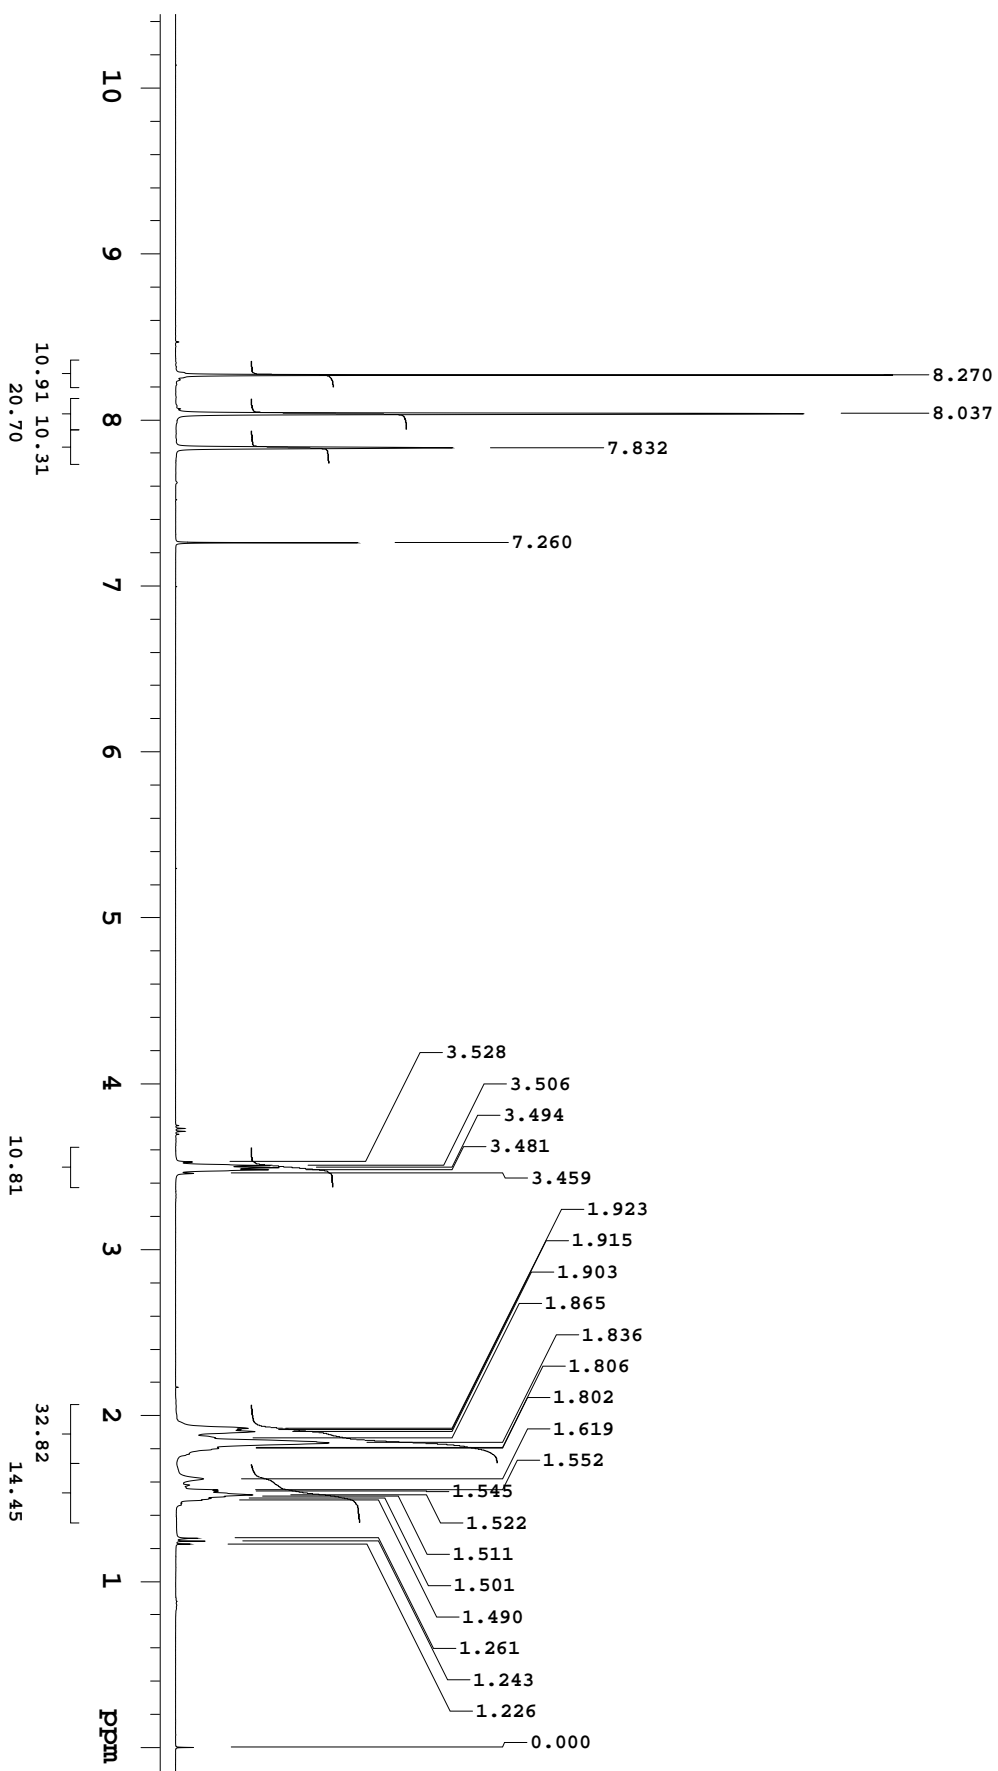

Supplement: s1 [file s1]

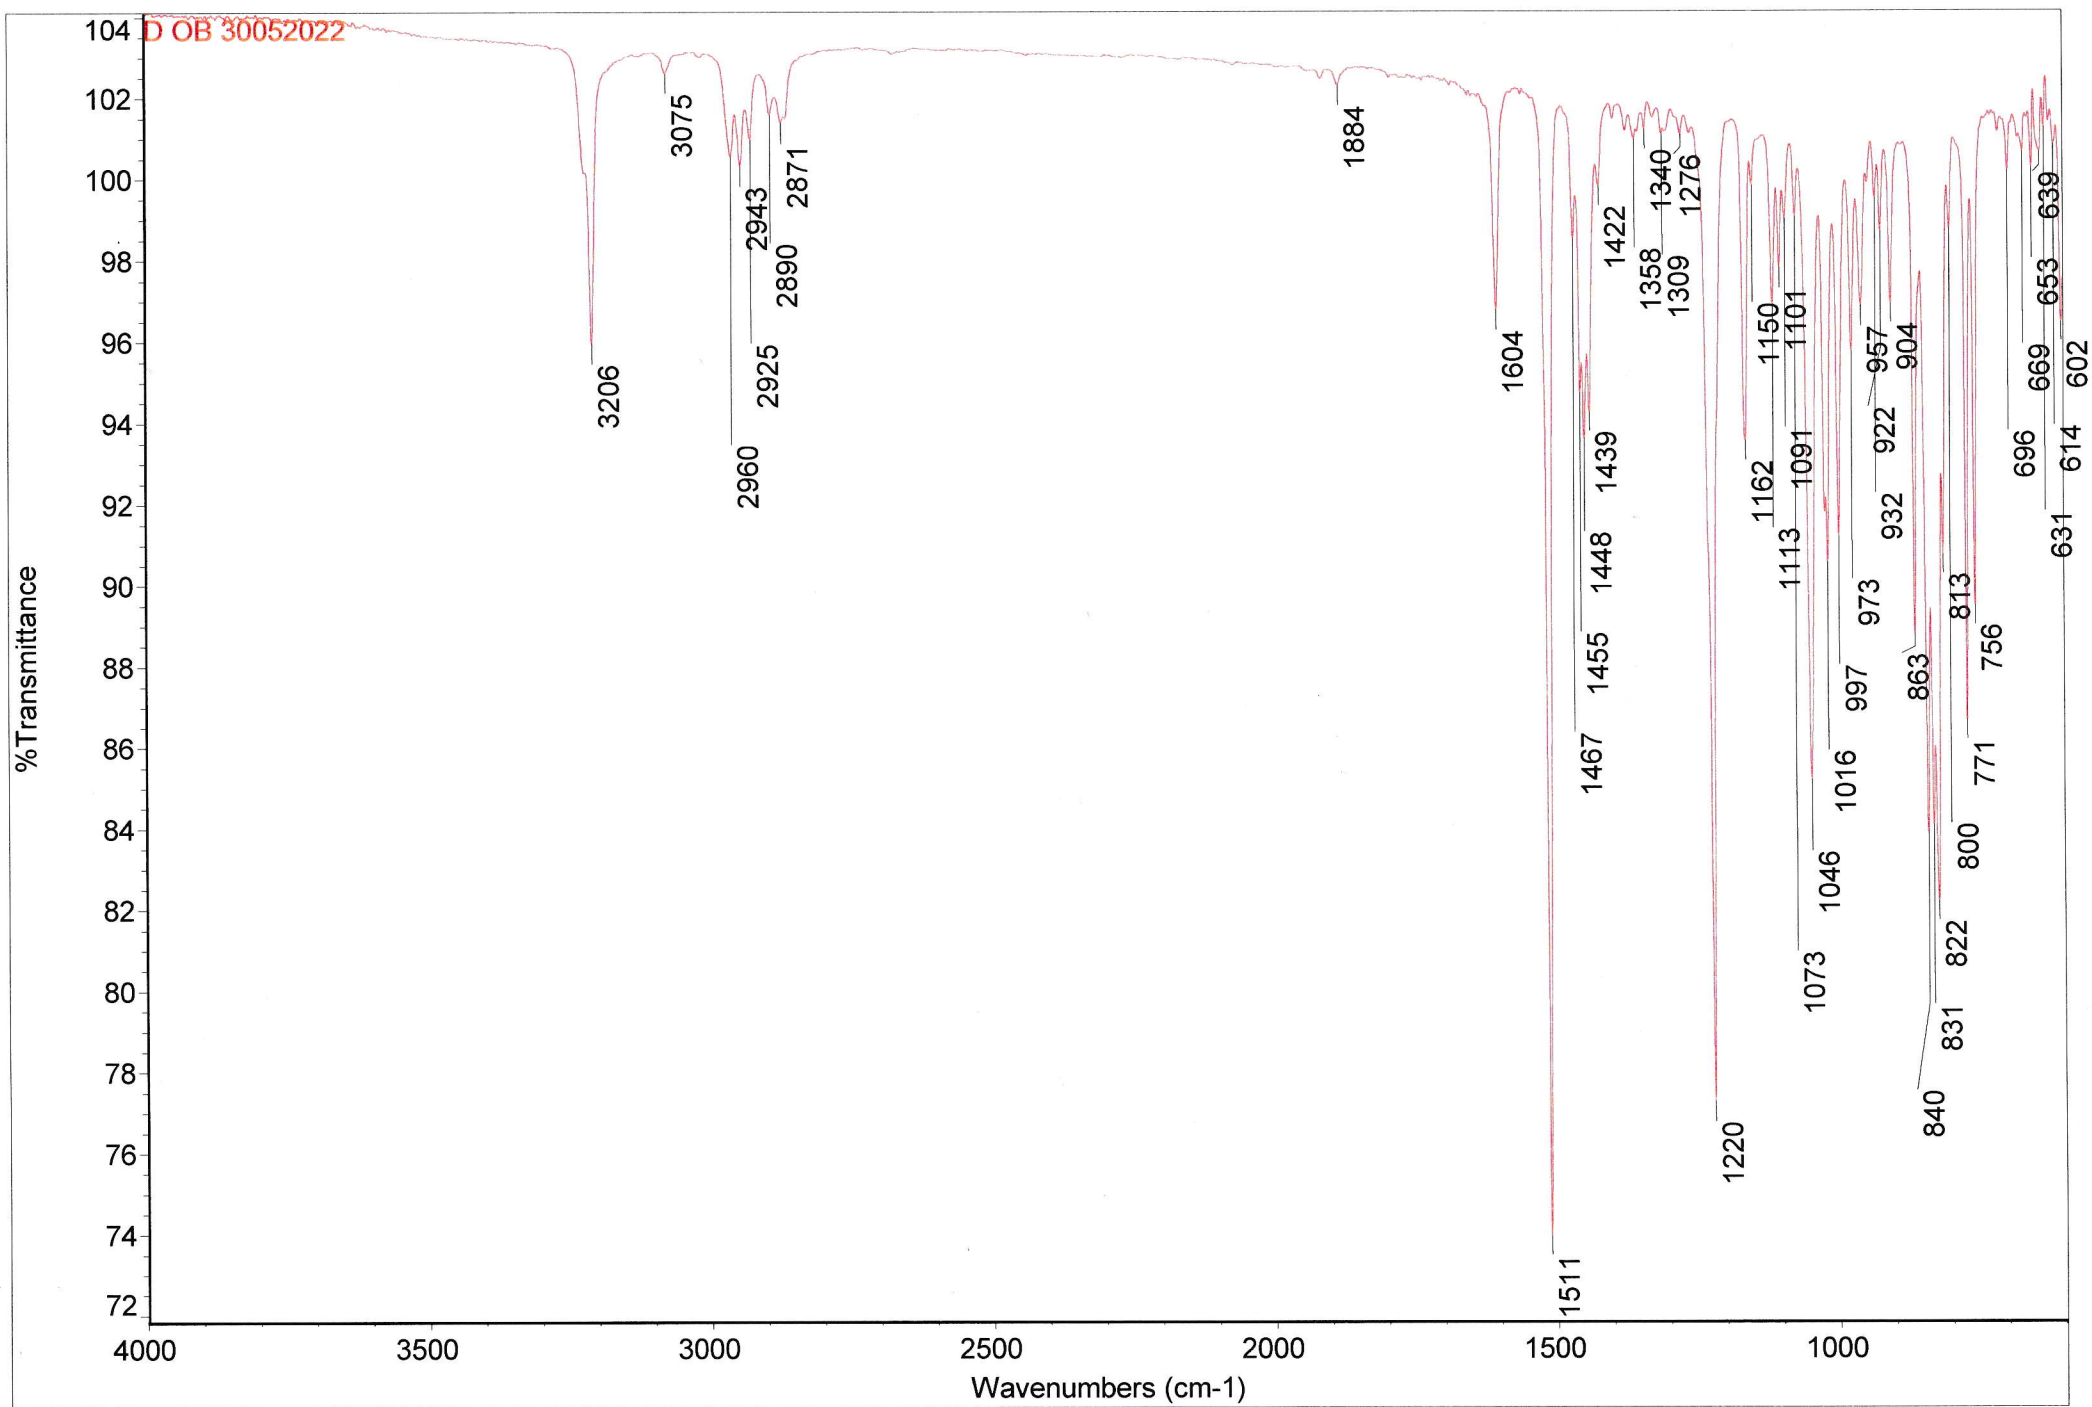

Supplement: s1 [file s1]

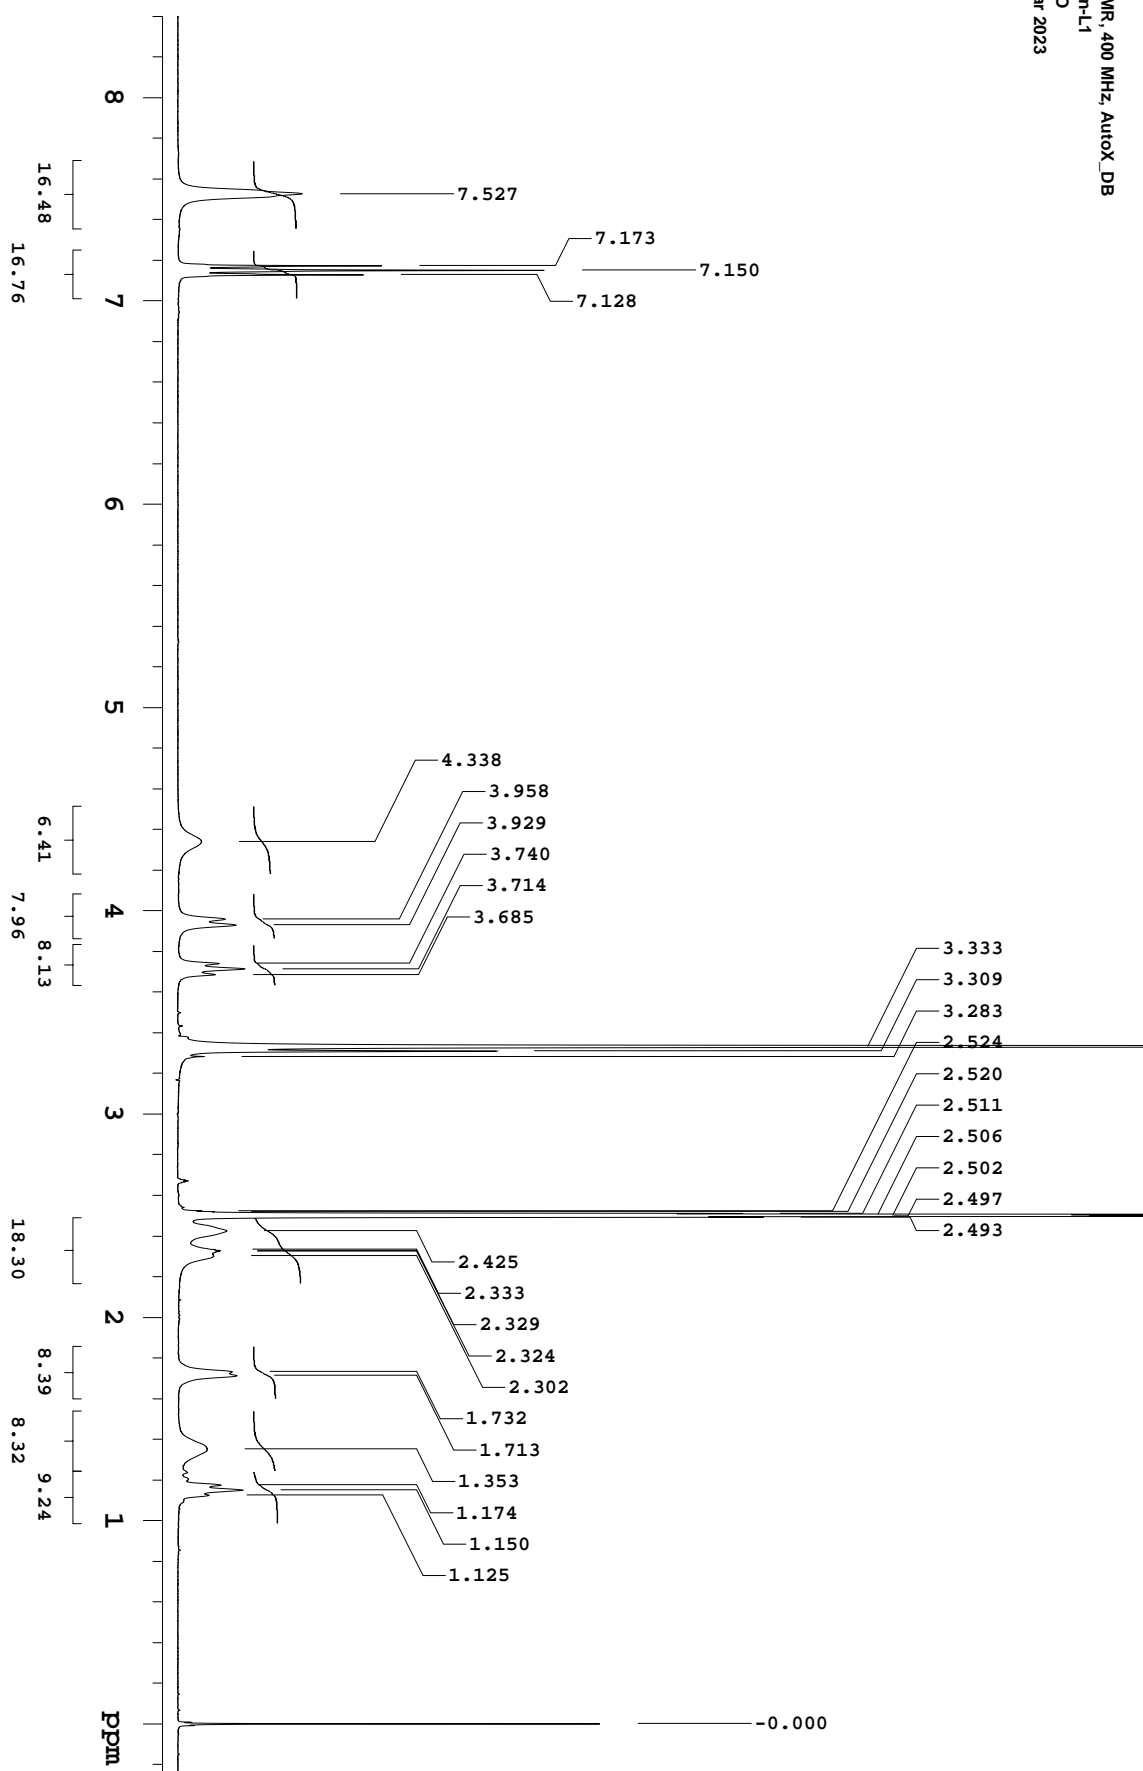

Supplement: s1 [file s1]

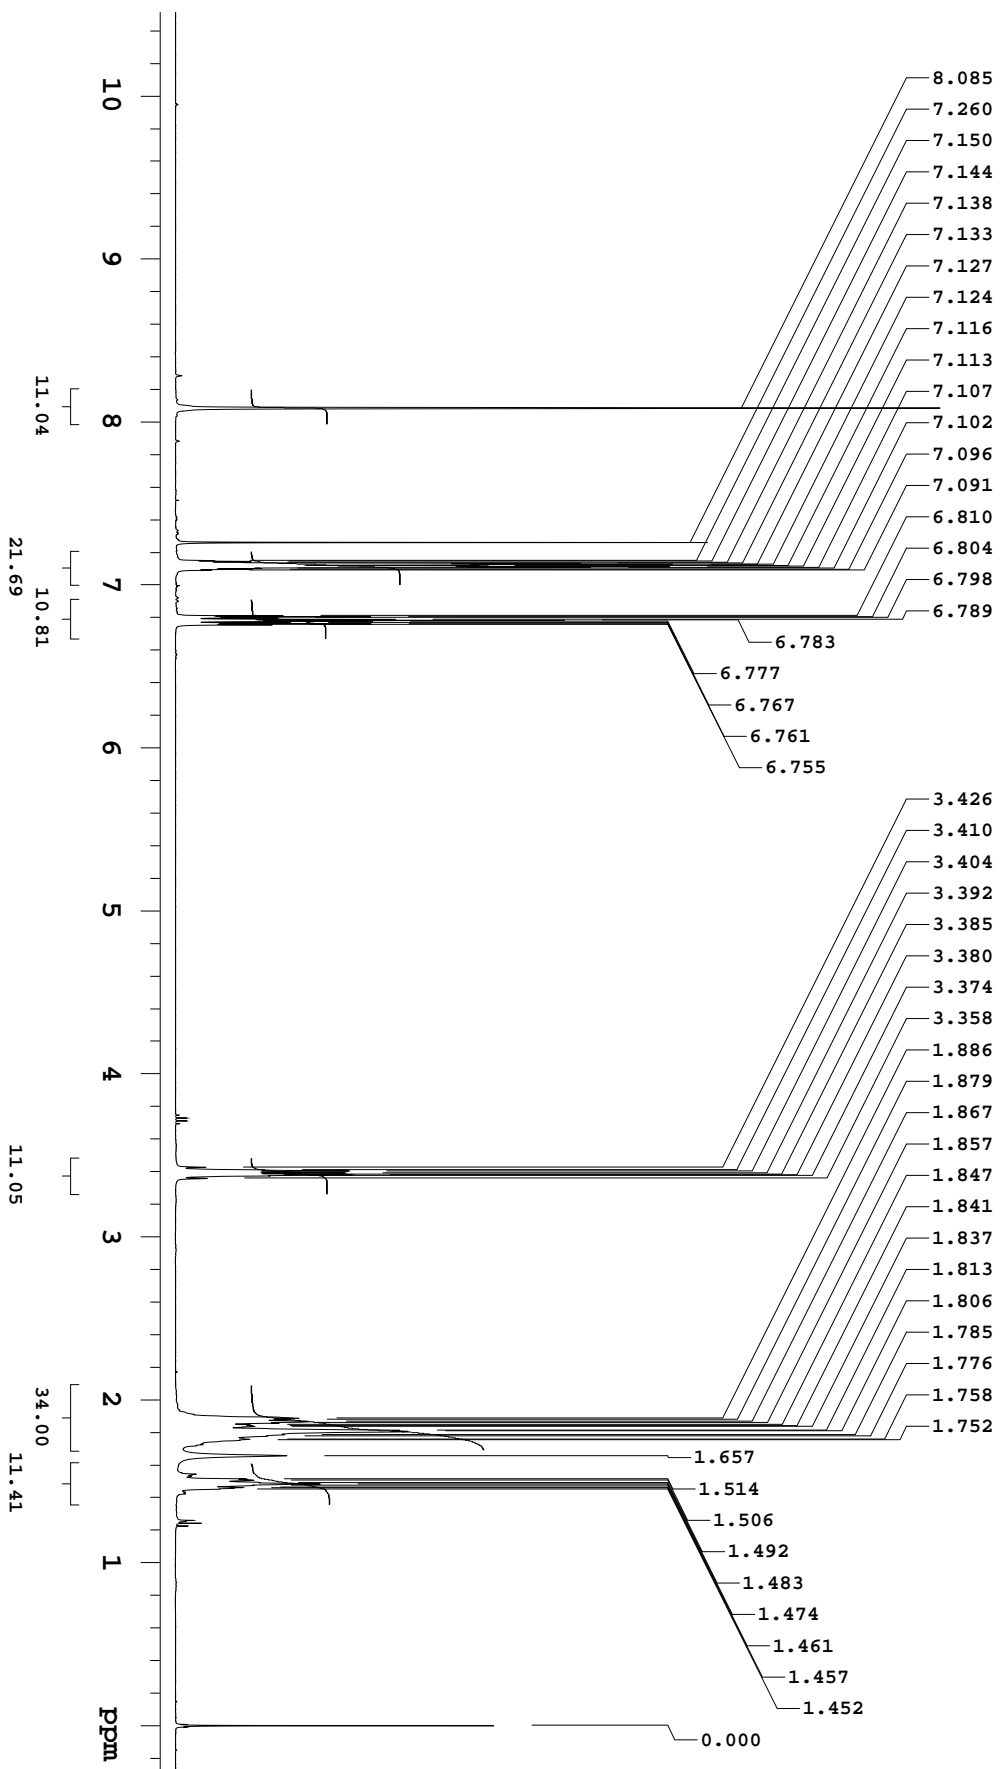

Supplement: s1 [file s1]

<sup>1</sup>H NMR, 400 MHz, AcetD<sub>2</sub>  
BO-2R4redHCl  
CD3OD  
13 Sept 2021

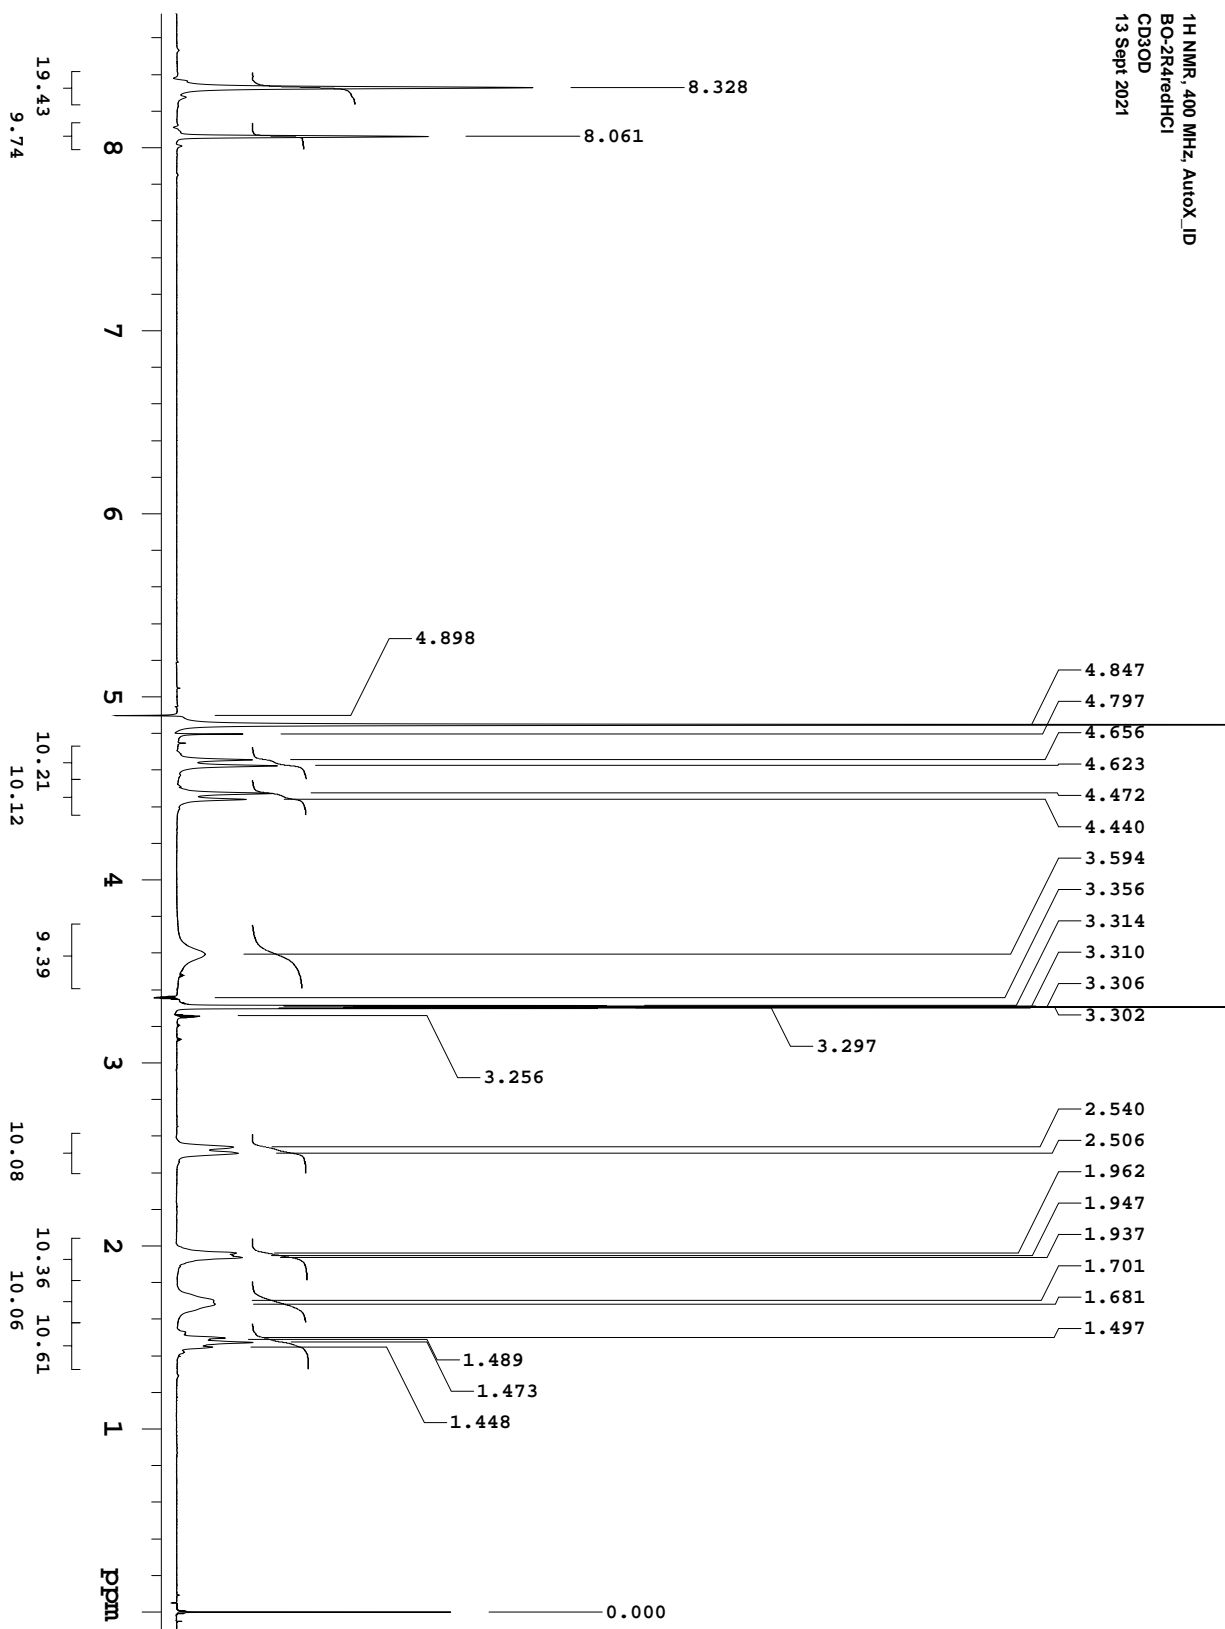

Plotname: PROTON\_01\_plot01

Supplement: s1 [file s1]

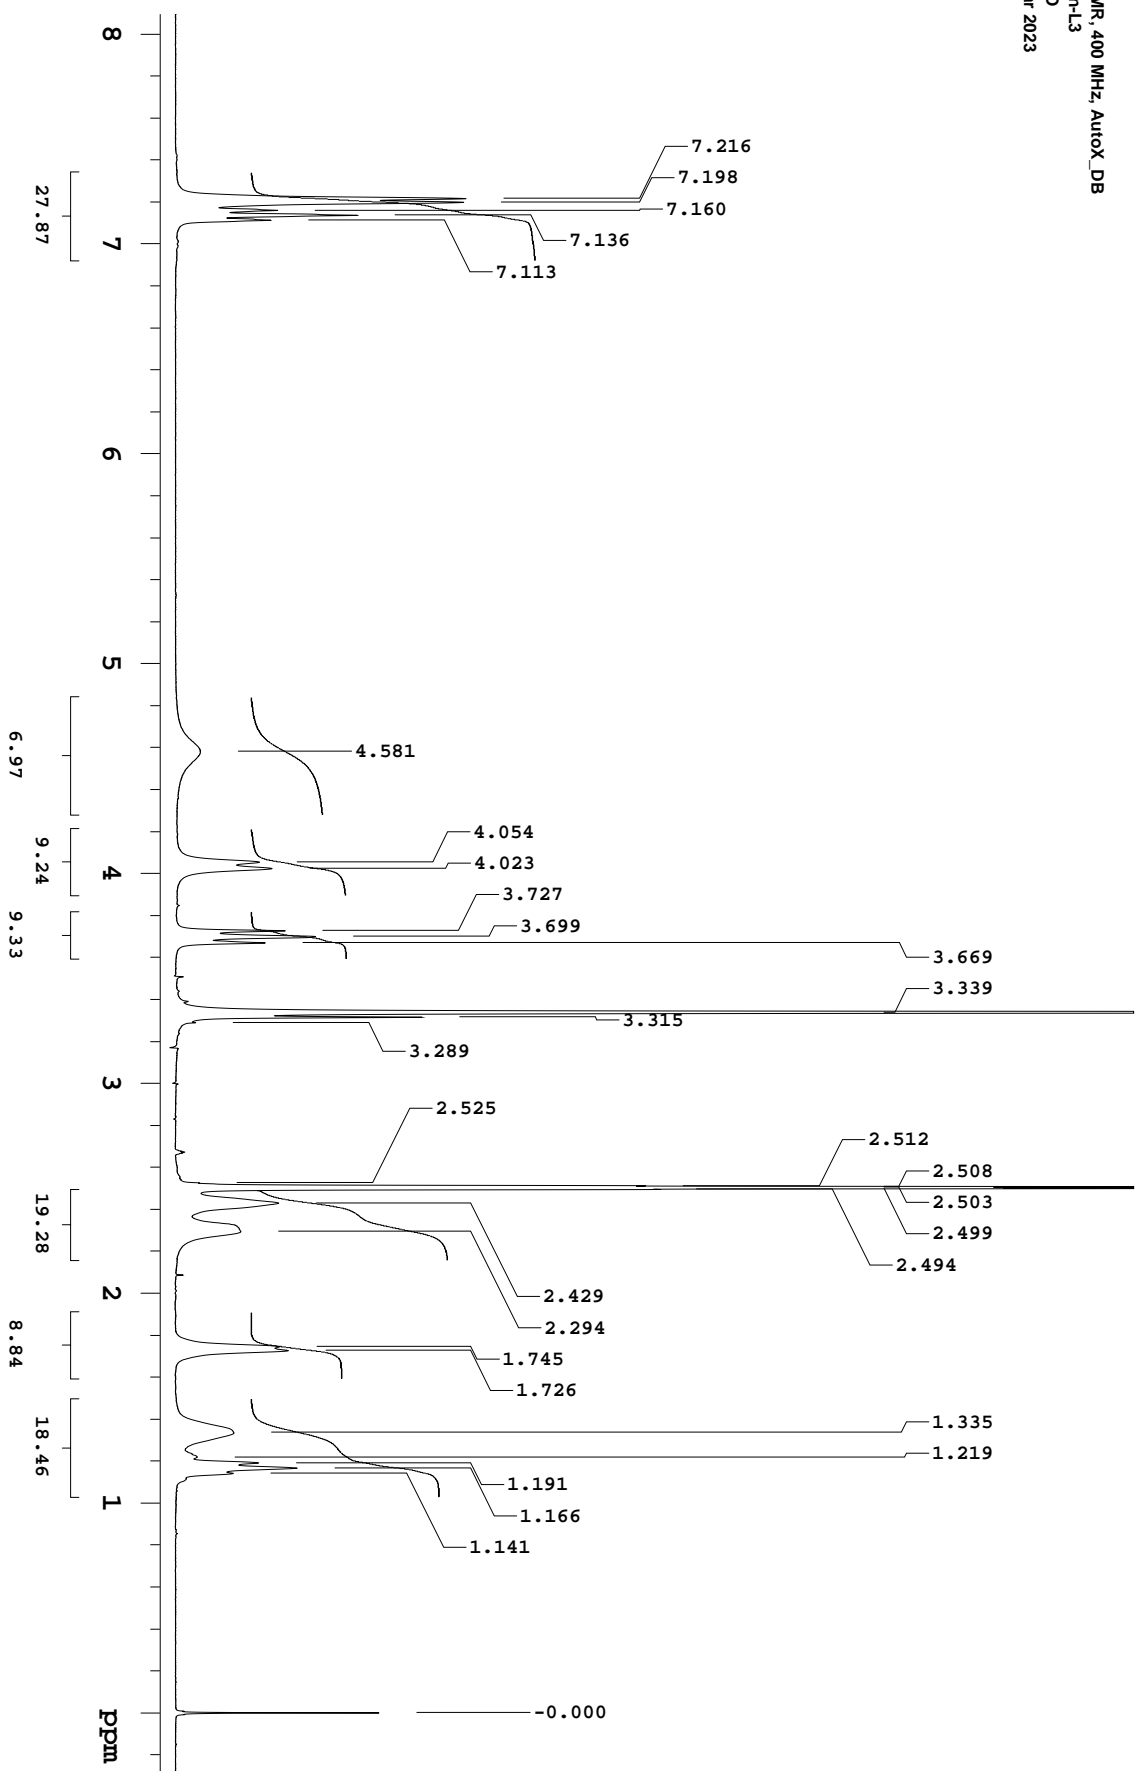

Supplement: s1 [file s1]

1H NMR, 400 MHz, AutoX\_DB  
BO-2R3  
CDCl3  
07 Sept 2021

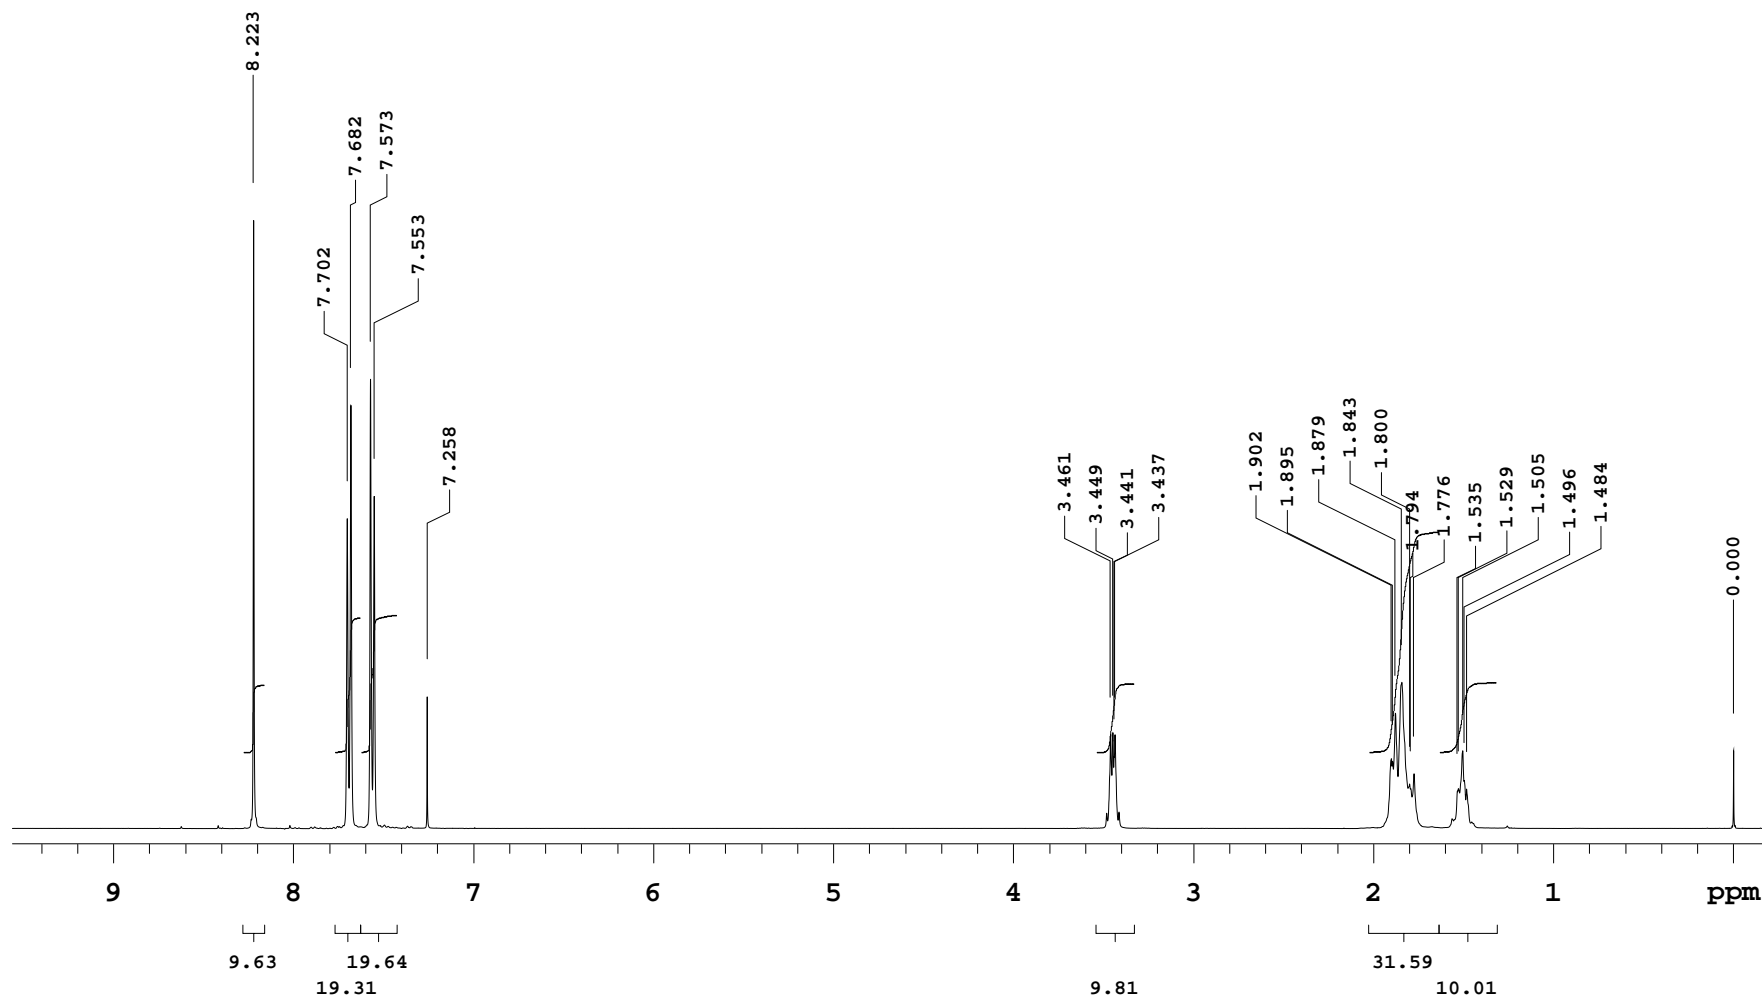

Plotname: PROTON\_01\_plot01

Supplement: s1 [file s1]

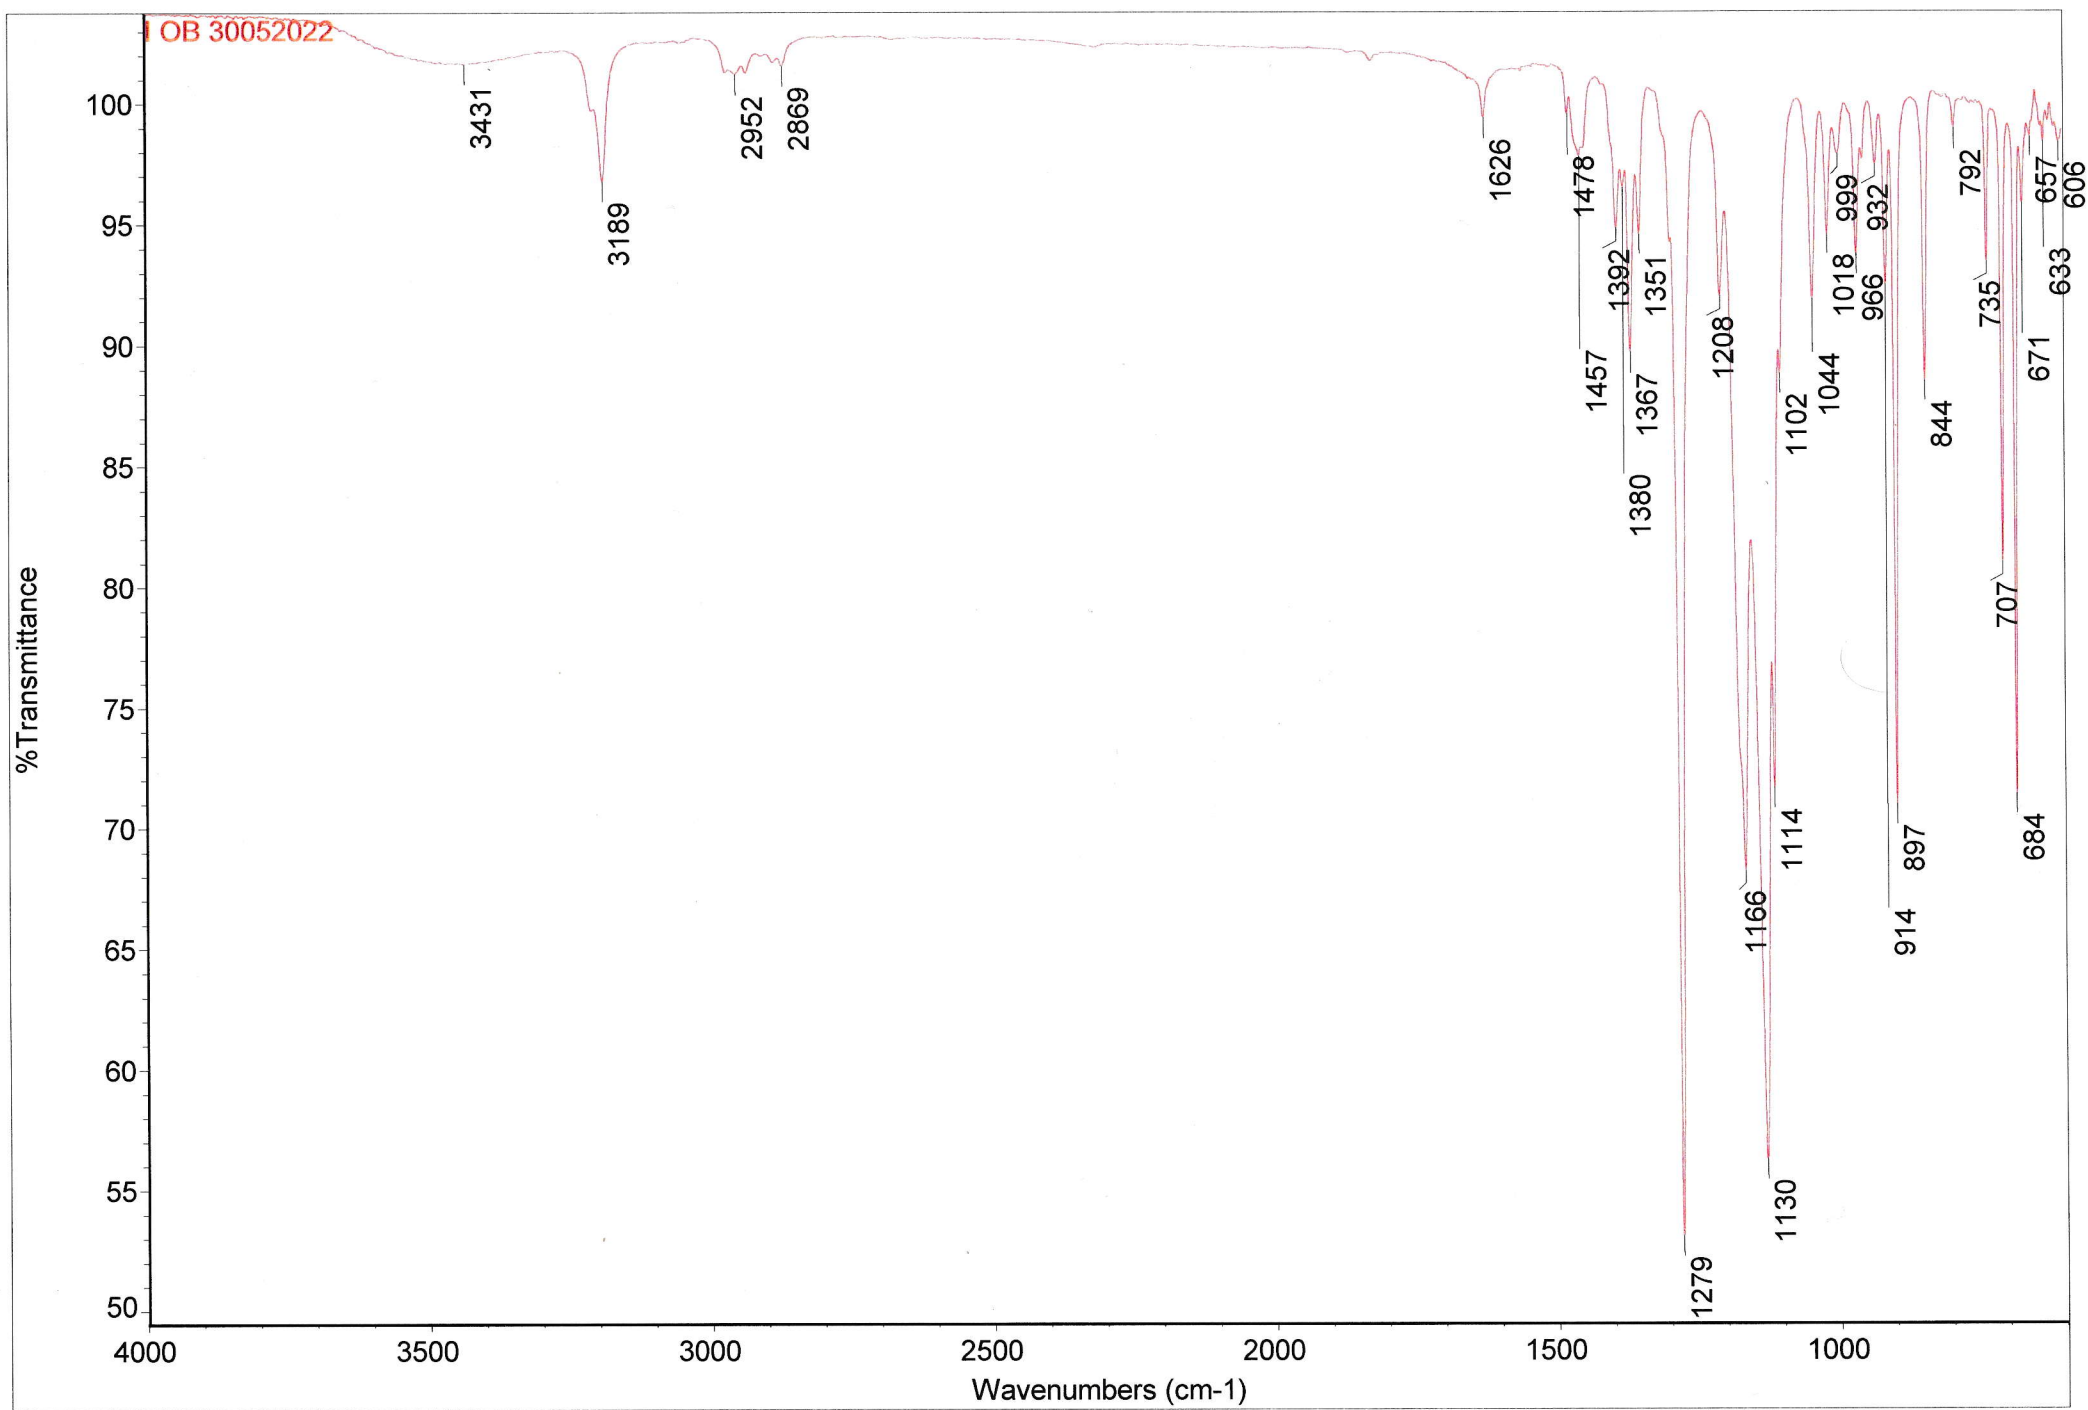

Supplement: s1 [file s1]

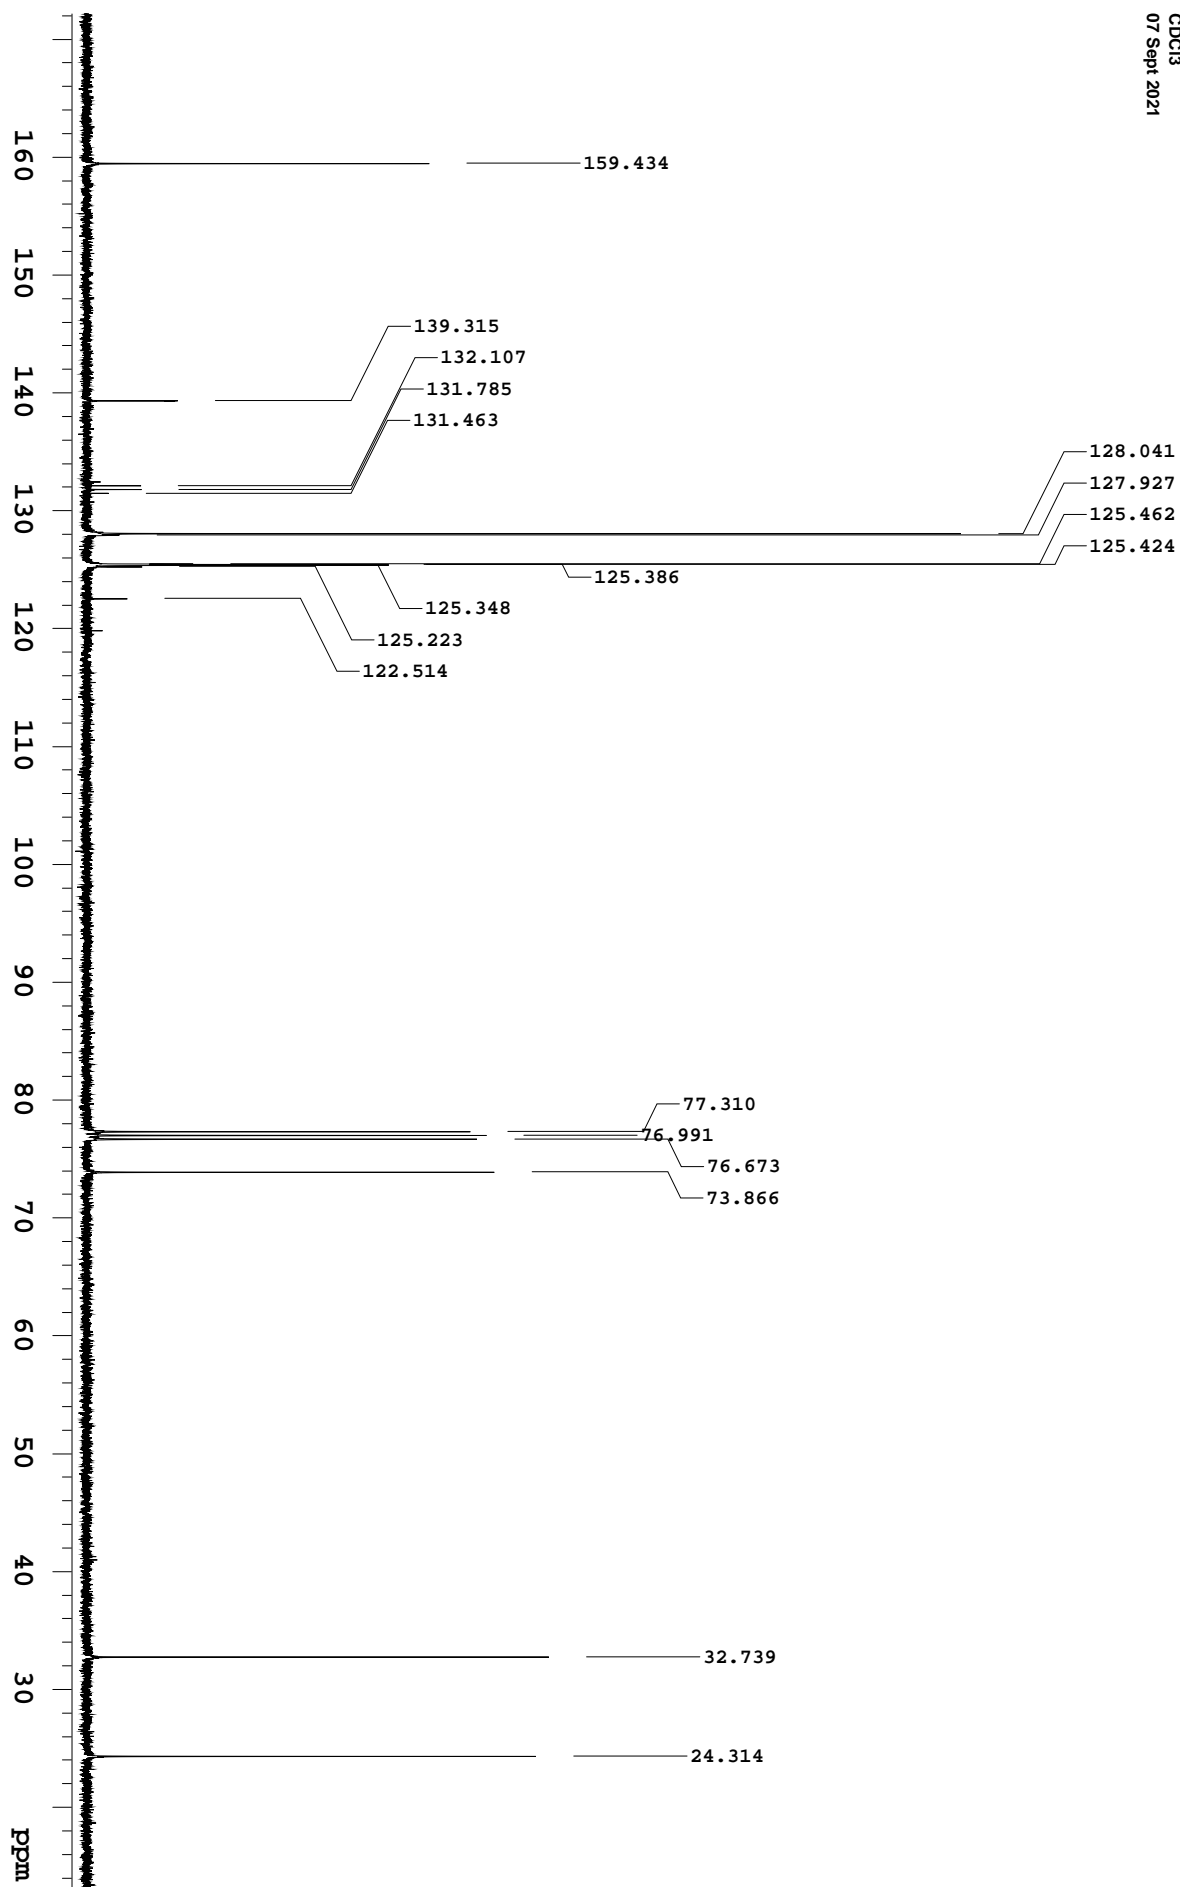

Supplement: s1 [file s1]

<sup>13</sup>C NMR, 100 MHz, AutoX\_DB  
BO-Zn-L4  
DMSO  
21 Mar 2023

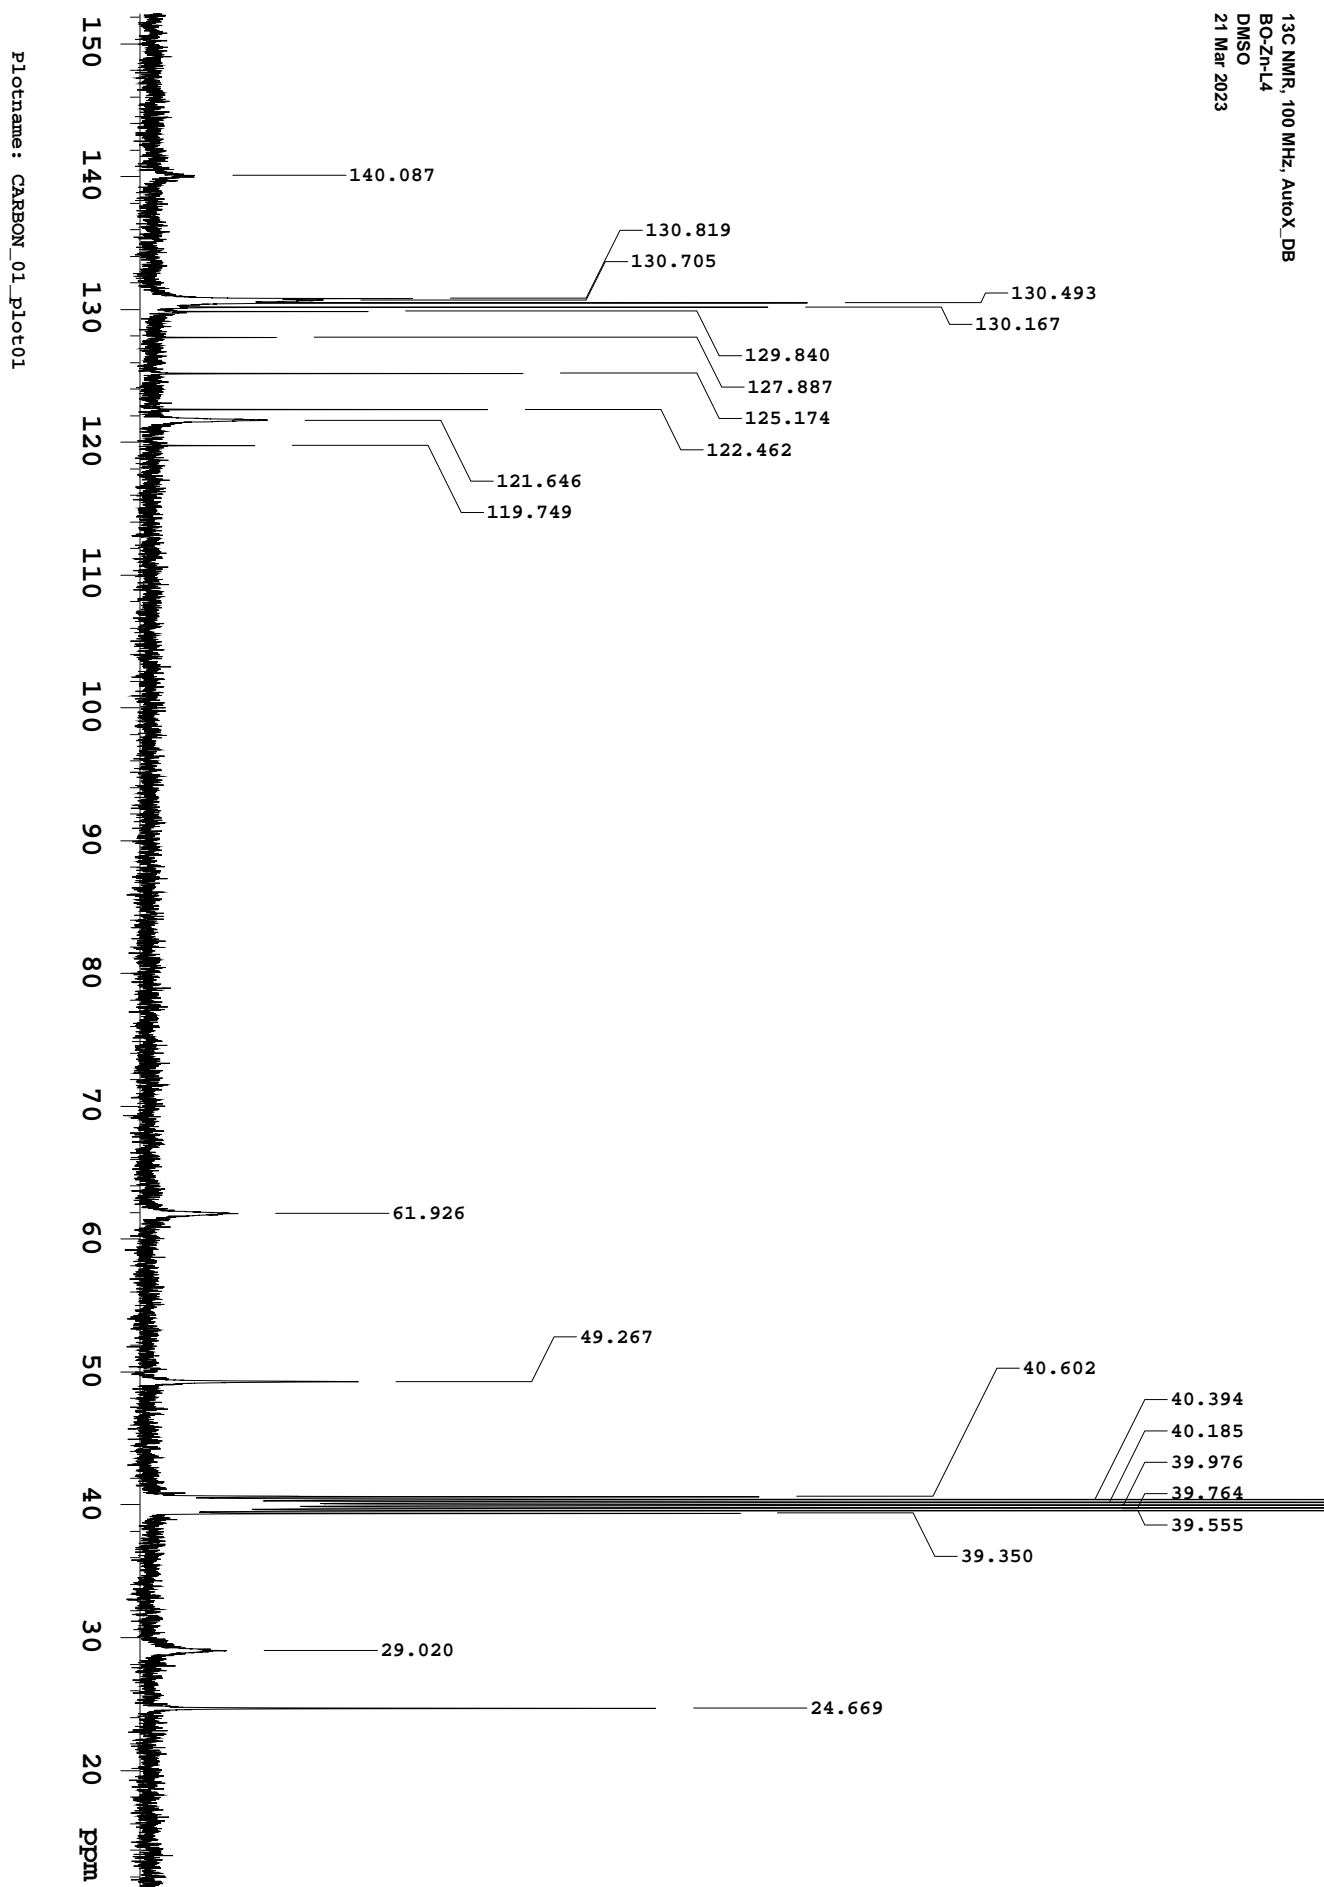

Supplement: s1 [file s1]

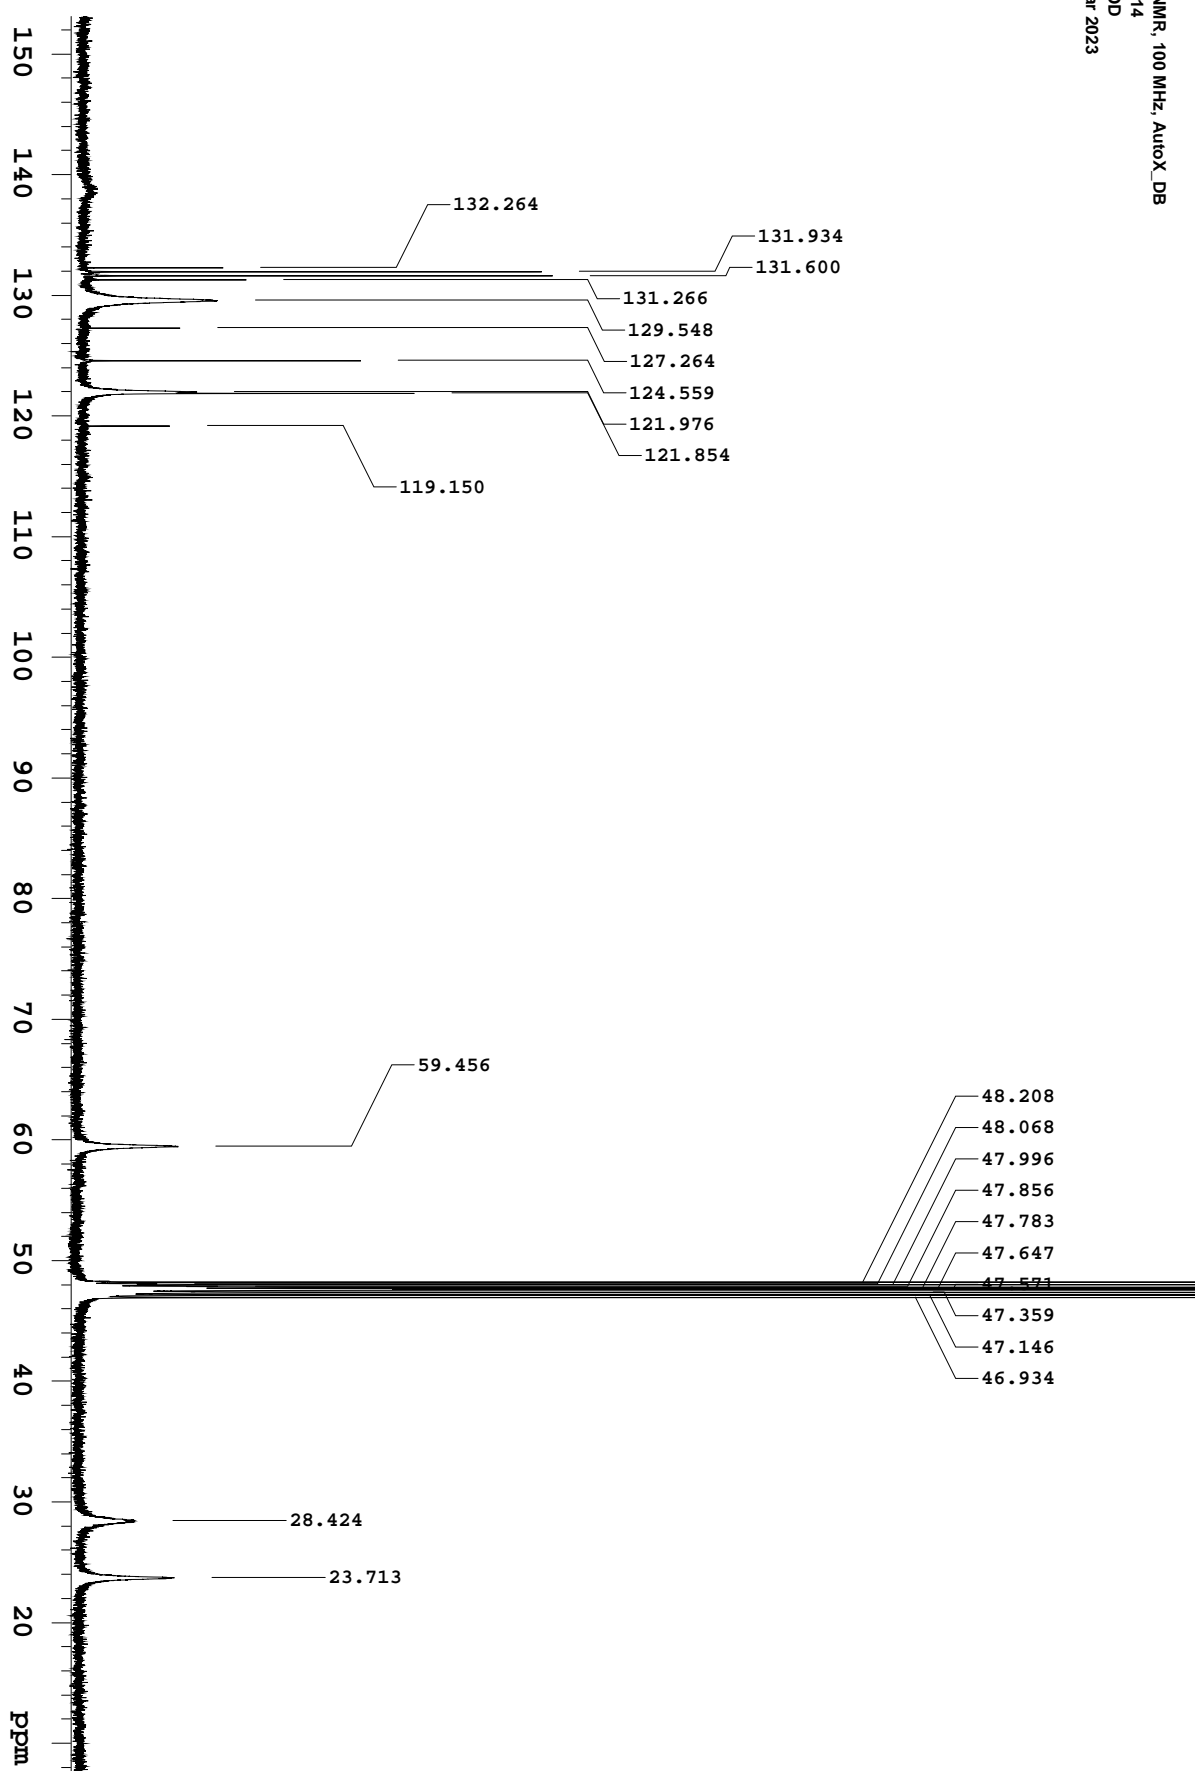

Supplement: s1 [file s1]

<sup>1</sup>H NMR, 400 MHz, AutoX\_DB  
BO-Zn-L1  
DMSO  
20 Mar 2023

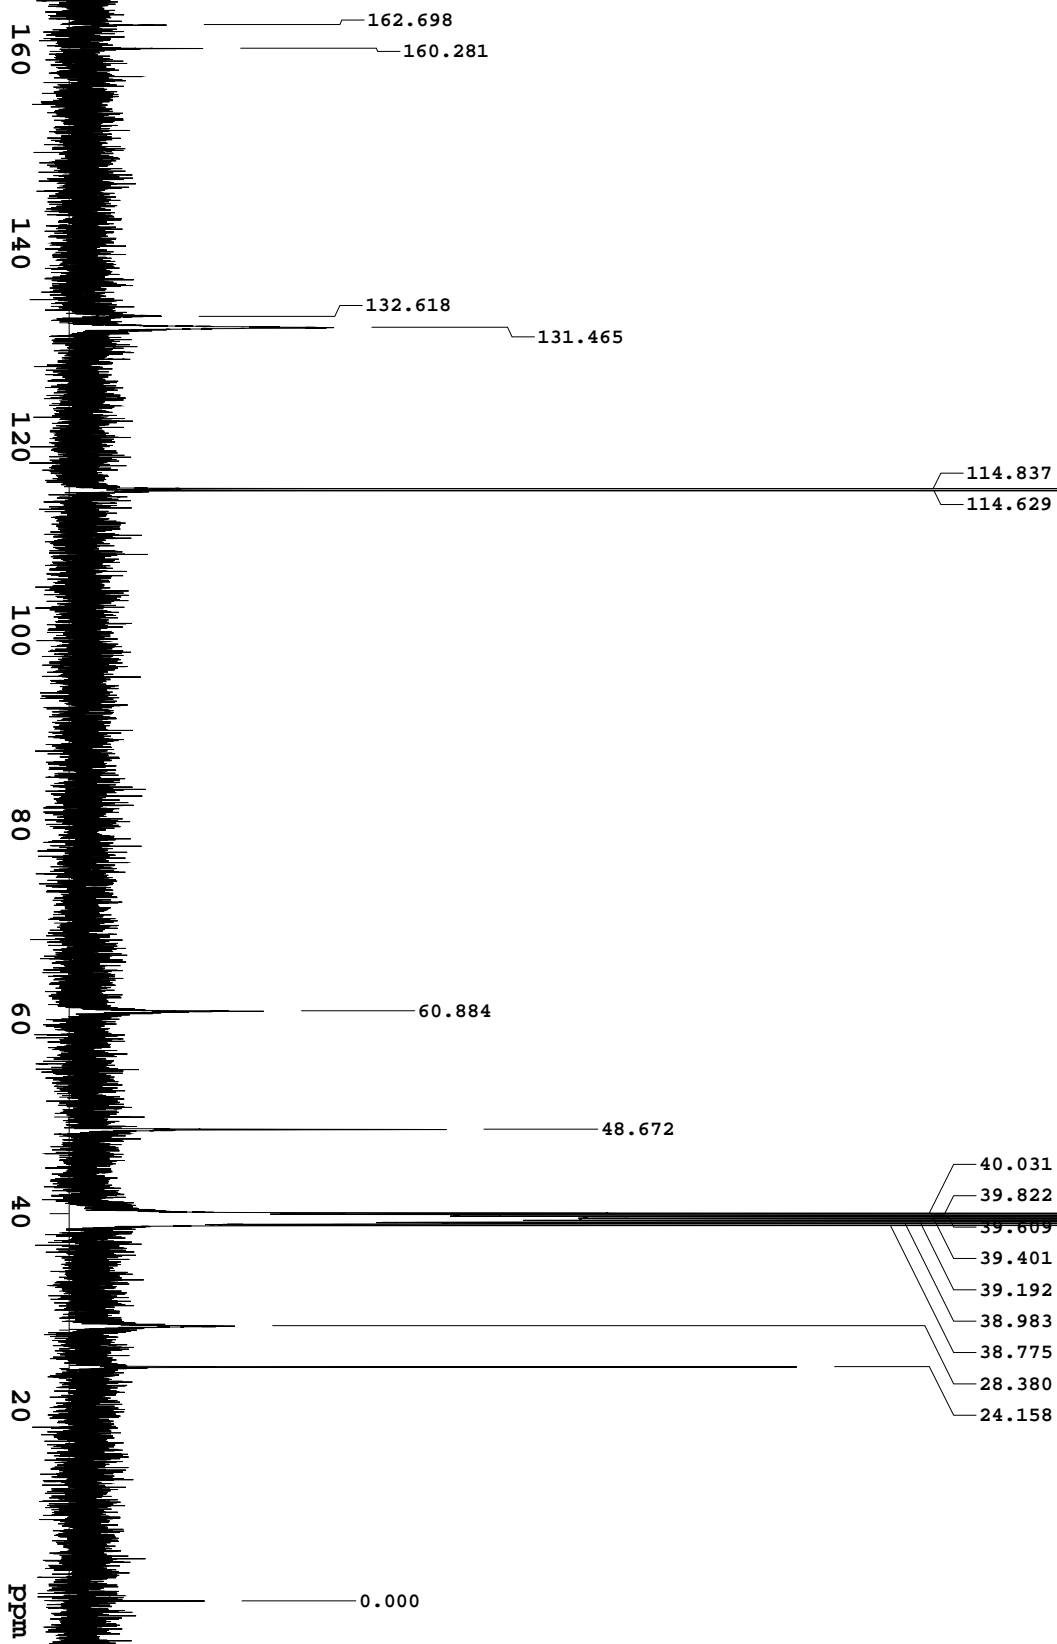

Plotname: CARBON\_02\_plot01

Supplement: s1 [file s1]

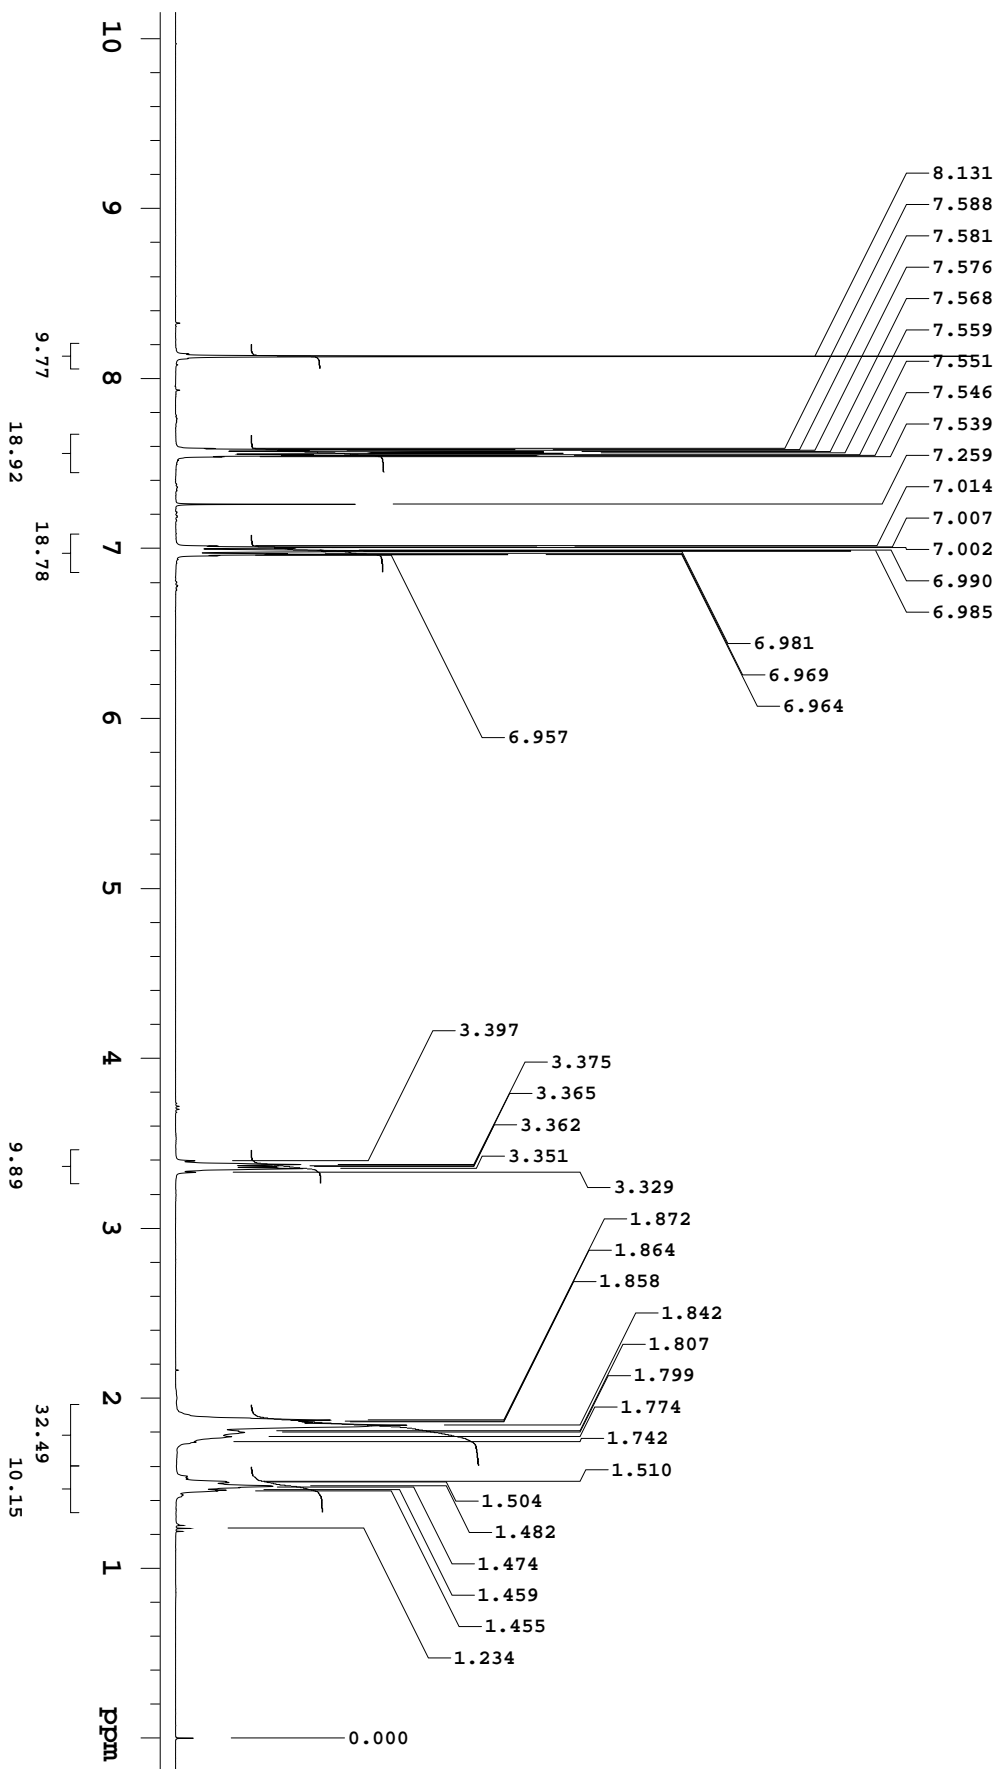

Supplement: s1 [file s1]

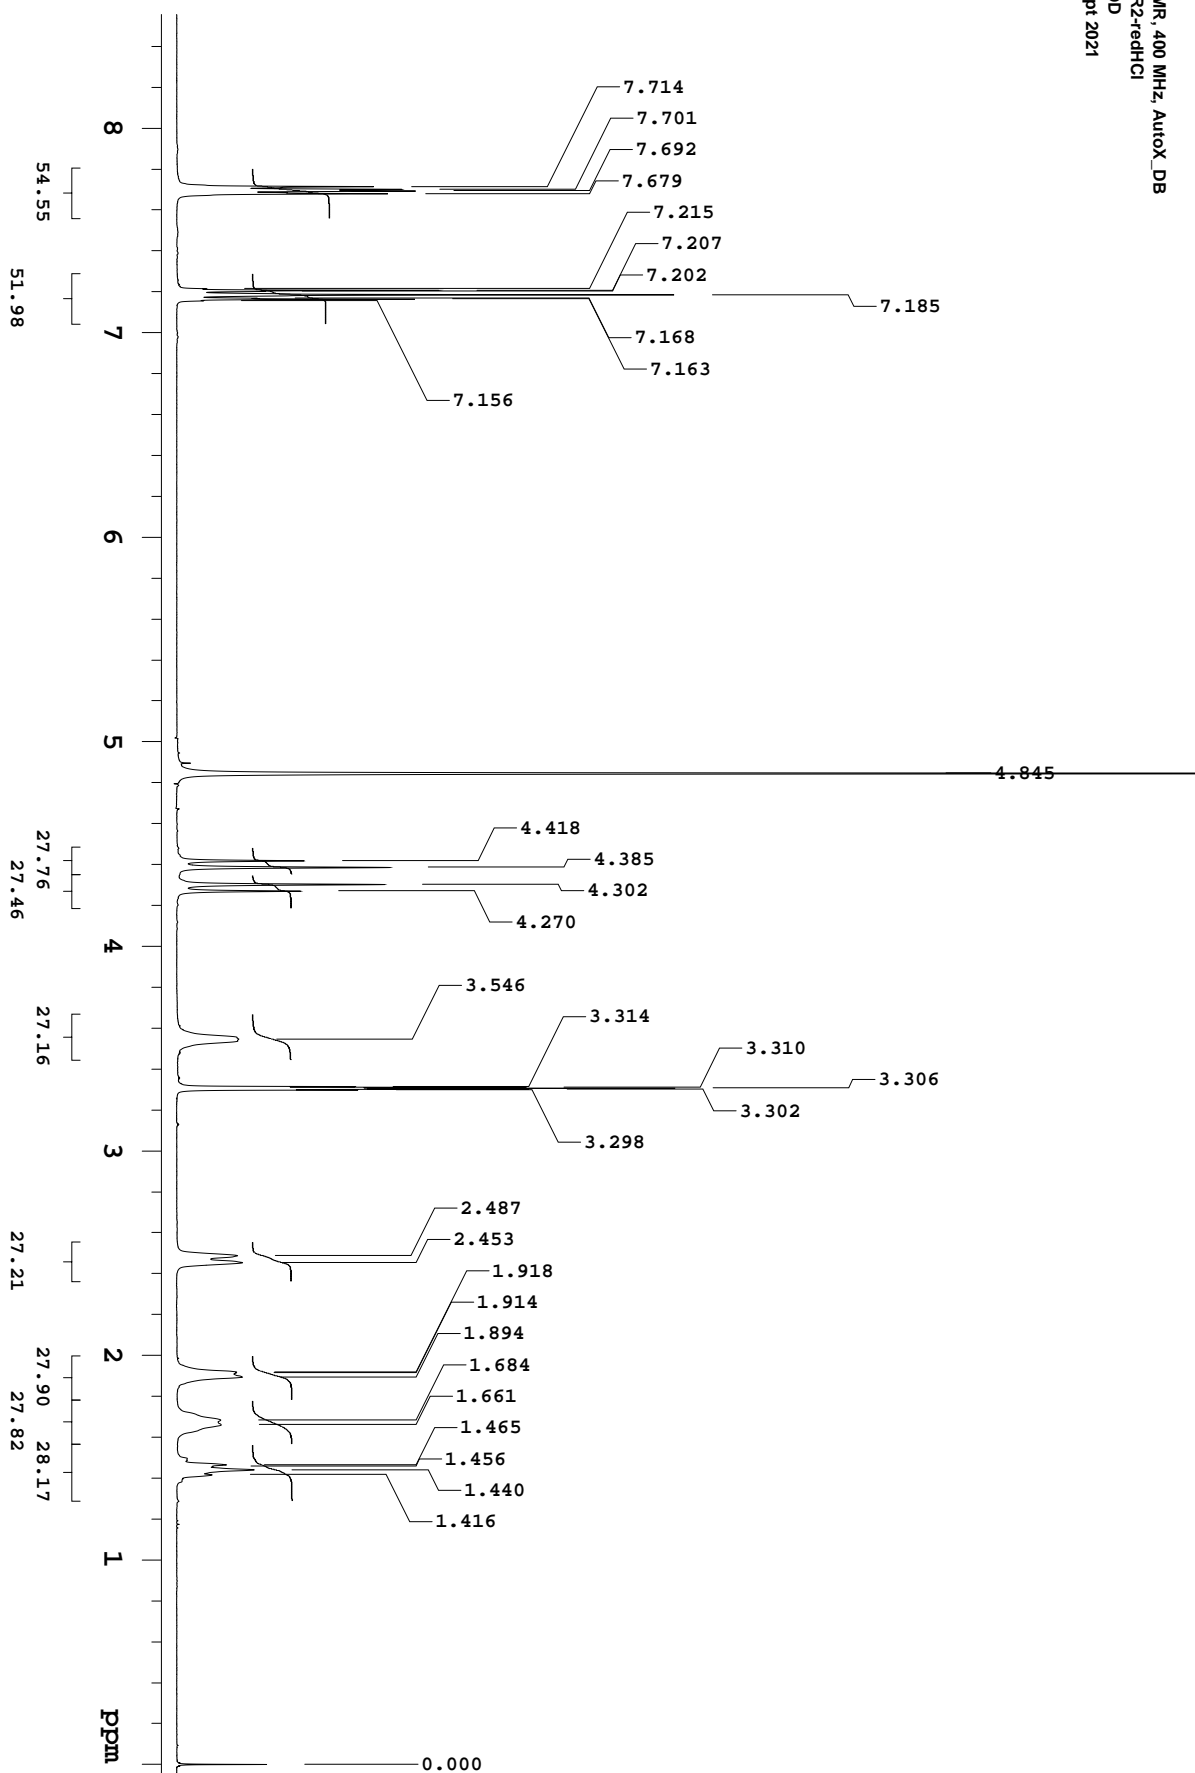

Supplement: s1 [file s1]
